# Supplementary material
Source: PubMed Central journal article supplement (PMC2974763)
Supplement: NIHMS241429-supplement-1_si_001.pdf [file NIHMS241429-supplement-1_si_001.pdf]

**Supplementary Information for**  
**“Global Proteome Quantification for Discovering Imatinib-induced**  
**Perturbation of Multiple Biological Pathways in K562 Human**  
**Chronic Myeloid Leukemia Cells”**

**by Lei Xiong, et al.**

**(*J. Proteome Res.*, 2010, Volume 9)**

**Figure S1.** Light microscopic images for control (A) and imatinib-treated (B) K562 cells after benzidine staining.

A.

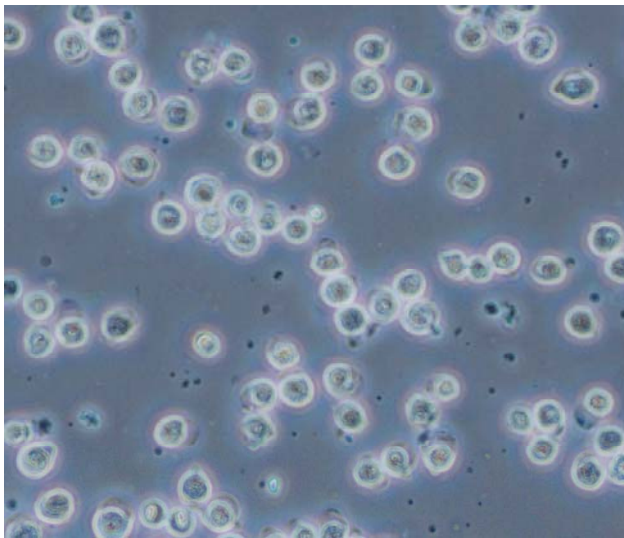

B.

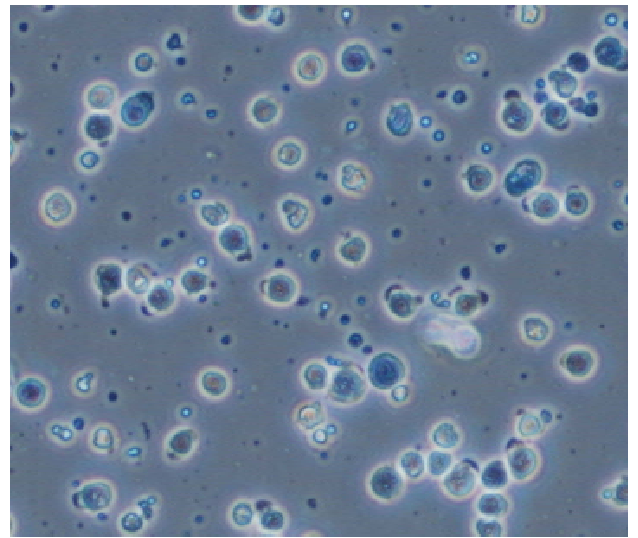

**Figure S2.** The heme biosynthesis pathway. Enzymes catalyzing the individual reactions in this pathway are indicated. The three enzymes found, by SILAC experiments, to be altered upon imatinib treatment are highlighted in red. Abbreviations: PBGD, porphobilinogen deaminase; UCoS, uroporphyrinogen III cosynthase; UROD, uroporphyrinogen decarboxylase; CPO, coproporphyrinogen oxidase; PPO, protoporphyrinogen oxidase; side chains: A,  $-\text{CH}_2\text{COO}^-$ ; P,  $-\text{CH}_2\text{CH}_2\text{COO}^-$ ; V,  $-\text{CH}=\text{CH}$ ; M,  $-\text{CH}_3$ .

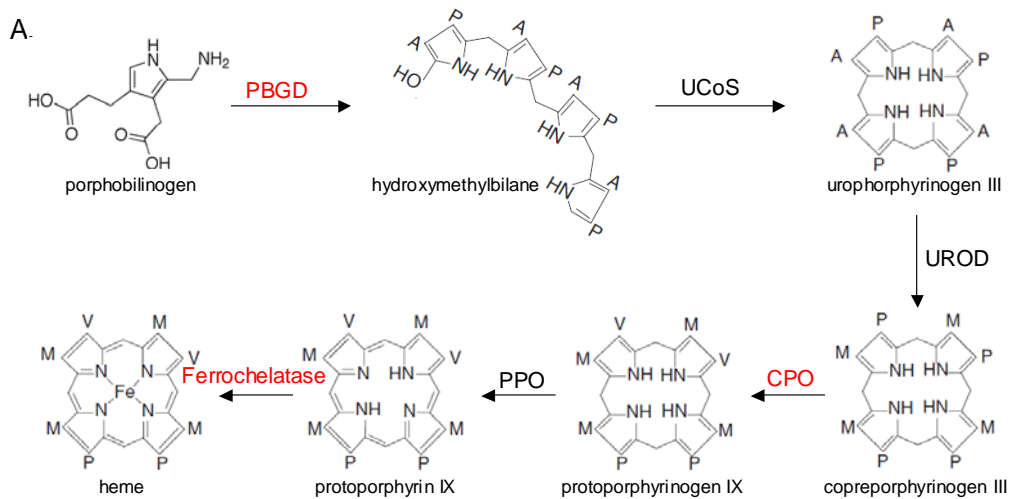

**Figure S3.** LC-MS of the intact histone H4 extracted from control (A) and imatinib-treated (B)

K562 cells. The spectra were acquired on the Agilent QTOF mass spectrometer.

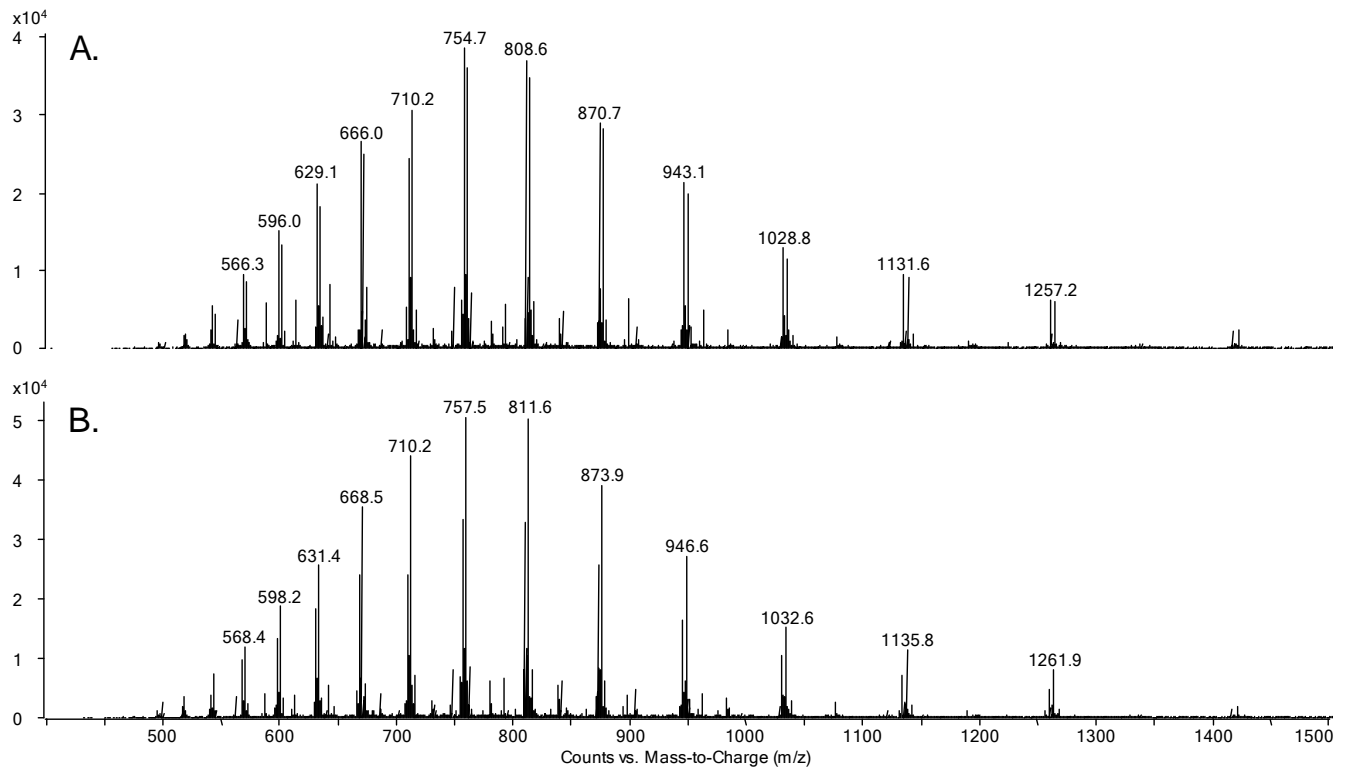

**Figure S4.** ESI-LC-MS/MS for the Asp-N-produced mono- (A), di- (B), and tri-acetylated (C)  $_{1}\text{S}\text{R}\text{G}\text{K}\text{G}\text{G}\text{K}\text{G}\text{L}\text{G}\text{K}\text{G}\text{G}\text{A}\text{K}\text{R}\text{H}\text{R}\text{K}\text{V}\text{L}\text{R}_{23}$  of histone H4 extracted from K562 cells. This peptide is also dimethylated on K20. “ac” and “2me” designate the acetylation and dimethylation sites; “1/2ac” listed in the peptide sequence represents the sites (K5 and K8) that are partially acetylated.

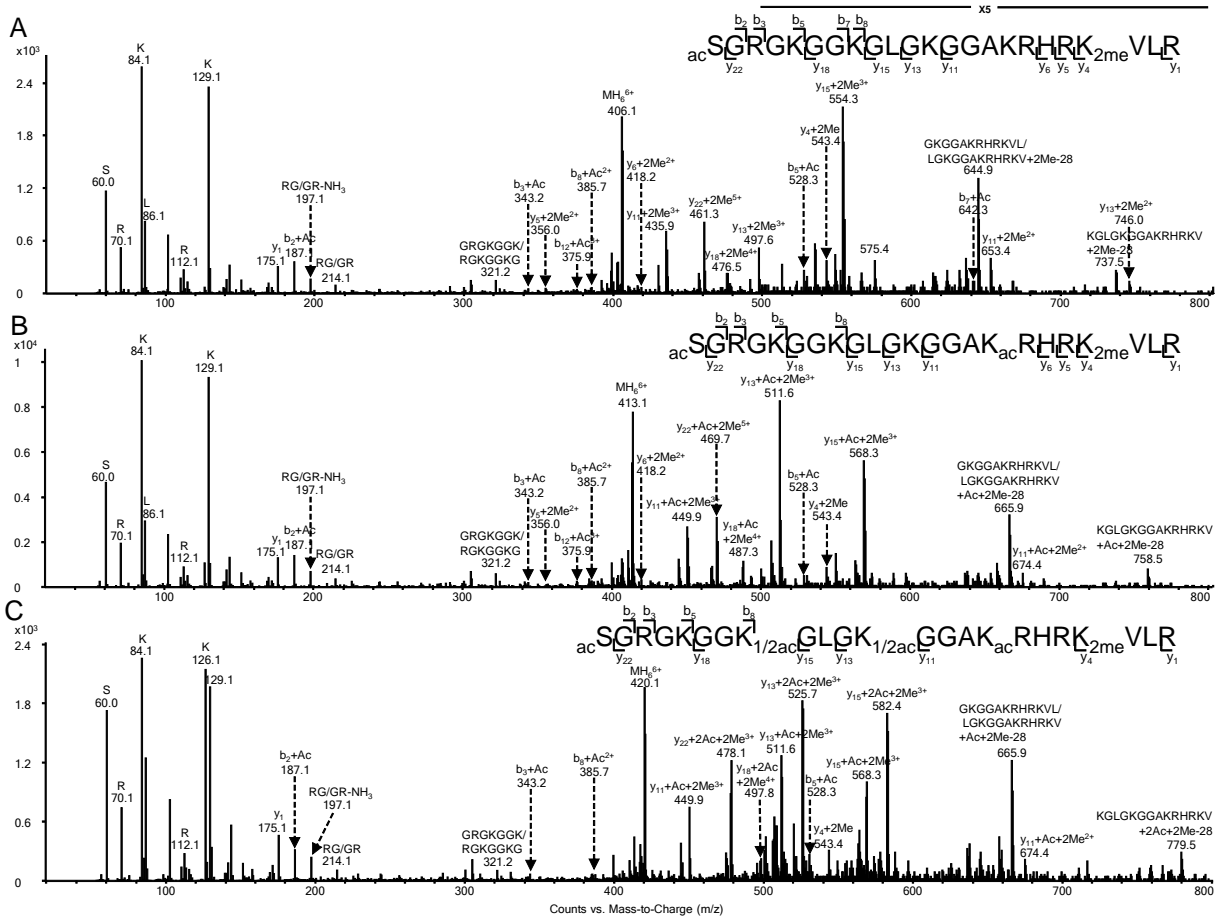

**Table S1.** Detailed results for all the proteins quantified in this study. “S.D.” represents standard deviations calculated based on results from three cycles of SILAC measurements.

| IPI number    | Protein name                                                                       | Peptide number | forward 1 | reverse 2 | reverse 3 | Average | S.D.  |
|---------------|------------------------------------------------------------------------------------|----------------|-----------|-----------|-----------|---------|-------|
| IPI00032561.1 | Calcium-binding protein 39                                                         | 2              | 0.353     |           | 0.438     | 0.396   | 0.060 |
| IPI00002214.1 | Importin alpha-2 subunit                                                           | 6              | 0.505     | 0.535     | 0.524     | 0.521   | 0.015 |
| IPI00221108.4 | Thymidylate synthase                                                               | 2              | 0.485     | 0.513     | 0.569     | 0.522   | 0.043 |
| IPI00011631.5 | Centromere/kinetochore protein zw10 homolog                                        | 1              |           | 0.493     | 0.609     | 0.493   | 0.082 |
| IPI00010349.1 | Alkyldihydroxyacetonephosphate synthase, peroxisomal precursor                     | 2              | 0.504     | 0.642     | 0.524     | 0.557   | 0.075 |
| IPI00013068.1 | Eukaryotic translation initiation factor 3 subunit 6                               | 2              | 0.685     |           | 0.450     | 0.567   | 0.166 |
| IPI00005045.1 | ATP-binding cassette sub-family F member 2                                         | 5              | 0.568     | 0.534     | 0.605     | 0.569   | 0.036 |
| IPI00026182.4 | F-actin capping protein alpha-2 subunit                                            | 2              | 0.508     |           | 0.652     | 0.580   | 0.102 |
| IPI00218505.6 | Protein FAM112B                                                                    | 2              | 0.611     | 0.595     | 0.550     | 0.585   | 0.032 |
| IPI00337602.4 | 56 kDa protein                                                                     | 1              |           | 0.651     | 0.524     | 0.588   | 0.090 |
| IPI00218292.2 | Splice Isoform Short of Ubiquitin fusion degradation protein                       | 4              | 0.758     |           | 0.438     | 0.598   | 0.226 |
| IPI00306043.1 | Splice Isoform 1 of YTH domain protein 2                                           | 1              | 0.588     | 0.611     | 0.602     | 0.600   | 0.011 |
| IPI00009010.3 | UPF0315 protein AD-001                                                             | 2              | 0.660     | 0.549     | 0.609     | 0.606   | 0.055 |
| IPI00743544.1 | 15 kDa protein                                                                     | 1              |           | 0.624     | 0.591     | 0.607   | 0.023 |
| IPI00220113.1 | Splice Isoform 2 of Microtubule-associated protein 4                               | 11             | 0.568     | 0.629     | 0.630     | 0.609   | 0.036 |
| IPI00183294.3 | Nuclear pore complex protein Nup214                                                | 7              | 0.439     | 0.743     | 0.650     | 0.610   | 0.156 |
| IPI00221035.3 | Splice Isoform 1 of Transcription factor BTF3                                      | 3              | 0.559     | 0.702     | 0.577     | 0.612   | 0.078 |
| IPI00291669.3 | Ubiquitin-like domain containing CTD phosphatase 1                                 | 2              | 0.699     | 0.568     | 0.588     | 0.618   | 0.071 |
| IPI00305166.1 | Succinate dehydrogenase [ubiquinone] flavoprotein subunit, mitochondrial precursor | 1              |           | 0.590     | 0.652     | 0.621   | 0.044 |
| IPI00329625.2 | Cell cycle progression 2 protein isoform 1                                         | 2              | 0.794     |           | 0.449     | 0.621   | 0.244 |
| IPI00021266.1 | 60S ribosomal protein L23a                                                         | 9              | 0.613     | 0.764     | 0.510     | 0.629   | 0.128 |
| IPI00009057.1 | Splice Isoform A of Ras-GTPase-activating protein-binding protein 2                | 6              | 0.629     | 0.675     | 0.589     | 0.631   | 0.043 |
| IPI00176692.7 | Heterogeneous nuclear ribonucleoprotein A1                                         | 4              | 0.775     | 0.773     | 0.353     | 0.634   | 0.243 |
| IPI00029266.1 | Small nuclear ribonucleoprotein E                                                  | 2              | 0.368     | 0.763     | 0.780     | 0.637   | 0.233 |

| IPI number     | Protein name                                                                    | Peptide number | forward 1 | reverse 2 | reverse 3 | Average | S.D.  |
|----------------|---------------------------------------------------------------------------------|----------------|-----------|-----------|-----------|---------|-------|
| IPI00017895.2  | Splice Isoform 1 of Glycerol-3-phosphate dehydrogenase, mitochondrial precursor | 3              | 0.573     | 0.708     | 0.630     | 0.637   | 0.068 |
| IPI00012535.1  | DnaJ homolog subfamily A member 1                                               | 3              | 0.813     | 0.608     | 0.502     | 0.641   | 0.158 |
| IPI00299573.11 | 60S ribosomal protein L7a                                                       | 14             | 0.758     | 0.711     | 0.470     | 0.646   | 0.154 |
| IPI00026260.1  | Nucleoside diphosphate kinase B                                                 | 5              |           | 0.489     | 0.806     | 0.648   | 0.224 |
| IPI00013415.1  | 40S ribosomal protein S7                                                        | 8              | 0.714     | 0.435     | 0.801     | 0.650   | 0.191 |
| IPI00027493.1  | 4F2 cell-surface antigen heavy chain                                            | 5              | 0.704     | 0.700     | 0.556     | 0.653   | 0.085 |
| IPI00016910.1  | Eukaryotic translation initiation factor 3 subunit 8                            | 11             | 0.680     | 0.708     | 0.577     | 0.655   | 0.069 |
| IPI00186290.5  | Elongation factor 2                                                             | 31             | 0.649     | 0.688     | 0.630     | 0.656   | 0.030 |
| IPI00012479.1  | FKSG17                                                                          | 1              | 0.617     |           | 0.705     | 0.661   | 0.062 |
| IPI00219155.4  | 60S ribosomal protein L27                                                       | 2              | 0.565     | 0.738     | 0.682     | 0.662   | 0.088 |
| IPI00013495.1  | Splice Isoform 2 of ATP-binding cassette sub-family F                           | 2              | 0.662     | 0.625     | 0.701     | 0.663   | 0.038 |
| IPI00030179.3  | 60S ribosomal protein L7                                                        | 6              | 0.709     | 0.789     | 0.491     | 0.663   | 0.154 |
| IPI00017617.1  | Probable ATP-dependent RNA helicase DDX5                                        | 13             | 0.585     | 0.639     | 0.769     | 0.664   | 0.095 |
| IPI00023748.3  | Nascent polypeptide-associated complex alpha subunit                            | 7              | 0.641     | 0.715     | 0.641     | 0.666   | 0.043 |
| IPI00220373.3  | Insulin-degrading enzyme                                                        | 2              |           | 0.705     | 0.630     | 0.668   | 0.053 |
| IPI00219678.2  | Eukaryotic translation initiation factor 2 subunit 1                            | 2              | 0.642     | 0.581     | 0.780     | 0.668   | 0.102 |
| IPI00397828.2  | 20 kDa protein                                                                  | 1              | 0.651     | 0.658     | 0.694     | 0.668   | 0.023 |
| IPI00444704.2  | Splice Isoform 2 of G-rich sequence factor 1                                    | 1              |           | 0.674     | 0.662     | 0.668   | 0.008 |
| IPI00037619.2  | Ribosomal protein L39 variant                                                   | 1              | 0.694     | 0.699     | 0.611     | 0.668   | 0.050 |
| IPI00219229.2  | U6 snRNA-associated Sm-like protein LSm3                                        | 2              | 0.725     | 0.552     | 0.728     | 0.668   | 0.100 |
| IPI00008475.1  | Hydroxymethylglutaryl-CoA synthase, cytoplasmic                                 | 12             | 0.671     | 0.875     | 0.459     | 0.669   | 0.208 |
| IPI00010157.1  | S-adenosylmethionine synthetase isoform type-2                                  | 4              | 0.676     | 0.674     | 0.658     | 0.669   | 0.010 |
| IPI00000728.3  | Splice Isoform 1 of Ubiquitin carboxyl-terminal hydrolase 15                    | 5              | 0.787     | 0.622     | 0.598     | 0.669   | 0.103 |
| IPI00005658.3  | Ubiquitin-like protein 4A                                                       | 2              | 0.640     | 0.699     |           | 0.670   | 0.042 |
| IPI00023406.1  | Cytochrome c-type heme lyase                                                    | 2              |           |           | 0.673     | 0.673   |       |
| IPI00176527.1  | OTTHUMP00000018178                                                              | 3              |           |           | 0.673     | 0.673   |       |
| IPI00018262.1  | Acidic leucine-rich nuclear phosphoprotein 32 family member C                   | 2              |           | 0.527     | 0.823     | 0.675   | 0.209 |
| IPI00034006.1  | Tyrosine-protein phosphatase non-receptor type 23                               | 1              | 0.676     |           |           | 0.676   |       |
| IPI00373924.1  | PREDICTED: similar to 40S ribosomal protein S3a isoform                         | 2              | 0.690     |           | 0.662     | 0.676   | 0.020 |

| IPI number    | Protein name                                                                     | Peptide number | forward 1 | reverse 2 | reverse 3 | Average | S.D.  |
|---------------|----------------------------------------------------------------------------------|----------------|-----------|-----------|-----------|---------|-------|
| IPI00418471.5 | Vimentin                                                                         | 16             | 0.654     | 0.726     | 0.652     | 0.677   | 0.042 |
| IPI00215965.1 | Heterogeneous nuclear ribonucleoprotein A1 isoform b                             | 3              | 0.730     | 0.726     | 0.577     | 0.678   | 0.087 |
| IPI00012795.3 | Eukaryotic translation initiation factor 3 subunit 2                             | 2              | 0.735     | 0.682     | 0.620     | 0.679   | 0.058 |
| IPI00000494.5 | 60S ribosomal protein L5                                                         | 2              | 0.704     | 0.842     | 0.491     | 0.679   | 0.177 |
| IPI00180292.5 | Splice Isoform 5 of Brain-specific angiogenesis inhibitor 1-associated-protein 2 | 2              | 0.680     |           |           | 0.680   |       |
| IPI00220365.4 | Eukaryotic translation initiation factor 4 gamma, 1 isoform 4                    | 14             | 0.637     | 0.714     | 0.694     | 0.682   | 0.040 |
| IPI00012079.1 | Eukaryotic translation initiation factor 4B                                      | 2              | 0.621     | 0.689     | 0.737     | 0.682   | 0.058 |
| IPI00215719.5 | 60S ribosomal protein L18                                                        | 2              | 0.763     | 0.812     | 0.481     | 0.685   | 0.179 |
| IPI00293474.1 | Eucaryotic translation initiation factor 4G isoform 1                            | 2              | 0.699     |           | 0.677     | 0.688   | 0.016 |
| IPI00007764.3 | Splice Isoform 1 of Hematological and neurological expressed 1 protein           | 2              | 0.690     |           |           | 0.690   |       |
| IPI00430812.4 | Zinc finger protein 9                                                            | 2              | 0.800     | 0.744     | 0.534     | 0.693   | 0.140 |
| IPI00025244.1 | Zinc-finger protein ZPR1                                                         | 1              |           |           | 0.694     | 0.694   |       |
| IPI00031812.2 | Nuclease sensitive element-binding protein 1                                     | 3              | 0.743     | 0.641     | 0.705     | 0.697   | 0.052 |
| IPI00002203.5 | BRCA2 and CDKN1A-interacting protein isoform BCCIPbeta                           | 2              | 0.730     | 0.709     | 0.652     | 0.697   | 0.040 |
| IPI00014424.1 | Elongation factor 1-alpha 2                                                      | 4              | 0.694     | 0.725     | 0.673     | 0.697   | 0.026 |
| IPI00075558.7 | PREDICTED: similar to 60S ribosomal protein L7a                                  | 2              | 0.758     | 0.844     | 0.491     | 0.698   | 0.184 |
| IPI00024650.1 | Monocarboxylate transporter 1                                                    | 1              |           | 0.698     |           | 0.698   |       |
| IPI00011118.2 | Ribonucleoside-diphosphate reductase M2 subunit                                  | 2              | 0.699     |           |           | 0.699   |       |
| IPI00012726.4 | Splice Isoform 1 of Polyadenylate-binding protein 4                              | 4              | 0.781     | 0.642     | 0.684     | 0.702   | 0.071 |
| IPI00022228.1 | Vigilin                                                                          | 2              | 0.833     | 0.575     |           | 0.704   | 0.183 |
| IPI00009335.1 | Brain protein 16                                                                 | 3              | 0.725     |           | 0.684     | 0.704   | 0.029 |
| IPI00215637.4 | ATP-dependent RNA helicase DDX3X                                                 | 7              | 0.588     | 0.824     |           | 0.706   | 0.166 |
| IPI00010700.2 | Splice Isoform 1 of Large proline-rich protein BAT2                              | 2              | 0.685     | 0.727     |           | 0.706   | 0.030 |
| IPI00292020.3 | Spermidine synthase                                                              | 6              | 0.833     | 0.714     | 0.588     | 0.712   | 0.123 |
| IPI00026833.4 | Adenylosuccinate synthetase isozyme 2                                            | 5              | 0.901     | 0.765     | 0.470     | 0.712   | 0.220 |
| IPI00215780.4 | 40S ribosomal protein S19                                                        | 7              | 0.746     | 0.770     | 0.620     | 0.712   | 0.081 |
| IPI00159072.3 | ROD1 regulator of differentiation 1                                              | 2              | 0.893     | 0.550     | 0.694     | 0.713   | 0.172 |
| IPI00329791.7 | Probable ATP-dependent RNA helicase DDX46                                        | 6              |           | 0.713     |           | 0.713   |       |
| IPI00000875.5 | Elongation factor 1-gamma                                                        | 16             | 0.769     | 0.625     | 0.748     | 0.714   | 0.078 |



| IPI number    | Protein name                                                                                   | Peptide number | forward 1 | reverse 2 | reverse 3 | Average | S.D.  |
|---------------|------------------------------------------------------------------------------------------------|----------------|-----------|-----------|-----------|---------|-------|
| IPI00005416.2 | NICE-4 protein                                                                                 | 2              | 0.704     | 0.725     |           | 0.714   | 0.014 |
| IPI00030910.1 | GPI-anchored protein p137                                                                      | 5              | 0.606     | 0.824     |           | 0.715   | 0.154 |
| IPI00005792.1 | Poly(A) binding protein, nuclear 1                                                             | 2              |           |           | 0.716     | 0.716   |       |
| IPI00016912.1 | Tetratricopeptide repeat protein 1                                                             | 2              |           |           | 0.716     | 0.716   |       |
| IPI00025447.6 | EEF1A1 protein                                                                                 | 4              | 0.676     | 0.750     | 0.726     | 0.717   | 0.038 |
| IPI00641950.3 | Lung cancer oncogene 7                                                                         | 10             | 0.714     | 0.789     | 0.652     | 0.718   | 0.069 |
| IPI00024933.3 | 60S ribosomal protein L12                                                                      | 8              | 0.781     | 0.765     | 0.609     | 0.718   | 0.095 |
| IPI00176854.2 | 13 kDa protein                                                                                 | 3              | 0.754     | 0.683     |           | 0.718   | 0.050 |
| IPI00026781.2 | Fatty acid synthase                                                                            | 46             | 0.781     | 0.808     | 0.566     | 0.719   | 0.133 |
| IPI00008524.1 | Splice Isoform 1 of Polyadenylate-binding protein 1                                            | 21             | 0.714     | 0.685     | 0.759     | 0.719   | 0.037 |
| IPI00023860.1 | Nucleosome assembly protein 1-like 1                                                           | 2              | 0.637     | 0.690     | 0.833     | 0.720   | 0.102 |
| IPI00003865.1 | Splice Isoform 1 of Heat shock cognate 71 kDa protein                                          | 92             | 0.680     | 0.700     | 0.780     | 0.720   | 0.053 |
| IPI00647650.2 | Eukaryotic translation initiation factor 3 subunit 3                                           | 3              |           | 0.639     | 0.801     | 0.720   | 0.115 |
| IPI00012750.3 | 40S ribosomal protein S25                                                                      | 3              | 0.775     | 0.756     | 0.630     | 0.720   | 0.079 |
| IPI00029557.3 | GrpE protein homolog 1, mitochondrial precursor                                                | 2              |           | 0.642     | 0.801     | 0.722   | 0.113 |
| IPI00012772.7 | 60S ribosomal protein L8                                                                       | 8              | 0.813     | 0.800     | 0.556     | 0.723   | 0.145 |
| IPI00377261.1 | Splice Isoform 1 of Far upstream element-binding protein 3                                     | 3              |           | 0.723     |           | 0.723   |       |
| IPI00011457.1 | WUGSC:H_RG054D04.1 protein                                                                     | 19             | 0.735     | 0.734     | 0.705     | 0.725   | 0.017 |
| IPI00414860.5 | 60S ribosomal protein L37a                                                                     | 3              |           | 0.726     |           | 0.726   |       |
| IPI00020850.3 | Serine/threonine-protein phosphatase 2A 55 kDa regulatory subunit B beta isoform               | 2              |           |           | 0.726     | 0.726   |       |
| IPI00014919.1 | UTP--glucose-1-phosphate uridylyltransferase 1                                                 | 3              |           |           | 0.726     | 0.726   |       |
| IPI00155940.1 | Importin alpha-7 subunit                                                                       | 2              |           | 0.730     |           | 0.730   |       |
| IPI00029012.1 | Eukaryotic translation initiation factor 3 subunit 10                                          | 7              | 0.800     | 0.695     | 0.694     | 0.730   | 0.061 |
| IPI00003918.5 | 60S ribosomal protein L4                                                                       | 3              | 0.735     | 0.797     | 0.662     | 0.731   | 0.067 |
| IPI00030243.1 | Splice Isoform 1 of Proteasome activator complex subunit 3                                     | 2              | 0.769     | 0.768     | 0.662     | 0.733   | 0.061 |
| IPI00306708.3 | T-lymphokine-activated killer cell-originated protein kinase                                   | 3              | 0.943     |           | 0.524     | 0.733   | 0.297 |
| IPI00654777.2 | Eukaryotic translation initiation factor 3 subunit 5                                           | 4              | 0.847     |           | 0.620     | 0.734   | 0.161 |
| IPI00023461.2 | Myeloid\lymphoid or mixed-lineage leukemia (Trithorax homolog, Drosophila); translocated to, 4 | 3              | 0.802     | 0.601     | 0.798     | 0.734   | 0.115 |
| IPI00221092.7 | 40S ribosomal protein S16                                                                      | 15             | 0.741     | 0.780     | 0.684     | 0.735   | 0.048 |

| IPI number    | Protein name                                                                                                                                               | Peptide number | forward 1 | reverse 2 | reverse 3 | Average | S.D.  |
|---------------|------------------------------------------------------------------------------------------------------------------------------------------------------------|----------------|-----------|-----------|-----------|---------|-------|
| IPI00240909.1 | PREDICTED: similar to eukaryotic translation initiation                                                                                                    | 2              | 0.787     |           | 0.684     | 0.736   | 0.073 |
| IPI00741181.1 | PREDICTED: similar to Heat shock protein HSP 90-beta                                                                                                       | 2              |           |           | 0.737     | 0.737   |       |
| IPI00019407.1 | Sterol-4-alpha-carboxylate 3-dehydrogenase, decarboxylating                                                                                                | 3              |           |           | 0.737     | 0.737   |       |
| IPI00328082.3 | Threonyl-tRNA synthetase-like 2                                                                                                                            | 1              |           |           | 0.737     | 0.737   |       |
| IPI00419919.4 | 60S ribosomal protein L29                                                                                                                                  | 2              | 0.769     | 0.711     |           | 0.740   | 0.041 |
| IPI00397963.3 | 9 kDa protein                                                                                                                                              | 2              |           | 0.741     |           | 0.741   |       |
| IPI00301936.3 | ELAV-like protein 1                                                                                                                                        | 10             | 0.862     | 0.902     | 0.459     | 0.741   | 0.245 |
| IPI00396980.3 | PREDICTED: similar to 60S ribosomal protein L35                                                                                                            | 2              | 0.775     | 0.707     |           | 0.741   | 0.048 |
| IPI00011913.1 | Heterogeneous nuclear ribonucleoprotein A0                                                                                                                 | 3              | 0.806     | 0.676     |           | 0.741   | 0.092 |
| IPI00221091.8 | 40S ribosomal protein S15a                                                                                                                                 | 7              |           | 0.741     |           | 0.741   |       |
| IPI00019770.3 | Ubiquitin-like protein fubi and ribosomal protein S30 precursor                                                                                            | 7              | 0.752     | 0.732     |           | 0.742   | 0.014 |
| IPI00176686.3 | PREDICTED: similar to 60S ribosomal protein L6 (TAX-responsive enhancer element binding protein 107) (TAXREB107) (Neoplasm-related protein C140) isoform 1 | 2              | 0.813     | 0.672     |           | 0.743   | 0.100 |
| IPI00031618.2 | DNA-damage inducible protein 2                                                                                                                             | 2              |           | 0.833     | 0.652     | 0.743   | 0.128 |
| IPI00003505.3 | Splice Isoform 1 of Thyroid receptor-interacting protein 13                                                                                                | 2              | 0.833     |           | 0.652     | 0.743   | 0.128 |
| IPI00022462.1 | Transferrin receptor protein 1                                                                                                                             | 8              | 0.714     | 0.798     | 0.716     | 0.743   | 0.048 |
| IPI00002821.3 | 60S ribosomal protein L14                                                                                                                                  | 8              | 0.781     | 0.733     | 0.716     | 0.744   | 0.034 |
| IPI00014263.1 | Eukaryotic translation initiation factor 4H isoform 1                                                                                                      | 5              | 0.725     | 0.759     | 0.748     | 0.744   | 0.018 |
| IPI00290460.3 | Eukaryotic translation initiation factor 3 subunit 4                                                                                                       | 4              | 0.714     | 0.803     | 0.716     | 0.744   | 0.051 |
| IPI00376798.3 | Ribosomal protein L11                                                                                                                                      | 5              | 0.667     | 0.747     | 0.823     | 0.745   | 0.078 |
| IPI00006181.1 | Eukaryotic translation initiation factor 3 subunit 7                                                                                                       | 4              | 0.870     | 0.621     |           | 0.746   | 0.175 |
| IPI00007144.1 | 60S ribosomal protein L26-like 1                                                                                                                           | 3              | 0.725     | 0.767     |           | 0.746   | 0.030 |
| IPI00016868.2 | Hypothetical protein KIAA0683                                                                                                                              | 2              | 0.746     |           |           | 0.746   |       |
| IPI00419880.5 | 40S ribosomal protein S3a                                                                                                                                  | 6              | 0.763     | 0.664     | 0.812     | 0.747   | 0.075 |
| IPI00166711.4 | FLJ00369 protein (Fragment)                                                                                                                                | 2              |           |           | 0.748     | 0.748   |       |
| IPI00002255.4 | Lipopolysaccharide-responsive and beige-like anchor protein                                                                                                | 2              |           |           | 0.748     | 0.748   |       |
| IPI00329389.6 | DNA-binding protein TAXREB107                                                                                                                              | 8              | 0.752     | 0.853     | 0.641     | 0.749   | 0.106 |
| IPI00219005.2 | FK506-binding protein 4                                                                                                                                    | 6              | 0.855     | 0.652     | 0.748     | 0.751   | 0.101 |
| IPI00027438.2 | Flotillin-1                                                                                                                                                | 2              |           | 0.752     |           | 0.752   |       |
| IPI00029750.1 | Splice Isoform 1 of 40S ribosomal protein S24                                                                                                              | 3              |           | 0.755     |           | 0.755   |       |

| IPI number    | Protein name                                                                                                   | Peptide number | forward 1 | reverse 2 | reverse 3 | Average | S.D.  |
|---------------|----------------------------------------------------------------------------------------------------------------|----------------|-----------|-----------|-----------|---------|-------|
| IPI00020513.2 | Zyxin                                                                                                          | 2              | 0.704     | 0.806     |           | 0.755   | 0.072 |
| IPI00301263.2 | CAD protein                                                                                                    | 10             | 0.699     | 0.778     | 0.791     | 0.756   | 0.050 |
| IPI00175098.5 | PREDICTED: similar to ribosomal protein L10                                                                    | 1              |           | 0.758     |           | 0.758   |       |
| IPI00024781.1 | Small EDRK-rich factor 2                                                                                       | 2              |           | 0.758     |           | 0.758   |       |
| IPI00019383.1 | Galactokinase                                                                                                  | 4              |           |           | 0.759     | 0.759   |       |
| IPI00002212.1 | Splice Isoform B of Serine/threonine-protein kinase 24                                                         | 3              |           |           | 0.759     | 0.759   |       |
| IPI00178440.2 | Elongation factor 1-beta                                                                                       | 1              | 0.826     | 0.789     | 0.662     | 0.759   | 0.086 |
| IPI00026138.3 | PREDICTED: similar to ribosomal protein S3a isoform 1                                                          | 6              | 0.752     | 0.727     | 0.801     | 0.760   | 0.038 |
| IPI00247583.4 | 60S ribosomal protein L21                                                                                      | 3              | 0.758     | 0.766     |           | 0.762   | 0.006 |
| IPI00168262.1 | CDNA PSEC0241 fis, clone NT2RP3000234, moderately similar to Homo sapiens cerebral cell adhesion molecule mRNA | 1              |           | 0.763     |           | 0.763   |       |
| IPI00013296.1 | 40S ribosomal protein S18                                                                                      | 9              | 0.820     | 0.822     | 0.652     | 0.764   | 0.098 |
| IPI00007675.5 | Cytoplasmic dynein 1 light intermediate chain 1                                                                | 2              | 0.877     |           | 0.652     | 0.764   | 0.159 |
| IPI00064328.3 | Protein arginine methyltransferase 5 isoform b                                                                 | 3              |           | 0.867     | 0.662     | 0.765   | 0.145 |
| IPI00025329.1 | 60S ribosomal protein L19                                                                                      | 12             | 0.752     | 0.781     |           | 0.767   | 0.021 |
| IPI00032158.2 | Splice Isoform 2 of NMDA receptor-regulated protein 1                                                          | 2              | 0.775     |           | 0.759     | 0.767   | 0.012 |
| IPI00022143.3 | Splice Isoform 1 of Protein FAM62A                                                                             | 13             | 0.769     | 0.786     | 0.748     | 0.768   | 0.019 |
| IPI00465361.3 | 60S ribosomal protein L13                                                                                      | 7              | 0.763     | 0.806     | 0.737     | 0.769   | 0.035 |
| IPI00031523.3 | Heat shock protein 86 (Fragment)                                                                               | 9              | 0.775     | 0.709     | 0.823     | 0.769   | 0.057 |
| IPI00550021.3 | 60S ribosomal protein L3                                                                                       | 4              | 0.769     |           |           | 0.769   |       |
| IPI00021808.3 | Histidyl-tRNA synthetase                                                                                       | 5              |           |           | 0.769     | 0.769   |       |
| IPI00007402.2 | Importin-7                                                                                                     | 6              | 0.909     |           | 0.630     | 0.770   | 0.197 |
| IPI00305692.4 | Thioredoxin-like protein 1                                                                                     | 3              | 0.909     |           | 0.630     | 0.770   | 0.197 |
| IPI00219512.1 | Splice Isoform 2 of Ubiquitin carboxyl-terminal hydrolase isozyme L5                                           | 2              | 0.926     | 0.806     | 0.577     | 0.770   | 0.177 |
| IPI00022254.4 | Splice Isoform 1 of Autophagy-related protein 3                                                                | 2              | 0.870     |           | 0.673     | 0.771   | 0.139 |
| IPI00025491.1 | Eukaryotic initiation factor 4A-I                                                                              | 11             | 0.787     | 0.779     | 0.748     | 0.772   | 0.021 |
| IPI00302925.3 | T-complex protein 1 subunit theta                                                                              | 26             | 0.840     | 0.748     | 0.726     | 0.772   | 0.060 |
| IPI00221325.3 | Ran-binding protein 2                                                                                          | 2              | 0.645     | 0.898     |           | 0.772   | 0.179 |
| IPI00017763.4 | Nucleosome assembly protein 1-like 4                                                                           | 3              | 0.752     | 0.743     | 0.823     | 0.772   | 0.044 |
| IPI00219673.5 | Glutathione S-transferase kappa 1                                                                              | 5              |           | 0.925     | 0.620     | 0.772   | 0.216 |

| IPI number    | Protein name                                                                                      | Peptide number | forward 1 | reverse 2 | reverse 3 | Average | S.D.  |
|---------------|---------------------------------------------------------------------------------------------------|----------------|-----------|-----------|-----------|---------|-------|
| IPI00216153.6 | 40S ribosomal protein S15                                                                         | 2              | 0.758     | 0.789     |           | 0.773   | 0.022 |
| IPI00025419.5 | PREDICTED: similar to 40S ribosomal protein S3a (V-fos transformation effector protein) isoform 3 | 7              | 0.769     | 0.761     | 0.791     | 0.774   | 0.015 |
| IPI00329745.4 | 130 kDa leucine-rich protein                                                                      | 43             | 0.893     | 0.874     | 0.556     | 0.774   | 0.190 |
| IPI00008529.1 | 60S acidic ribosomal protein P2                                                                   | 10             | 0.763     | 0.726     | 0.833     | 0.774   | 0.055 |
| IPI00013881.5 | Heterogeneous nuclear ribonucleoprotein H1                                                        | 2              | 0.943     | 0.805     | 0.577     | 0.775   | 0.185 |
| IPI00216237.4 | 60S ribosomal protein L36                                                                         | 6              | 0.800     | 0.751     |           | 0.775   | 0.035 |
| IPI00413324.5 | 60S ribosomal protein L17                                                                         | 7              | 0.806     | 0.744     |           | 0.775   | 0.044 |
| IPI00000643.1 | BAG family molecular chaperone regulator 2                                                        | 3              |           | 0.775     |           | 0.775   |       |
| IPI00456889.2 | PREDICTED: similar to Phosphoglycerate mutase 1                                                   | 2              |           | 0.776     |           | 0.776   |       |
| IPI00299214.5 | Thymidine kinase, cytosolic                                                                       | 2              | 0.917     |           | 0.641     | 0.779   | 0.195 |
| IPI00013184.1 | N-terminal acetyltransferase complex ARD1 subunit homolog A                                       | 7              | 0.800     |           | 0.759     | 0.779   | 0.029 |
| IPI00219153.3 | 60S ribosomal protein L22                                                                         | 4              | 0.840     | 0.719     |           | 0.780   | 0.086 |
| IPI00218407.5 | Fructose-bisphosphate aldolase B                                                                  | 2              |           |           | 0.780     | 0.780   |       |
| IPI00304417.6 | Isocitrate dehydrogenase [NAD] subunit beta, mitochondrial precursor                              | 2              |           |           | 0.780     | 0.780   |       |
| IPI00735515.1 | PREDICTED: similar to chaperonin containing TCP1, subunit 8                                       | 2              |           |           | 0.780     | 0.780   |       |
| IPI00412579.5 | 60S ribosomal protein L10a                                                                        | 16             | 0.769     | 0.814     | 0.759     | 0.780   | 0.029 |
| IPI00027270.1 | 60S ribosomal protein L26                                                                         | 2              |           | 0.781     |           | 0.781   |       |
| IPI00012202.1 | Methylosome protein 50                                                                            | 2              | 0.781     |           |           | 0.781   |       |
| IPI00333010.6 | SR-related CTD associated factor 6                                                                | 3              |           | 0.781     |           | 0.781   |       |
| IPI00290142.5 | CTP synthase                                                                                      | 4              | 0.901     | 0.685     | 0.759     | 0.781   | 0.110 |
| IPI00008530.1 | 60S acidic ribosomal protein P0                                                                   | 12             | 0.813     | 0.872     | 0.662     | 0.782   | 0.108 |
| IPI00009943.2 | Tumor protein, translationally-controlled 1                                                       | 3              | 0.862     | 0.880     | 0.609     | 0.784   | 0.152 |
| IPI00328840.7 | THO complex subunit 4                                                                             | 5              | 0.840     | 0.734     | 0.780     | 0.785   | 0.054 |
| IPI00410693.3 | Splice Isoform 1 of Plasminogen activator inhibitor 1 RNA-binding protein                         | 6              | 0.699     | 0.953     | 0.705     | 0.786   | 0.145 |
| IPI00027569.1 | Heterogeneous nuclear ribonucleoprotein C-like 1                                                  | 3              | 0.935     | 0.835     | 0.588     | 0.786   | 0.179 |
| IPI00154473.4 | Elongation factor G 1, mitochondrial precursor                                                    | 2              | 0.855     | 0.926     | 0.577     | 0.786   | 0.185 |
| IPI00026271.4 | 40S ribosomal protein S14                                                                         | 13             | 0.800     | 0.739     | 0.823     | 0.787   | 0.043 |
| IPI00156232.1 | 15 kDa protein                                                                                    | 2              |           | 0.787     |           | 0.787   |       |

| IPI number    | Protein name                                                                                    | Peptide number | forward 1 | reverse 2 | reverse 3 | Average | S.D.    |
|---------------|-------------------------------------------------------------------------------------------------|----------------|-----------|-----------|-----------|---------|---------|
| IPI00056494.4 | 60S ribosomal protein L36a-like                                                                 | 2              | 0.787     |           |           | 0.787   |         |
| IPI00001453.2 | Alpha-internexin                                                                                | 3              | 0.787     |           |           | 0.787   |         |
| IPI00006408.3 | ENOS interacting protein                                                                        | 2              | 0.787     |           |           | 0.787   |         |
| IPI00008809.1 | GAGE-7 protein                                                                                  | 2              |           | 0.787     |           | 0.787   |         |
| IPI00300620.3 | Interferon-induced transmembrane protein 1                                                      | 2              |           | 0.787     |           | 0.787   |         |
| IPI00001589.1 | Mitochondrial import inner membrane translocase subunit Tim13                                   | 2              |           | 0.787     |           | 0.787   |         |
| IPI00013721.2 | Serine/threonine-protein kinase PRP4 homolog                                                    | 2              | 0.787     |           |           | 0.787   |         |
| IPI00182533.4 | 60S ribosomal protein L28                                                                       | 12             |           | 0.789     |           | 0.789   |         |
| IPI00015018.1 | Inorganic pyrophosphatase                                                                       | 5              | 0.826     | 0.761     | 0.780     | 0.789   | 0.034   |
| IPI00013917.1 | 40S ribosomal protein S12                                                                       | 10             |           | 0.788     | 0.791     | 0.789   | 0.002   |
| IPI00030706.1 | Activator of 90 kDa heat shock protein ATPase homolog 1                                         | 2              | 0.971     | 0.778     | 0.620     | 0.789   | 0.176   |
| IPI00026302.3 | 60S ribosomal protein L31                                                                       | 5              | 0.746     | 0.790     | 0.833     | 0.790   | 0.044   |
| IPI00004208.4 | PREDICTED: similar to eukaryotic translation initiation factor 3, subunit 6 interacting protein | 3              |           |           | 0.791     | 0.791   | #DIV/0! |
| IPI00179964.5 | Splice Isoform 1 of Polypyrimidine tract-binding protein 1                                      | 2              | 0.847     | 0.883     | 0.641     | 0.791   | 0.131   |
| IPI00006640.3 | Serpin I2 precursor                                                                             | 2              | 0.974     |           | 0.609     | 0.791   | 0.258   |
| IPI00329200.6 | Importin beta-3                                                                                 | 4              | 0.926     | 0.811     | 0.641     | 0.793   | 0.143   |
| IPI00335061.6 | Pyrroline-5-carboxylate reductase family, member 2                                              | 2              | 0.667     | 0.890     | 0.823     | 0.793   | 0.115   |
| IPI00334587.1 | Splice Isoform 2 of Heterogeneous nuclear ribonucleoprotein A/B                                 | 3              | 0.962     | 0.767     | 0.652     | 0.793   | 0.157   |
| IPI00398121.5 | Hypothetical protein DKFZp779B0247                                                              | 2              | 0.794     |           |           | 0.794   |         |
| IPI00397611.1 | PREDICTED: similar to ribosomal protein L13 isoform 1                                           | 13             | 0.763     | 0.744     | 0.876     | 0.794   | 0.071   |
| IPI00252294.2 | PREDICTED: similar to 60S ribosomal protein L35                                                 | 4              | 0.855     | 0.735     |           | 0.795   | 0.085   |
| IPI00032879.1 | Adenylate kinase isoenzyme 6                                                                    | 2              |           | 0.795     |           | 0.795   |         |
| IPI00396435.2 | DEAH (Asp-Glu-Ala-His) box polypeptide 15                                                       | 2              |           | 0.795     |           | 0.795   |         |
| IPI00386189.2 | Splice Isoform 1 of NMDA receptor-regulated protein 1                                           | 3              | 0.885     |           | 0.705     | 0.795   | 0.127   |
| IPI00008433.3 | 40S ribosomal protein S5                                                                        | 5              | 0.833     | 0.826     | 0.726     | 0.795   | 0.060   |
| IPI00008438.1 | 40S ribosomal protein S10                                                                       | 12             | 0.833     | 0.741     | 0.812     | 0.795   | 0.048   |
| IPI00035167.7 | PREDICTED: similar to ribosomal protein L10a                                                    | 3              | 0.746     | 0.863     | 0.780     | 0.796   | 0.060   |
| IPI00009328.2 | Probable ATP-dependent RNA helicase DDX48                                                       | 2              | 0.826     | 0.668     | 0.897     | 0.797   | 0.117   |
| IPI00550746.4 | Nuclear migration protein nudC                                                                  | 6              | 0.781     | 0.810     | 0.801     | 0.798   | 0.015   |
| IPI00221300.2 | Translation initiation factor eIF-2B alpha subunit                                              | 5              | 0.870     |           | 0.726     | 0.798   | 0.101   |

| IPI number    | Protein name                                                        | Peptide number | forward 1 | reverse 2 | reverse 3 | Average | S.D.  |
|---------------|---------------------------------------------------------------------|----------------|-----------|-----------|-----------|---------|-------|
| IPI00219160.2 | 60S ribosomal protein L34                                           | 2              |           | 0.798     |           | 0.798   |       |
| IPI00022648.2 | Eukaryotic translation initiation factor 5                          | 3              | 0.787     | 0.775     | 0.833     | 0.799   | 0.031 |
| IPI00106642.4 | Dihydropyrimidinase-like 2                                          | 2              |           | 0.799     |           | 0.799   |       |
| IPI00397774.2 | PREDICTED: similar to laminin receptor 1                            | 3              | 0.714     | 0.754     | 0.929     | 0.799   | 0.115 |
| IPI00017596.2 | Microtubule-associated protein RP/EB family member 1                | 3              | 0.840     | 0.724     | 0.833     | 0.799   | 0.065 |
| IPI00014238.2 | Lysyl-tRNA synthetase                                               | 5              | 0.952     | 0.773     | 0.673     | 0.799   | 0.142 |
| IPI00165506.4 | Polymerase delta-interacting protein 2                              | 2              | 0.862     |           | 0.737     | 0.800   | 0.088 |
| IPI00017870.1 | OTTHUMP00000021786                                                  | 4              | 0.800     |           |           | 0.800   |       |
| IPI00017963.1 | Small nuclear ribonucleoprotein Sm D2                               | 12             |           | 0.800     |           | 0.800   |       |
| IPI00334775.5 | Hypothetical protein DKFZp761K0511                                  | 86             | 0.758     | 0.768     | 0.876     | 0.801   | 0.066 |
| IPI00006377.2 | PNAS-110                                                            | 2              |           |           | 0.801     | 0.801   |       |
| IPI00005605.4 | Splice Isoform 1 of Protein NDRG3                                   | 2              |           |           | 0.801     | 0.801   |       |
| IPI00030275.5 | Heat shock protein 75 kDa, mitochondrial precursor                  | 21             | 0.909     | 0.864     | 0.630     | 0.801   | 0.150 |
| IPI00556589.2 | PREDICTED: similar to 40S ribosomal protein S28                     | 8              | 0.813     | 0.726     | 0.865     | 0.801   | 0.071 |
| IPI00646304.3 | Peptidylprolyl isomerase B precursor                                | 8              |           | 0.802     |           | 0.802   |       |
| IPI00008293.4 | PREDICTED: similar to 40S ribosomal protein S7                      | 7              |           | 0.783     | 0.823     | 0.803   | 0.028 |
| IPI00004534.3 | Phosphoribosylformylglycinamide synthase                            | 10             | 0.917     | 0.820     | 0.673     | 0.803   | 0.123 |
| IPI00013485.3 | 40S ribosomal protein S2                                            | 10             | 0.794     | 0.764     | 0.855     | 0.804   | 0.046 |
| IPI00183169.5 | ACF7 protein                                                        | 3              |           | 0.804     |           | 0.804   |       |
| IPI00024821.1 | 26S proteasome non-ATPase regulatory subunit 14                     | 3              | 1.020     | 0.774     | 0.620     | 0.805   | 0.202 |
| IPI00008552.6 | Thioredoxin-like protein 2                                          | 2              | 0.840     |           | 0.769     | 0.805   | 0.050 |
| IPI00154451.5 | Splice Isoform 1 of MMS19-like protein                              | 2              | 0.806     |           |           | 0.806   |       |
| IPI00748920.1 | Splicing coactivator subunit SRm300                                 | 15             | 0.820     | 0.797     |           | 0.808   | 0.016 |
| IPI00003519.1 | 116 kDa U5 small nuclear ribonucleoprotein component                | 10             | 0.769     | 0.908     | 0.748     | 0.808   | 0.087 |
| IPI00216106.3 | Splice Isoform 3 of Putative GTP-binding protein PTD004             | 2              | 0.885     | 0.846     | 0.694     | 0.808   | 0.101 |
| IPI00216592.1 | Splice Isoform C1 of Heterogeneous nuclear ribonucleoproteins C1/C2 | 4              | 0.877     | 0.984     | 0.566     | 0.809   | 0.217 |
| IPI00016572.1 | Small nuclear ribonucleoprotein G                                   | 1              |           | 0.810     |           | 0.810   |       |
| IPI00395694.1 | Splice Isoform 2 of Transportin 3                                   | 6              | 0.926     |           | 0.694     | 0.810   | 0.164 |
| IPI00394699.1 | Ribosomal protein homolog PD-1                                      | 7              | 0.769     | 0.852     |           | 0.811   | 0.058 |
| IPI00221093.6 | 40S ribosomal protein S17                                           | 4              | 0.847     | 0.775     |           | 0.811   | 0.051 |

| IPI number    | Protein name                                                                                 | Peptide number | forward 1 | reverse 2 | reverse 3 | Average | S.D.  |
|---------------|----------------------------------------------------------------------------------------------|----------------|-----------|-----------|-----------|---------|-------|
| IPI00176696.1 | PREDICTED: similar to 40S ribosomal protein S26                                              | 2              |           | 0.813     |           | 0.813   |       |
| IPI00399036.1 | PREDICTED: similar to 40S ribosomal protein SA (p40)                                         | 2              | 0.813     |           |           | 0.813   |       |
| IPI00290566.1 | T-complex protein 1 subunit alpha                                                            | 16             | 0.855     | 0.861     | 0.726     | 0.814   | 0.076 |
| IPI00025333.4 | Splice Isoform 3 of Anamorsin                                                                | 1              | 0.775     | 1.069     | 0.598     | 0.814   | 0.238 |
| IPI00218606.6 | 40S ribosomal protein S23                                                                    | 6              |           | 0.815     |           | 0.815   |       |
| IPI00396370.5 | Splice Isoform 1 of Eukaryotic translation initiation factor 3 subunit 9                     | 7              | 0.855     | 0.906     | 0.684     | 0.815   | 0.117 |
| IPI00011253.3 | 40S ribosomal protein S3                                                                     | 6              | 0.769     | 0.812     | 0.865     | 0.815   | 0.048 |
| IPI00419373.1 | Splice Isoform 1 of Heterogeneous nuclear ribonucleoprotein A3                               | 2              | 0.862     | 0.771     |           | 0.816   | 0.065 |
| IPI00414127.3 | Ran-specific GTPase-activating protein                                                       | 2              | 0.877     | 0.793     | 0.780     | 0.817   | 0.053 |
| IPI00010720.1 | T-complex protein 1 subunit epsilon                                                          | 22             | 0.870     | 0.843     | 0.737     | 0.817   | 0.070 |
| IPI00304612.8 | 60S ribosomal protein L13a                                                                   | 10             | 0.800     | 0.835     |           | 0.817   | 0.024 |
| IPI00005969.1 | F-actin capping protein alpha-1 subunit                                                      | 3              | 0.813     | 0.752     | 0.887     | 0.817   | 0.067 |
| IPI00011916.1 | Multisynthetase complex auxiliary component p38                                              | 2              | 0.909     |           | 0.726     | 0.818   | 0.129 |
| IPI00024364.2 | Transportin-1                                                                                | 2              | 0.893     | 0.901     | 0.662     | 0.819   | 0.135 |
| IPI00018140.3 | Splice Isoform 1 of Heterogeneous nuclear ribonucleoprotein Q                                | 5              | 0.870     | 0.895     | 0.694     | 0.820   | 0.109 |
| IPI00294701.1 | CDK-activating kinase assembly factor MAT1                                                   | 2              | 0.820     |           |           | 0.820   |       |
| IPI00550821.2 | Splice Isoform 1 of Cleavage and polyadenylation specificity factor 7                        | 2              | 0.820     |           |           | 0.820   |       |
| IPI00303207.3 | ATP-binding cassette sub-family E member 1                                                   | 4              |           | 0.771     | 0.870     | 0.820   | 0.070 |
| IPI00297779.6 | T-complex protein 1 subunit beta                                                             | 35             | 0.893     | 0.874     | 0.694     | 0.820   | 0.110 |
| IPI00015029.1 | Prostaglandin E synthase 3                                                                   | 7              |           | 0.840     | 0.801     | 0.821   | 0.027 |
| IPI00304596.3 | Non-POU domain-containing octamer-binding protein                                            | 8              | 0.833     | 0.808     |           | 0.821   | 0.018 |
| IPI00386854.5 | HNRPA2B1 protein                                                                             | 16             | 0.971     | 0.937     | 0.556     | 0.821   | 0.231 |
| IPI00418497.1 | Splice Isoform 2 of Import inner membrane translocase subunit TIM50, mitochondrial precursor | 2              | 1.136     | 0.508     |           | 0.822   | 0.445 |
| IPI00106491.3 | mRNA turnover protein 4 homolog                                                              | 2              | 0.833     | 0.815     |           | 0.824   | 0.013 |
| IPI00299085.2 | Melanoma-associated antigen C1                                                               | 2              | 0.855     | 0.794     |           | 0.824   | 0.043 |
| IPI00062151.4 | PREDICTED: similar to ribosomal protein L15                                                  | 2              |           | 0.824     |           | 0.824   |       |
| IPI00026958.4 | Splice Isoform Short of NADPH:adrenodoxin oxidoreductase, mitochondrial precursor            | 2              | 1.042     |           | 0.609     | 0.825   | 0.306 |
| IPI00006362.1 | Splice Isoform 2 of Endothelial differentiation-related factor 1                             | 4              |           | 0.826     |           | 0.826   |       |

| IPI number    | Protein name                                                                        | Peptide number | forward 1 | reverse 2 | reverse 3 | Average | S.D.  |
|---------------|-------------------------------------------------------------------------------------|----------------|-----------|-----------|-----------|---------|-------|
| IPI00169434.3 | Grb10 interacting GYF protein 2                                                     | 2              | 0.826     |           |           | 0.826   |       |
| IPI00306301.1 | Pyruvate dehydrogenase E1 component alpha subunit, somatic form, mitochondrial      | 3              | 0.826     |           |           | 0.826   |       |
| IPI00218342.9 | C-1-tetrahydrofolate synthase, cytoplasmic                                          | 3              | 0.862     | 0.882     | 0.737     | 0.827   | 0.078 |
| IPI00031691.1 | 60S ribosomal protein L9                                                            | 4              | 0.709     | 0.896     | 0.876     | 0.827   | 0.103 |
| IPI00373913.2 | PREDICTED: KIAA1447 protein                                                         | 3              |           | 0.833     | 0.823     | 0.828   | 0.007 |
| IPI00183526.5 | NCL protein                                                                         | 10             | 0.901     | 0.824     | 0.759     | 0.828   | 0.071 |
| IPI00396378.3 | Splice Isoform B1 of Heterogeneous nuclear ribonucleoproteins A2/B1                 | 15             | 0.926     | 0.899     | 0.662     | 0.829   | 0.145 |
| IPI00006482.1 | Splice Isoform Long of Sodium/potassium-transporting ATPase alpha-1 chain precursor | 6              | 0.926     | 0.901     | 0.662     | 0.830   | 0.146 |
| IPI00010153.5 | 60S ribosomal protein L23                                                           | 2              | 0.781     | 0.855     | 0.855     | 0.830   | 0.042 |
| IPI00398958.1 | PREDICTED: similar to 40S ribosomal protein SA                                      | 12             | 0.758     | 0.783     | 0.951     | 0.831   | 0.105 |
| IPI00027193.2 | Splice Isoform 2 of Chloride intracellular channel protein 5                        | 2              |           | 0.989     | 0.673     | 0.831   | 0.224 |
| IPI00012442.1 | Ras-GTPase-activating protein-binding protein 1                                     | 2              | 0.637     | 0.906     | 0.951     | 0.831   | 0.170 |
| IPI00306369.3 | NOL1/NOP2/Sun domain family 2 protein                                               | 5              | 0.714     |           | 0.951     | 0.833   | 0.167 |
| IPI00006246.1 | Cell cycle progression 2 protein                                                    | 2              | 0.833     |           |           | 0.833   |       |
| IPI00218829.8 | G1 to S phase transition protein 1 homolog                                          | 5              |           |           | 0.833     | 0.833   |       |
| IPI00064765.2 | 60S ribosomal protein L10-like                                                      | 6              | 0.781     | 0.885     | 0.833     | 0.833   | 0.052 |
| IPI00171438.2 | Thioredoxin domain-containing protein 5 precursor                                   | 1              | 0.862     | 0.901     | 0.737     | 0.833   | 0.086 |
| IPI00221088.4 | 40S ribosomal protein S9                                                            | 2              | 0.926     | 0.849     | 0.726     | 0.834   | 0.101 |
| IPI00022305.4 | MSTP017                                                                             | 2              | 0.862     | 0.806     |           | 0.834   | 0.039 |
| IPI00163782.2 | Splice Isoform 2 of Far upstream element-binding protein 1                          | 12             | 1.042     | 0.852     | 0.609     | 0.834   | 0.217 |
| IPI00009922.3 | DC50                                                                                | 7              |           | 0.835     |           | 0.835   |       |
| IPI00429191.2 | Eukaryotic peptide chain release factor subunit 1                                   | 2              | 0.847     | 0.781     | 0.876     | 0.835   | 0.049 |
| IPI00003021.1 | Sodium/potassium-transporting ATPase alpha-2 chain precursor                        | 5              | 0.926     | 0.919     | 0.662     | 0.836   | 0.150 |
| IPI00182289.5 | 40S ribosomal protein S29                                                           | 4              | 0.847     | 0.825     |           | 0.836   | 0.016 |
| IPI00329633.5 | Threonyl-tRNA synthetase, cytoplasmic                                               | 9              | 0.980     | 0.824     | 0.705     | 0.836   | 0.138 |
| IPI00031801.4 | Splice Isoform 1 of DNA-binding protein A                                           | 2              | 0.625     | 1.050     |           | 0.838   | 0.301 |
| IPI00025273.1 | Splice Isoform Long of Trifunctional purine biosynthetic protein adenosine-3        | 6              | 0.909     | 0.890     | 0.716     | 0.838   | 0.106 |
| IPI00026202.1 | 60S ribosomal protein L18a                                                          | 3              |           | 0.839     |           | 0.839   |       |



| IPI number        | Protein name                                                                                                | Peptide number | forward 1 | reverse 2 | reverse 3 | Average | S.D.  |
|-------------------|-------------------------------------------------------------------------------------------------------------|----------------|-----------|-----------|-----------|---------|-------|
| IPI00169288.3     | Splice Isoform 2 of Retinal dehydrogenase 2                                                                 | 6              | 0.909     | 0.850     | 0.759     | 0.839   | 0.076 |
| IPI00216587.8     | 40S ribosomal protein S8                                                                                    | 4              | 0.787     | 0.814     | 0.919     | 0.840   | 0.070 |
| IPI00419979.2     | p21-activated kinase 2                                                                                      | 2              | 0.840     |           |           | 0.840   |       |
| IPI00376817.1     | PREDICTED: similar to 60S ribosomal protein L32                                                             | 2              |           | 0.840     |           | 0.840   |       |
| IPI00375370.1     | SEC13-like 1 isoform a                                                                                      | 2              | 0.840     |           |           | 0.840   |       |
| IPI00329351.5     | P60, 60-kDa heat shock protein, HSP60 (Fragment)                                                            | 2              |           | 0.840     |           | 0.840   |       |
| IPI00018627.1     | CDNA FLJ13194 fis, clone NT2RP3004378, weakly similar to Drosophila melanogaster separation anxiety protein | 3              | 0.962     | 0.722     |           | 0.842   | 0.170 |
| REV_37799_Protein | no description                                                                                              | 2              | 1.032     |           | 0.652     | 0.842   | 0.269 |
| IPI00029534.1     | Amidophosphoribosyltransferase precursor                                                                    | 1              |           | 0.990     | 0.694     | 0.842   | 0.209 |
| IPI00023048.3     | Elongation factor 1-delta                                                                                   | 7              | 1.000     | 0.770     | 0.759     | 0.843   | 0.136 |
| IPI00010415.2     | Splice Isoform 1 of Cytosolic acyl coenzyme A thioester hydrolase                                           | 2              |           | 0.843     |           | 0.843   |       |
| IPI00295485.1     | Heat shock 70 kDa protein 4L                                                                                | 7              |           |           | 0.844     | 0.844   |       |
| IPI00302927.5     | T-complex protein 1 subunit delta                                                                           | 34             | 0.885     | 0.859     | 0.791     | 0.845   | 0.049 |
| IPI00012493.1     | 40S ribosomal protein S20                                                                                   | 4              | 0.917     | 0.763     | 0.855     | 0.845   | 0.078 |
| IPI00006252.3     | Multisynthetase complex auxiliary component p43                                                             | 7              | 0.943     |           | 0.748     | 0.846   | 0.138 |
| IPI00221089.4     | 40S ribosomal protein S13                                                                                   | 12             | 0.893     | 0.799     |           | 0.846   | 0.066 |
| IPI00290770.3     | Chaperonin containing TCP1, subunit 3 isoform b                                                             | 33             | 0.893     | 0.823     | 0.823     | 0.846   | 0.041 |
| IPI00218993.1     | Splice Isoform Beta of Heat-shock protein 105 kDa                                                           | 1              | 0.833     | 1.000     | 0.705     | 0.846   | 0.148 |
| IPI00000684.4     | Splice Isoform AGX2 of UDP-N-acetylhexosamine pyrophosphorylase                                             | 3              | 0.775     | 0.856     | 0.908     | 0.846   | 0.067 |
| IPI00002149.1     | GTP-binding protein SAR1b                                                                                   | 2              |           | 0.828     | 0.865     | 0.846   | 0.027 |
| IPI00022744.5     | Splice Isoform 1 of Importin-alpha re-exporter                                                              | 3              | 0.943     | 0.944     | 0.652     | 0.846   | 0.169 |
| IPI00301204.2     | Retinol dehydrogenase 13                                                                                    | 2              | 0.826     | 1.042     | 0.673     | 0.847   | 0.185 |
| IPI00025178.3     | Breast carcinoma amplified sequence 2                                                                       | 2              |           | 0.847     |           | 0.847   |       |
| IPI00295098.3     | Signal recognition particle receptor beta subunit                                                           | 1              | 0.826     | 0.870     |           | 0.848   | 0.031 |
| IPI00398135.2     | PREDICTED: similar to 60S ribosomal protein L27a                                                            | 3              | 0.917     | 0.731     | 0.897     | 0.849   | 0.102 |
| IPI00022970.4     | Nucleoprotein TPR                                                                                           | 6              | 0.901     | 0.972     | 0.673     | 0.849   | 0.156 |
| IPI00012200.1     | MGC2477 protein                                                                                             | 3              |           | 0.850     |           | 0.850   |       |
| IPI00017342.1     | Rho-related GTP-binding protein RhoG precursor                                                              | 5              |           | 0.850     |           | 0.850   |       |
| IPI00006052.3     | Prefoldin subunit 2                                                                                         | 4              |           | 0.793     | 0.908     | 0.850   | 0.082 |

| IPI number    | Protein name                                                                     | Peptide number | forward 1 | reverse 2 | reverse 3 | Average | S.D.  |
|---------------|----------------------------------------------------------------------------------|----------------|-----------|-----------|-----------|---------|-------|
| IPI00011603.2 | 26S proteasome non-ATPase regulatory subunit 3                                   | 2              | 0.926     | 1.027     | 0.598     | 0.851   | 0.224 |
| IPI00029731.8 | 60S ribosomal protein L35a                                                       | 3              |           | 0.851     |           | 0.851   |       |
| IPI00027626.2 | T-complex protein 1 subunit zeta                                                 | 25             | 0.901     | 0.895     | 0.759     | 0.851   | 0.080 |
| IPI00021840.1 | 40S ribosomal protein S6                                                         | 11             | 0.794     | 0.778     | 0.983     | 0.852   | 0.114 |
| IPI00397431.3 | PREDICTED: similar to monoacylglycerol O-acyltransferase 2                       | 5              | 0.787     | 0.776     | 0.994     | 0.852   | 0.122 |
| IPI00000873.3 | Valyl-tRNA synthetase                                                            | 17             | 1.010     | 0.821     | 0.726     | 0.853   | 0.144 |
| IPI00003783.1 | Dual specificity mitogen-activated protein kinase kinase 2                       | 2              | 0.926     |           | 0.780     | 0.853   | 0.103 |
| IPI00015351.1 | AD039                                                                            | 1              |           | 0.854     |           | 0.854   |       |
| IPI00001091.3 | AFG3-like protein 2                                                              | 3              | 0.855     |           |           | 0.855   |       |
| IPI00293817.3 | Gamma-soluble NSF attachment protein                                             | 3              | 0.855     |           |           | 0.855   |       |
| IPI00031583.2 | Hypothetical protein DKFZp451D234                                                | 2              |           |           | 0.855     | 0.855   |       |
| IPI00009946.4 | Mitochondrial import receptor subunit TOM34                                      | 6              | 0.855     |           |           | 0.855   |       |
| IPI00103415.1 | Signal transducer and activator of transcription 5B                              | 4              |           |           | 0.855     | 0.855   |       |
| IPI00306332.4 | 60S ribosomal protein L24                                                        | 12             | 0.840     | 0.848     | 0.876     | 0.855   | 0.019 |
| IPI00444262.1 | CDNA FLJ45706 fis, clone FEBRA2028457, highly similar to Nucleolin               | 15             | 0.885     | 0.917     | 0.769     | 0.857   | 0.078 |
| IPI00019599.1 | Splice Isoform 1 of Ubiquitin-conjugating enzyme E2 variant 1                    | 3              |           | 0.857     |           | 0.857   |       |
| IPI00013847.4 | Ubiquinol-cytochrome-c reductase complex core protein I, mitochondrial precursor | 2              | 0.935     |           | 0.780     | 0.857   | 0.109 |
| IPI00001734.2 | Splice Isoform 1 of Phosphoserine aminotransferase                               | 6              | 1.042     |           | 0.673     | 0.857   | 0.261 |
| IPI00373857.1 | PREDICTED: similar to laminin receptor 1                                         | 2              | 0.885     | 0.792     | 0.897     | 0.858   | 0.058 |
| IPI00644127.1 | Isoleucyl-tRNA synthetase, cytoplasmic                                           | 2              | 0.926     | 0.794     |           | 0.860   | 0.094 |
| IPI00219913.9 | Ubiquitin carboxyl-terminal hydrolase 14                                         | 5              | 1.087     | 0.821     | 0.673     | 0.860   | 0.210 |
| IPI00082831.3 | 130 kDa protein                                                                  | 2              | 0.952     | 1.000     | 0.630     | 0.861   | 0.201 |
| IPI00171903.1 | Heterogeneous nuclear ribonucleoprotein M isoform a                              | 29             | 0.840     | 0.882     |           | 0.861   | 0.030 |
| IPI00017297.1 | Matrin-3                                                                         | 31             | 0.901     | 0.925     | 0.759     | 0.861   | 0.090 |
| IPI00472102.3 | Heat shock protein 60                                                            | 64             | 0.952     | 0.895     | 0.737     | 0.861   | 0.111 |
| IPI00219034.2 | NADH dehydrogenase [ubiquinone] 1 alpha subcomplex subun                         | 2              | 0.862     |           |           | 0.862   |       |
| IPI00026167.2 | NHP2-like protein 1                                                              | 2              |           | 0.862     |           | 0.862   |       |
| IPI00396437.3 | Splice Isoform 2 of Drebrin-like protein                                         | 2              |           | 0.862     |           | 0.862   |       |
| IPI00015139.4 | PREDICTED: similar to Heterogeneous nuclear ribonucleoprotein                    | 8              | 0.833     | 0.867     | 0.887     | 0.862   | 0.027 |

| IPI number    | Protein name                                                                                      | Peptide number | forward 1 | reverse 2 | reverse 3 | Average | S.D.  |
|---------------|---------------------------------------------------------------------------------------------------|----------------|-----------|-----------|-----------|---------|-------|
|               | A1 isoform 1                                                                                      |                |           |           |           |         |       |
| IPI00177008.1 | IMP dehydrogenase/GMP reductase family protein                                                    | 1              | 0.935     |           | 0.791     | 0.863   | 0.102 |
| IPI00217223.1 | Multifunctional protein ADE2                                                                      | 18             | 0.935     | 0.799     | 0.855     | 0.863   | 0.068 |
| IPI00376005.1 | Eukaryotic initiation factor 5A isoform I variant A                                               | 2              |           | 0.989     | 0.737     | 0.863   | 0.178 |
| IPI00291510.3 | Inosine-5'-monophosphate dehydrogenase 2                                                          | 12             | 0.847     | 0.835     | 0.908     | 0.864   | 0.039 |
| IPI00302850.4 | Small nuclear ribonucleoprotein Sm D1                                                             | 5              | 0.952     | 0.838     | 0.801     | 0.864   | 0.079 |
| IPI00021187.3 | RuvB-like 1                                                                                       | 4              | 0.877     | 0.871     | 0.844     | 0.864   | 0.018 |
| IPI00009104.6 | RuvB-like 2                                                                                       | 3              | 0.847     | 0.720     | 1.026     | 0.864   | 0.154 |
| IPI00376667.3 | PREDICTED: similar to 40S ribosomal protein S3a (V-fos transformation effector protein) isoform 1 | 3              | 0.952     | 0.777     |           | 0.865   | 0.124 |
| IPI00337385.1 | Splice Isoform 1 of Pre-mRNA-processing factor 40 homolog A                                       | 3              | 1.000     | 0.729     |           | 0.865   | 0.191 |
| IPI00170935.1 | Leucine-rich repeat-containing protein 47                                                         | 3              | 0.971     | 0.919     | 0.705     | 0.865   | 0.141 |
| IPI00076042.2 | Short heat shock protein 60 Hsp60s2                                                               | 6              | 0.935     | 0.860     | 0.801     | 0.865   | 0.067 |
| IPI00148061.3 | L-lactate dehydrogenase A-like 6A                                                                 | 2              | 0.943     | 0.862     | 0.791     | 0.865   | 0.076 |
| IPI00645194.1 | Integrin beta 1 isoform 1A precursor                                                              | 2              |           |           | 0.865     | 0.865   |       |
| IPI00019812.1 | Serine/threonine-protein phosphatase 5                                                            | 2              |           |           | 0.865     | 0.865   |       |
| IPI00234368.1 | Splice Isoform Short of Adenosine kinase                                                          | 9              |           |           | 0.865     | 0.865   |       |
| IPI00012048.1 | Nucleoside diphosphate kinase A                                                                   | 8              | 0.893     | 0.732     | 0.972     | 0.866   | 0.122 |
| IPI00024719.1 | Histone acetyltransferase type B catalytic subunit                                                | 10             | 0.813     |           | 0.919     | 0.866   | 0.075 |
| IPI00219156.6 | 60S ribosomal protein L30                                                                         | 9              | 0.952     | 0.791     | 0.855     | 0.866   | 0.081 |
| IPI00217030.9 | 40S ribosomal protein S4, X isoform                                                               | 23             | 0.833     | 0.763     | 1.004     | 0.867   | 0.124 |
| IPI00299254.3 | Eukaryotic translation initiation factor 5B                                                       | 5              | 0.746     | 0.787     | 1.068     | 0.867   | 0.175 |
| IPI00019600.2 | Ubiquitin-conjugating enzyme E2 variant 2                                                         | 1              |           | 0.667     | 1.068     | 0.868   | 0.284 |
| IPI00395627.3 | Splice Isoform 1 of Calcyclin-binding protein                                                     | 19             | 0.926     | 0.933     | 0.748     | 0.869   | 0.105 |
| IPI00026513.5 | Ribose 5-phosphate isomerase A                                                                    | 2              |           | 0.990     | 0.748     | 0.869   | 0.171 |
| IPI00018288.1 | DNA-directed RNA polymerase II 33 kDa polypeptide                                                 | 2              | 0.870     |           |           | 0.870   |       |
| IPI00027423.2 | Protein phosphatase 1, catalytic subunit, alpha isoform                                           | 2              | 0.870     |           |           | 0.870   |       |
| IPI00219617.4 | Ribose-phosphate pyrophosphokinase II                                                             | 2              | 0.870     |           |           | 0.870   |       |
| IPI00061178.1 | RNA binding motif protein, X-linked-like 1                                                        | 1              | 0.870     |           |           | 0.870   |       |
| IPI00216393.1 | Splice Isoform Non-brain of Clathrin light chain A                                                | 4              | 0.870     |           |           | 0.870   |       |
| IPI00334190.4 | Stomatin-like protein 2                                                                           | 2              | 0.877     | 0.862     |           | 0.870   | 0.011 |

| IPI number        | Protein name                                                       | Peptide number | forward 1 | reverse 2 | reverse 3 | Average | S.D.  |
|-------------------|--------------------------------------------------------------------|----------------|-----------|-----------|-----------|---------|-------|
| IPI00156374.5     | Splice Isoform 1 of Importin-4                                     | 10             |           | 0.932     | 0.812     | 0.872   | 0.085 |
| IPI00640703.3     | Splice Isoform 1 of Exportin-5                                     | 2              | 0.806     | 0.939     |           | 0.873   | 0.093 |
| IPI00180675.4     | Tubulin alpha-3 chain                                              | 3              | 1.136     |           | 0.609     | 0.873   | 0.373 |
| IPI00052885.5     | 18 kDa protein                                                     | 2              | 0.781     | 0.716     | 1.122     | 0.873   | 0.218 |
| IPI00219740.3     | Splice Isoform 2 of DNA replication licensing factor MCM7          | 4              | 0.935     | 0.884     | 0.801     | 0.873   | 0.067 |
| IPI00023647.2     | Hypothetical protein DKFZp451P021                                  | 4              | 1.064     |           | 0.684     | 0.874   | 0.269 |
| IPI00295992.4     | Splice Isoform 2 of ATPase family AAA domain-containing protein 3A | 2              | 0.847     | 0.901     |           | 0.874   | 0.038 |
| IPI00014151.3     | 26S proteasome non-ATPase regulatory subunit 6                     | 2              |           | 0.926     | 0.823     | 0.874   | 0.073 |
| IPI00219616.6     | Ribose-phosphate pyrophosphokinase I                               | 2              | 0.990     |           | 0.759     | 0.874   | 0.164 |
| IPI00030876.4     | Protein diaphanous homolog 1                                       | 6              | 0.943     | 0.978     | 0.705     | 0.876   | 0.149 |
| IPI00420014.2     | U5 small nuclear ribonucleoprotein 200 kDa helicase                | 10             |           | 0.876     |           | 0.876   |       |
| IPI00182757.9     | Splice Isoform 1 of Protein KIAA1967                               | 6              | 1.000     | 0.869     | 0.759     | 0.876   | 0.121 |
| REV_13527_Protein |                                                                    | 2              |           |           | 0.876     | 0.876   |       |
| IPI00027430.1     | Leukosialin precursor                                              | 2              |           |           | 0.876     | 0.876   |       |
| IPI00221178.1     | Splice Isoform 2 of Tumor protein D54                              | 5              | 0.980     | 0.943     | 0.705     | 0.876   | 0.149 |
| IPI00012578.1     | Importin alpha-4 subunit                                           | 4              | 0.909     |           | 0.844     | 0.877   | 0.046 |
| IPI00292894.3     | Hypothetical protein LOC55720                                      | 5              | 0.877     |           |           | 0.877   |       |
| IPI00163505.2     | Splice Isoform 1 of RNA-binding region-containing protein 39       | 3              | 0.877     |           |           | 0.877   |       |
| IPI00219649.3     | Splice Isoform 2 of Cystathionine beta-synthase                    | 2              | 0.877     |           |           | 0.877   |       |
| IPI00329332.1     | Syntaxin-12                                                        | 2              | 0.877     |           |           | 0.877   |       |
| IPI00293126.1     | Tubulin-specific chaperone B                                       | 2              | 0.877     |           |           | 0.877   |       |
| IPI00301058.4     | Vasodilator-stimulated phosphoprotein                              | 5              | 0.877     |           |           | 0.877   |       |
| IPI00216049.1     | Splice Isoform 1 of Heterogeneous nuclear ribonucleoprotein K      | 29             | 0.935     | 0.961     | 0.737     | 0.877   | 0.122 |
| IPI00294536.1     | Serine-threonine kinase receptor-associated protein                | 4              | 0.943     |           | 0.812     | 0.878   | 0.093 |
| IPI00018873.1     | Splice Isoform 1 of Nicotinamide phosphoribosyltransferase         | 2              | 0.901     |           | 0.855     | 0.878   | 0.033 |
| IPI00019927.2     | 26S proteasome non-ATPase regulatory subunit 7                     | 10             | 1.010     | 0.876     | 0.748     | 0.878   | 0.131 |
| IPI00008240.2     | Methionyl-tRNA synthetase                                          | 5              | 1.020     | 0.879     | 0.737     | 0.879   | 0.142 |
| IPI00017334.1     | Prohibitin                                                         | 10             | 0.917     | 0.841     |           | 0.879   | 0.054 |
| IPI00445401.2     | Splice Isoform 2 of HECT, UBA and WWE domain-containing protein 1  | 5              | 1.020     | 1.011     | 0.609     | 0.880   | 0.235 |

| IPI number    | Protein name                                                                                    | Peptide number | forward 1 | reverse 2 | reverse 3 | Average | S.D.  |
|---------------|-------------------------------------------------------------------------------------------------|----------------|-----------|-----------|-----------|---------|-------|
| IPI00220480.7 | 60 kDa protein                                                                                  | 2              | 1.010     | 0.893     | 0.737     | 0.880   | 0.137 |
| IPI00005589.1 | PREDICTED: similar to 60S ribosomal protein L32                                                 | 2              |           | 0.880     |           | 0.880   |       |
| IPI00011937.1 | Peroxiredoxin-4                                                                                 | 3              | 1.031     | 0.830     | 0.780     | 0.880   | 0.133 |
| IPI00007750.1 | Tubulin alpha-1 chain                                                                           | 33             | 0.962     | 0.954     | 0.726     | 0.881   | 0.134 |
| IPI00175108.4 | PREDICTED: similar to heterogeneous nuclear ribonucleoprotein K isoform a isoform 2             | 3              | 0.962     |           | 0.801     | 0.881   | 0.113 |
| IPI00292753.7 | GTPase activating protein and VPS9 domains 1                                                    | 4              | 0.847     | 1.007     | 0.791     | 0.882   | 0.112 |
| IPI00216184.2 | Splice Isoform 2 of Phosphatidylinositol-binding clathrin assembly protein                      | 3              | 0.893     | 0.877     | 0.876     | 0.882   | 0.009 |
| IPI00402104.5 | 15 kDa protein                                                                                  | 2              | 0.699     | 0.996     | 0.951     | 0.882   | 0.160 |
| IPI00105598.3 | Proteasome 26S non-ATPase subunit 11 variant (Fragment)                                         | 8              | 1.010     | 0.890     | 0.748     | 0.883   | 0.131 |
| IPI00215918.2 | ADP-ribosylation factor 4                                                                       | 2              |           | 0.883     |           | 0.883   |       |
| IPI00031570.1 | Probable UPF0334 kinase-like protein C1orf57                                                    | 2              |           | 0.883     |           | 0.883   |       |
| IPI00029079.5 | GMP synthase                                                                                    | 27             | 0.943     | 0.917     | 0.791     | 0.884   | 0.082 |
| IPI00031820.2 | Phenylalanyl-tRNA synthetase alpha chain                                                        | 2              | 0.971     | 0.826     | 0.855     | 0.884   | 0.077 |
| IPI00221354.1 | Splice Isoform Short of RNA-binding protein FUS                                                 | 4              | 0.917     | 0.852     |           | 0.885   | 0.047 |
| IPI00008575.3 | Splice Isoform 1 of KH domain-containing, RNA-binding, signal transduction-associated protein 1 | 6              | 0.893     | 0.877     |           | 0.885   | 0.012 |
| IPI00011569.1 | Acetyl-CoA carboxylase 1                                                                        | 2              |           | 0.885     |           | 0.885   |       |
| IPI00000279.2 | Hypothetical protein LEREPO4                                                                    | 2              | 0.885     |           |           | 0.885   |       |
| IPI00005657.1 | Prefoldin subunit 6                                                                             | 2              |           | 0.885     |           | 0.885   |       |
| IPI00012340.1 | Splicing factor, arginine/serine-rich 9                                                         | 2              |           | 0.885     |           | 0.885   |       |
| IPI00218775.2 | FK506-binding protein 5                                                                         | 2              |           | 1.087     | 0.684     | 0.886   | 0.285 |
| IPI00219217.2 | L-lactate dehydrogenase B chain                                                                 | 2              | 0.917     | 0.898     | 0.844     | 0.886   | 0.038 |
| IPI00030702.1 | Splice Isoform 1 of Isocitrate dehydrogenase [NAD] subunit alpha, mitochondrial precursor       | 4              | 1.031     | 0.972     | 0.662     | 0.888   | 0.198 |
| IPI00005948.1 | Hypothetical protein LOC84245 isoform 1                                                         | 2              | 1.053     | 0.930     | 0.684     | 0.889   | 0.188 |
| IPI00019880.1 | 47 kDa heat shock protein precursor                                                             | 2              | 0.990     | 1.036     | 0.641     | 0.889   | 0.216 |
| IPI00005537.2 | 39S ribosomal protein L12, mitochondrial precursor                                              | 3              | 0.952     | 0.827     |           | 0.890   | 0.089 |
| IPI00007163.1 | U6 snRNA-associated Sm-like protein LSM7                                                        | 4              |           | 0.890     |           | 0.890   |       |
| IPI00011274.1 | Heterogeneous nuclear ribonucleoprotein D-like                                                  | 11             | 0.877     | 0.905     |           | 0.891   | 0.019 |
| IPI00031836.3 | Developmentally-regulated GTP-binding protein 1                                                 | 3              | 0.901     | 0.881     |           | 0.891   | 0.014 |

| IPI number    | Protein name                                                                  | Peptide number | forward 1 | reverse 2 | reverse 3 | Average | S.D.  |
|---------------|-------------------------------------------------------------------------------|----------------|-----------|-----------|-----------|---------|-------|
| IPI00010204.1 | Splicing factor, arginine/serine-rich 3                                       | 2              | 0.952     | 0.830     |           | 0.891   | 0.086 |
| IPI00290461.3 | Eukaryotic translation initiation factor 3 subunit 1                          | 3              |           | 0.811     | 0.972     | 0.891   | 0.114 |
| IPI00027397.3 | Splice Isoform 1 of Hematological and neurological expressed 1-like protein   | 4              |           | 0.893     |           | 0.893   |       |
| IPI00299000.4 | Proliferation-associated protein 2G4                                          | 9              | 0.893     | 0.889     | 0.897     | 0.893   | 0.004 |
| IPI00374686.3 | PREDICTED: similar to heterogeneous nuclear ribonucleoprotein A3 isoform 1    | 4              |           | 0.894     |           | 0.894   |       |
| IPI00289535.6 | Mitochondrial-processing peptidase beta subunit, mitochondrial precursor      | 2              | 1.163     | 0.813     | 0.705     | 0.894   | 0.239 |
| IPI00018465.1 | T-complex protein 1 subunit eta                                               | 8              | 0.909     | 0.886     | 0.887     | 0.894   | 0.013 |
| IPI00549248.3 | Nucleophosmin                                                                 | 3              |           | 0.894     |           | 0.894   |       |
| IPI00219330.2 | Splice Isoform 5 of Interleukin enhancer-binding factor 3                     | 2              | 1.099     | 0.963     | 0.620     | 0.894   | 0.247 |
| IPI00219525.9 | 6-phosphogluconate dehydrogenase, decarboxylating                             | 5              | 1.053     | 0.968     | 0.662     | 0.894   | 0.205 |
| IPI00029764.1 | Splicing factor 3A subunit 3                                                  | 2              | 0.971     | 0.794     | 0.919     | 0.895   | 0.091 |
| IPI00301434.4 | BolA-like protein 2 isoform a                                                 | 3              |           | 0.817     | 0.972     | 0.895   | 0.109 |
| IPI00013146.1 | Mitochondrial 28S ribosomal protein S22                                       | 3              | 0.935     | 0.855     |           | 0.895   | 0.056 |
| IPI00243220.2 | 132 kDa protein                                                               | 3              | 1.000     | 0.970     | 0.716     | 0.895   | 0.156 |
| IPI00011284.1 | Catechol O-methyltransferase                                                  | 3              | 0.943     | 0.932     | 0.812     | 0.896   | 0.073 |
| IPI00033130.3 | Ubiquitin-like 1-activating enzyme E1A                                        | 6              | 1.053     | 0.869     | 0.769     | 0.897   | 0.144 |
| IPI00006510.1 | Tubulin beta-1 chain                                                          | 5              | 0.893     | 0.934     | 0.865     | 0.897   | 0.034 |
| IPI00027448.3 | ATP synthase subunit g, mitochondrial                                         | 2              | 0.909     | 0.886     |           | 0.898   | 0.016 |
| IPI00026964.1 | Ubiquinol-cytochrome c reductase iron-sulfur subunit, mitochondrial precursor | 2              |           | 0.795     | 1.000     | 0.898   | 0.145 |
| IPI00176698.2 | 12 kDa protein                                                                | 7              | 1.087     | 0.923     | 0.684     | 0.898   | 0.203 |
| IPI00026689.4 | Hypothetical protein DKFZp686L20222                                           | 3              | 0.877     | 1.091     | 0.726     | 0.898   | 0.183 |
| IPI00024664.1 | Splice Isoform Long of Ubiquitin carboxyl-terminal hydrolase 5                | 2              | 1.053     | 1.012     | 0.630     | 0.898   | 0.233 |
| IPI00032460.3 | U6 snRNA-associated Sm-like protein LSm2                                      | 4              | 0.971     | 0.827     |           | 0.899   | 0.102 |
| IPI00007927.3 | Splice Isoform 1 of Structural maintenance of chromosome 2-like 1 protein     | 1              | 1.053     | 0.746     |           | 0.899   | 0.217 |
| IPI00021016.3 | Splice Isoform 1 of Elongation factor Ts, mitochondrial precursor             | 2              | 0.893     |           | 0.908     | 0.900   | 0.011 |
| IPI00029485.2 | Splice Isoform p150 of Dynactin-1                                             | 7              | 1.064     |           | 0.737     | 0.901   | 0.231 |
| IPI00009253.1 | Alpha-soluble NSF attachment protein                                          | 5              | 1.000     |           | 0.801     | 0.901   | 0.141 |

| IPI number    | Protein name                                                                               | Peptide number | forward 1 | reverse 2 | reverse 3 | Average | S.D.  |
|---------------|--------------------------------------------------------------------------------------------|----------------|-----------|-----------|-----------|---------|-------|
| IPI00021926.2 | 26S protease regulatory subunit S10B                                                       | 6              | 1.031     | 0.927     | 0.748     | 0.902   | 0.143 |
| IPI00013894.1 | Stress-induced-phosphoprotein 1                                                            | 17             | 0.926     | 0.925     | 0.855     | 0.902   | 0.041 |
| IPI00549861.2 | CDNA FLJ13369 fis, clone PLACE1000610, weakly similar to MSN5 PROTEIN                      | 3              | 0.935     | 0.869     |           | 0.902   | 0.046 |
| IPI00002520.1 | Serine hydroxymethyltransferase, mitochondrial precursor                                   | 3              | 1.053     | 0.704     | 0.951     | 0.903   | 0.179 |
| IPI00465260.3 | GARS protein                                                                               | 11             | 1.099     | 0.938     | 0.673     | 0.903   | 0.215 |
| IPI00218847.4 | Splice Isoform 2 of Low molecular weight phosphotyrosine protein phosphatase               |                |           | 1.027     | 0.780     | 0.904   | 0.175 |
| IPI00016339.4 | Ras-related protein Rab-5C                                                                 | 12             | 0.862     | 0.856     | 0.994     | 0.904   | 0.078 |
| IPI00009305.1 | Glucosamine-6-phosphate isomerase                                                          | 2              |           | 0.847     | 0.962     | 0.904   | 0.081 |
| IPI00003881.5 | Heterogeneous nuclear ribonucleoprotein F                                                  | 3              | 0.826     | 1.033     | 0.855     | 0.905   | 0.112 |
| IPI00021700.3 | Proliferating cell nuclear antigen                                                         | 5              | 0.971     | 0.987     | 0.759     | 0.905   | 0.127 |
| IPI00013877.2 | Splice Isoform 1 of Heterogeneous nuclear ribonucleoprotein H3                             | 4              | 1.020     | 0.791     |           | 0.906   | 0.162 |
| IPI00005705.1 | Splice Isoform Gamma-1 of Serine/threonine-protein phosphatase PP1-gamma catalytic subunit | 4              | 1.010     |           | 0.801     | 0.906   | 0.148 |
| IPI00007812.1 | Vacuolar ATP synthase subunit B, brain isoform                                             | 2              | 1.000     | 1.012     | 0.705     | 0.906   | 0.174 |
| IPI00026670.3 | Transcription elongation factor B polypeptide 2                                            | 1              |           | 0.906     |           | 0.906   |       |
| IPI00014898.1 | Splice Isoform 1 of Plectin-1                                                              | 2              | 1.010     | 0.803     |           | 0.906   | 0.147 |
| IPI00020984.1 | Calnexin precursor                                                                         | 4              | 0.962     | 0.861     | 0.897     | 0.907   | 0.051 |
| IPI00026154.1 | Glucosidase 2 beta subunit precursor                                                       | 2              | 0.917     | 0.820     | 0.983     | 0.907   | 0.082 |
| IPI00185374.3 | 26S proteasome non-ATPase regulatory subunit 12                                            | 4              | 0.990     | 0.898     | 0.833     | 0.907   | 0.079 |
| IPI00029744.1 | Single-stranded DNA-binding protein, mitochondrial precursor                               | 13             | 1.136     | 1.009     | 0.577     | 0.907   | 0.293 |
| IPI00003949.1 | Ubiquitin-conjugating enzyme E2 N                                                          | 5              | 0.935     | 0.850     | 0.940     | 0.908   | 0.051 |
| IPI00006612.1 | Clathrin coat assembly protein AP180                                                       | 2              |           |           | 0.908     | 0.908   |       |
| IPI00000060.1 | Guanine nucleotide-binding protein G(I)/G(S)/G(O) gamma-5-like subunit                     | 2              |           |           | 0.908     | 0.908   |       |
| IPI00027230.3 | Endoplasmic precursor                                                                      | 23             | 0.962     | 0.866     | 0.897     | 0.908   | 0.049 |
| IPI00017303.1 | DNA mismatch repair protein Msh2                                                           | 2              |           | 1.124     | 0.694     | 0.909   | 0.303 |
| IPI00024524.3 | Putative 28 kDa protein                                                                    | 2              | 0.909     |           |           | 0.909   |       |
| IPI00215888.3 | Signal recognition particle 72 kDa protein                                                 | 1              | 0.909     |           |           | 0.909   |       |
| IPI00290305.3 | TP53-regulating kinase                                                                     | 2              | 0.909     |           |           | 0.909   |       |
| IPI00001890.8 | Coatomer subunit gamma                                                                     | 2              | 1.053     | 0.713     | 0.962     | 0.909   | 0.176 |

| IPI number       | Protein name                                                            | Peptide number | forward 1 | reverse 2 | reverse 3 | Average | S.D.  |
|------------------|-------------------------------------------------------------------------|----------------|-----------|-----------|-----------|---------|-------|
| IPI00456750.2    | Niban-like protein                                                      | 2              | 0.826     |           | 0.994     | 0.910   | 0.118 |
| IPI00643041.2    | GTP-binding nuclear protein Ran                                         | 2              | 1.075     | 0.832     | 0.823     | 0.910   | 0.143 |
| IPI00007765.5    | Stress-70 protein, mitochondrial precursor                              | 49             | 0.926     | 0.907     | 0.897     | 0.910   | 0.015 |
| IPI00376503.1    | Pyrroline-5-carboxylate reductase 1 isoform 2                           | 8              | 0.990     |           | 0.833     | 0.912   | 0.111 |
| IPI00029740.1    | Sorting nexin 3 isoform a                                               | 3              |           | 0.912     |           | 0.912   |       |
| IPI00396321.1    | Leucine-rich repeat-containing protein 59                               | 6              | 0.862     | 0.916     | 0.962     | 0.913   | 0.050 |
| IPI00010201.4    | 26S proteasome non-ATPase regulatory subunit 8                          | 2              | 0.952     |           | 0.876     | 0.914   | 0.054 |
| IPI00012074.3    | Heterogeneous nuclear ribonucleoprotein R                               | 10             | 1.010     | 0.879     | 0.855     | 0.915   | 0.083 |
| IPI00003377.1    | Splice Isoform 1 of Splicing factor, arginine/serine-rich 7             | 8              | 0.962     | 0.869     |           | 0.915   | 0.066 |
| IPI00000877.1    | 150 kDa oxygen-regulated protein precursor                              | 2              | 1.031     | 0.926     | 0.791     | 0.916   | 0.120 |
| IPI00000874.1    | Peroxiredoxin-1                                                         | 3              | 1.075     | 0.765     | 0.908     | 0.916   | 0.155 |
| IPI00554777.1    | Asparagine synthetase                                                   | 2              | 1.000     | 0.787     | 0.962     | 0.916   | 0.113 |
| IPI00013949.1    | Small glutamine-rich tetratricopeptide repeat-containing protein A      | 3              | 0.893     |           | 0.940     | 0.917   | 0.033 |
| IPI00022694.3    | Splice Isoform Rpn10A of 26S proteasome non-ATPase regulatory subunit 4 | 6              | 1.000     |           | 0.833     | 0.917   | 0.118 |
| IPI00026268.2    | Guanine nucleotide-binding protein G(I)/G(S)/G(T) beta s                | 4              | 0.990     |           | 0.844     | 0.917   | 0.103 |
| IPI00465315.5    | Cytochrome c                                                            | 2              | 1.087     | 0.939     | 0.726     | 0.917   | 0.181 |
| IPI00219335.9    | 60S ribosomal protein L3-like                                           | 2              | 0.917     |           |           | 0.917   |       |
| IPI00025277.5    | Programmed cell death protein 6                                         | 1              | 0.917     |           |           | 0.917   |       |
| IPI00000948.3    | Transducin beta-like 2 protein                                          | 2              | 0.917     |           |           | 0.917   |       |
| IPI00018398.4    | 26S protease regulatory subunit 6A                                      | 4              | 1.020     | 0.974     | 0.759     | 0.918   | 0.140 |
| IPI00016768.2    | L-lactate dehydrogenase A-like 6B                                       | 1              |           |           | 0.919     | 0.919   |       |
| IPI00219077.3    | LTA4H protein                                                           | 2              |           |           | 0.919     | 0.919   |       |
| IPI00020008.1    | NEDD8 precursor                                                         | 2              |           |           | 0.919     | 0.919   |       |
| REV_1501_Protein | no description                                                          | 1              |           |           | 0.919     | 0.919   |       |
| IPI00465439.4    | Fructose-bisphosphate aldolase A                                        | 7              | 1.000     | 0.987     | 0.769     | 0.919   | 0.130 |
| IPI00220642.6    | 14-3-3 protein gamma                                                    | 11             | 0.971     | 0.953     | 0.833     | 0.919   | 0.075 |
| IPI00291946.7    | Ubiquitin carboxyl-terminal hydrolase 10                                | 2              | 0.926     | 1.266     | 0.566     | 0.919   | 0.350 |
| IPI00003362.2    | Hypothetical protein                                                    | 37             | 1.042     | 0.798     | 0.919     | 0.919   | 0.122 |
| IPI00294627.1    | Splice Isoform 2 of Splicing factor 1                                   | 2              | 1.099     | 0.965     | 0.694     | 0.919   | 0.206 |
| IPI00024620.5    | E(Y)2 homolog                                                           | 2              | 0.840     | 0.999     |           | 0.920   | 0.112 |



| IPI number    | Protein name                                                                         | Peptide number | forward 1 | reverse 2 | reverse 3 | Average | S.D.  |
|---------------|--------------------------------------------------------------------------------------|----------------|-----------|-----------|-----------|---------|-------|
| IPI00375380.3 | proteasome 26S non-ATPase subunit 13 isoform 2                                       | 3              | 1.010     | 0.941     | 0.812     | 0.921   | 0.101 |
| IPI00028888.1 | Splice Isoform 1 of Heterogeneous nuclear ribonucleoprotein D0                       | 2              | 1.087     | 0.961     | 0.716     | 0.921   | 0.189 |
| IPI00301277.1 | Heat shock 70 kDa protein 1L                                                         | 7              | 1.075     | 0.941     | 0.748     | 0.921   | 0.165 |
| IPI00438229.1 | Splice Isoform 1 of Transcription intermediary factor 1-beta                         | 8              | 0.971     | 0.982     | 0.812     | 0.921   | 0.095 |
| IPI00300371.3 | Splicing factor 3B subunit 3                                                         | 2              |           | 0.957     | 0.887     | 0.922   | 0.050 |
| IPI00007755.2 | Ras-related protein Rab-21                                                           | 5              | 0.943     | 0.967     | 0.855     | 0.922   | 0.059 |
| IPI00011134.1 | Heat shock 70 kDa protein 7 (Fragment)                                               | 2              | 1.111     | 0.917     | 0.737     | 0.922   | 0.187 |
| IPI00021290.4 | ATP-citrate synthase                                                                 | 27             | 1.010     | 0.934     | 0.823     | 0.922   | 0.094 |
| IPI00383751.1 | CALRETICULIN (Calcium binding protein)                                               | 2              | 1.031     | 0.989     | 0.748     | 0.923   | 0.153 |
| IPI00550882.2 | Pyrroline-5-carboxylate reductase 1                                                  | 1              | 0.980     | 1.008     | 0.780     | 0.923   | 0.125 |
| IPI00027285.1 | Splice Isoform SM-B' of Small nuclear ribonucleoprotein-associated proteins B and B' | 3              |           | 0.852     | 0.994     | 0.923   | 0.100 |
| IPI00006167.1 | Protein phosphatase 2C isoform gamma                                                 | 3              | 1.075     | 0.862     | 0.833     | 0.923   | 0.132 |
| IPI00010796.1 | Protein disulfide-isomerase precursor                                                | 6              | 0.935     | 0.919     | 0.919     | 0.924   | 0.009 |
| IPI00031697.1 | Transmembrane protein 109 precursor                                                  | 3              |           | 0.924     |           | 0.924   |       |
| IPI00220644.7 | Splice Isoform M1 of Pyruvate kinase isozymes M1/M2                                  | 26             | 0.909     | 0.914     | 0.951     | 0.925   | 0.023 |
| IPI00646917.1 | Cleavage and polyadenylation specificity factor 5                                    | 2              | 0.980     | 0.870     |           | 0.925   | 0.078 |
| IPI00023640.2 | Programmed cell death protein 5                                                      | 15             | 1.149     | 0.741     | 0.887     | 0.926   | 0.207 |
| IPI00293350.3 | Translin-associated protein X                                                        | 2              | 0.901     |           | 0.951     | 0.926   | 0.035 |
| IPI00069750.1 | Fuse-binding protein-interacting repressor isoform a                                 | 3              | 0.877     | 0.939     | 0.962     | 0.926   | 0.044 |
| IPI00004454.2 | Dolichyl-phosphate mannosyltransferase polypeptide 3 isoform 1                       | 2              |           | 0.926     |           | 0.926   |       |
| IPI00031556.5 | Splicing factor U2AF 65 kDa subunit                                                  | 5              | 0.926     |           |           | 0.926   |       |
| IPI00554786.2 | Thioredoxin reductase 1, cytoplasmic precursor                                       | 2              | 0.971     | 0.835     | 0.972     | 0.926   | 0.079 |
| IPI00003479.2 | Mitogen-activated protein kinase 1                                                   | 10             | 0.971     | 1.092     | 0.716     | 0.926   | 0.192 |
| IPI00012007.5 | Adenosylhomocysteinase                                                               | 9              | 0.893     | 0.818     | 1.068     | 0.927   | 0.128 |
| IPI00027255.1 | Myosin light chain 1, slow-twitch muscle A isoform                                   | 2              |           | 0.927     |           | 0.927   |       |
| IPI00293434.1 | Signal recognition particle 14 kDa protein                                           | 6              | 0.806     | 1.047     |           | 0.927   | 0.170 |
| IPI00005978.7 | Splicing factor, arginine/serine-rich 2                                              | 4              | 1.020     | 0.833     |           | 0.927   | 0.132 |
| IPI00009904.1 | Protein disulfide-isomerase A4 precursor                                             | 11             | 1.010     | 0.918     | 0.855     | 0.928   | 0.078 |
| IPI00382412.3 | Branched-chain-amino-acid aminotransferase, cytosolic                                | 4              | 0.990     |           | 0.865     | 0.928   | 0.088 |
| IPI00216171.2 | Gamma-enolase                                                                        | 7              | 0.962     | 0.882     | 0.940     | 0.928   | 0.041 |

| IPI number    | Protein name                                                              | Peptide number | forward 1 | reverse 2 | reverse 3 | Average | S.D.  |
|---------------|---------------------------------------------------------------------------|----------------|-----------|-----------|-----------|---------|-------|
| IPI00001639.2 | Importin beta-1 subunit                                                   | 15             | 0.935     | 0.890     | 0.962     | 0.929   | 0.036 |
| IPI00177728.3 | Cytosolic nonspecific dipeptidase                                         | 3              |           |           | 0.929     | 0.929   |       |
| IPI00002803.5 | Serine/threonine-protein kinase N1                                        | 3              |           |           | 0.929     | 0.929   |       |
| IPI00010460.1 | AH receptor-interacting protein                                           | 2              |           | 0.833     | 1.026     | 0.929   | 0.136 |
| IPI00383581.3 | Splice Isoform 1 of Neutral alpha-glucosidase AB precursor                | 2              | 0.952     |           | 0.908     | 0.930   | 0.031 |
| IPI00166768.2 | TUBA6 protein                                                             | 2              | 0.990     | 0.957     | 0.844     | 0.930   | 0.077 |
| IPI00179291.4 | Cytosolic aminopeptidase P                                                | 2              |           | 0.696     | 1.165     | 0.930   | 0.331 |
| IPI00218371.3 | Ribose-phosphate pyrophosphokinase III                                    | 3              | 1.000     | 0.885     | 0.908     | 0.931   | 0.061 |
| IPI00220038.1 | Splice Isoform B of Arsenite-resistance protein 2                         | 2              | 0.943     | 0.920     |           | 0.932   | 0.016 |
| IPI00020042.2 | Splice Isoform 1 of 26S protease regulatory subunit 6B                    | 8              | 1.075     | 0.996     | 0.726     | 0.933   | 0.183 |
| IPI00031461.1 | Rab GDP dissociation inhibitor beta                                       | 8              | 1.010     | 0.806     | 0.983     | 0.933   | 0.111 |
| IPI00180637.4 | TIP41, TOR signalling pathway regulator-like isoform 1                    | 2              | 0.840     |           | 1.026     | 0.933   | 0.131 |
| IPI00294178.1 | Serine/threonine-protein phosphatase 2A 65 kDa regulator                  | 5              | 0.990     |           | 0.876     | 0.933   | 0.081 |
| IPI00027434.1 | Rho-related GTP-binding protein RhoC precursor                            | 5              | 0.820     | 0.954     | 1.026     | 0.933   | 0.105 |
| IPI00017964.1 | Small nuclear ribonucleoprotein Sm D3                                     | 6              |           | 0.916     | 0.951     | 0.933   | 0.025 |
| IPI00007752.1 | Tubulin beta-2C chain                                                     | 2              | 0.971     | 1.009     | 0.823     | 0.934   | 0.098 |
| IPI00220637.4 | Seryl-tRNA synthetase                                                     | 20             | 0.971     |           | 0.897     | 0.934   | 0.052 |
| IPI00008527.3 | 60S acidic ribosomal protein P1                                           | 2              | 0.758     |           | 1.111     | 0.934   | 0.250 |
| IPI00024968.1 | BM022                                                                     | 3              | 0.935     |           |           | 0.935   |       |
| IPI00219483.1 | Splice Isoform 2 of U1 small nuclear ribonucleoprotein 70 kDa             | 2              |           | 0.935     |           | 0.935   |       |
| IPI00305442.3 | Ubiquitin associated domain containing 1                                  | 3              | 0.935     |           |           | 0.935   |       |
| IPI00032003.1 | Emerin                                                                    | 2              | 0.926     | 0.943     |           | 0.935   | 0.012 |
| IPI00011675.1 | Splice Isoform Sp100-HMG of Nuclear autoantigen Sp-100                    | 2              | 1.176     |           | 0.694     | 0.935   | 0.341 |
| IPI00220991.2 | Splice Isoform 2 of AP-2 complex subunit beta-1                           | 2              | 1.020     | 0.943     | 0.844     | 0.936   | 0.088 |
| IPI00215638.5 | ATP-dependent RNA helicase A                                              | 20             | 1.020     | 0.912     | 0.876     | 0.936   | 0.075 |
| IPI00250297.3 | L-aminoadipate-semialdehyde dehydrogenase-phosphopantetheinyl transferase | 3              | 0.943     |           | 0.929     | 0.936   | 0.010 |
| IPI00140420.4 | Staphylococcal nuclease domain-containing protein 1                       | 15             | 0.901     | 0.915     | 0.994     | 0.936   | 0.050 |
| IPI00013890.1 | 14-3-3 protein sigma                                                      | 2              |           | 0.937     |           | 0.937   |       |
| IPI00028055.4 | Transmembrane emp24 domain-containing protein 10 precursor                | 2              |           | 0.937     |           | 0.937   |       |
| IPI00011454.1 | Splice Isoform 2 of Neutral alpha-glucosidase AB precursor                | 3              | 0.962     | 0.951     | 0.897     | 0.937   | 0.034 |

| IPI number    | Protein name                                                           | Peptide number | forward 1 | reverse 2 | reverse 3 | Average | S.D.  |
|---------------|------------------------------------------------------------------------|----------------|-----------|-----------|-----------|---------|-------|
| IPI00021435.2 | 26S protease regulatory subunit 7                                      | 2              | 0.980     | 1.028     | 0.801     | 0.937   | 0.120 |
| IPI00007188.4 | ADP/ATP translocase 2                                                  | 9              | 0.909     | 0.965     |           | 0.937   | 0.039 |
| IPI00018768.1 | Translin                                                               | 3              | 0.935     | 0.831     | 1.047     | 0.937   | 0.108 |
| IPI00025796.3 | NADH-ubiquinone oxidoreductase 30 kDa subunit, mitochondrial precursor | 2              | 1.042     | 0.833     |           | 0.938   | 0.147 |
| IPI00013871.1 | Ribonucleoside-diphosphate reductase large subunit                     | 2              | 0.935     | 1.056     | 0.823     | 0.938   | 0.117 |
| IPI00013808.1 | Alpha-actinin-4                                                        | 8              | 0.901     | 0.929     | 0.983     | 0.938   | 0.042 |
| IPI00011654.2 | Tubulin beta-2 chain                                                   | 15             | 0.952     | 0.943     | 0.919     | 0.938   | 0.017 |
| IPI00027834.3 | Heterogeneous nuclear ribonucleoprotein L isoform a                    | 5              | 1.111     | 1.056     | 0.652     | 0.940   | 0.251 |
| IPI00465256.3 | GTP:AMP phosphotransferase mitochondrial                               | 4              |           |           | 0.940     | 0.940   |       |
| IPI00024644.5 | Phosphoribosyl transferase domain containing 1 variant                 | 2              |           |           | 0.940     | 0.940   |       |
| IPI00334159.6 | Von Hippel-Lindau binding protein 1                                    | 2              | 0.855     |           | 1.026     | 0.940   | 0.121 |
| IPI00023919.4 | 26S protease regulatory subunit 8                                      | 3              | 0.885     | 1.146     | 0.791     | 0.940   | 0.184 |
| IPI00289334.1 | Splice Isoform 1 of Filamin-B                                          | 11             | 0.926     | 1.074     | 0.823     | 0.941   | 0.126 |
| IPI00220301.4 | Peroxiredoxin-6                                                        | 38             | 1.064     | 1.011     | 0.748     | 0.941   | 0.169 |
| IPI00295400.1 | Tryptophanyl-tRNA synthetase                                           | 5              | 0.990     | 0.918     | 0.919     | 0.942   | 0.041 |
| IPI00013769.1 | Alpha-enolase, lung specific                                           | 10             | 0.980     | 0.865     | 0.983     | 0.943   | 0.067 |
| IPI00143753.3 | PREDICTED: U2-associated SR140 protein                                 | 3              | 0.893     | 0.993     |           | 0.943   | 0.071 |
| IPI00003734.1 | Putative S100 calcium-binding protein H_NH0456N16.1                    | 3              | 0.926     | 0.960     |           | 0.943   | 0.024 |
| IPI00096066.2 | Succinyl-CoA ligase [GDP-forming] beta-chain, mitochondrial            | 4              | 1.064     |           | 0.823     | 0.943   | 0.171 |
| IPI00004968.1 | Pre-mRNA-splicing factor 19                                            | 4              | 1.042     | 0.845     |           | 0.943   | 0.139 |
| IPI00009480.1 | COP9 signalosome complex subunit 8                                     | 2              |           | 0.943     |           | 0.943   |       |
| IPI00291165.6 | Polyribonucleotide nucleotidyltransferase 1, mitochondrial             | 4              | 0.943     |           |           | 0.943   |       |
| IPI00640981.2 | Retinoblastoma-associated factor 600                                   | 2              |           | 0.943     |           | 0.943   |       |
| IPI00009235.1 | Translocon-associated protein gamma subunit                            | 2              |           | 0.943     |           | 0.943   |       |
| IPI00180954.4 | Cold-inducible RNA-binding protein                                     | 4              |           | 0.944     |           | 0.944   |       |
| IPI00010105.1 | Eukaryotic translation initiation factor 6                             | 5              | 1.149     | 0.807     | 0.876     | 0.944   | 0.181 |
| IPI00027107.5 | Tu translation elongation factor, mitochondrial                        | 25             | 1.042     | 0.959     | 0.833     | 0.945   | 0.105 |
| IPI00178352.4 | Splice Isoform 1 of Filamin-C                                          | 31             | 1.010     | 1.034     | 0.791     | 0.945   | 0.134 |
| IPI00219018.6 | Glyceraldehyde-3-phosphate dehydrogenase                               | 40             | 0.917     | 0.808     | 1.111     | 0.945   | 0.154 |
| IPI00013679.1 | Splice Isoform DUT-M of Deoxyuridine 5'-triphosphate                   | 8              | 1.220     | 0.733     | 0.887     | 0.947   | 0.248 |

| IPI number    | Protein name                                                                                                                  | Peptide number | forward 1 | reverse 2 | reverse 3 | Average | S.D.  |
|---------------|-------------------------------------------------------------------------------------------------------------------------------|----------------|-----------|-----------|-----------|---------|-------|
|               | nucleotidohydrolase, mitochondrial precursor                                                                                  |                |           |           |           |         |       |
| IPI00172460.3 | Splice Isoform 3 of Adenylate kinase isoenzyme 2, mitochondrial                                                               | 14             | 1.064     | 0.815     | 0.962     | 0.947   | 0.125 |
| IPI00216105.1 | Splice Isoform 2 of Putative GTP-binding protein PTD004                                                                       | 3              | 0.980     | 1.049     | 0.812     | 0.947   | 0.122 |
| IPI00246058.5 | PDCD6IP protein                                                                                                               | 8              | 1.020     | 1.062     | 0.759     | 0.947   | 0.165 |
| IPI00221222.6 | Activated RNA polymerase II transcriptional coactivator p15                                                                   | 3              | 0.990     | 0.890     | 0.962     | 0.947   | 0.052 |
| IPI00025366.4 | Citrate synthase, mitochondrial precursor                                                                                     | 8              | 1.075     | 1.031     | 0.737     | 0.948   | 0.184 |
| IPI00013174.2 | Splice Isoform 1 of RNA-binding protein 14                                                                                    | 2              |           | 0.948     |           | 0.948   |       |
| IPI00298558.2 | Programmed cell death protein 10                                                                                              | 2              | 1.042     | 1.163     | 0.641     | 0.948   | 0.273 |
| IPI00401264.5 | Thioredoxin domain-containing protein 4 precursor                                                                             | 5              | 1.149     |           | 0.748     | 0.949   | 0.284 |
| IPI00294398.1 | Splice Isoform 1 of Short chain 3-hydroxyacyl-CoA dehydrogenase, mitochondrial precursor                                      | 2              | 0.962     | 1.190     | 0.694     | 0.949   | 0.248 |
| IPI00024661.4 | Protein transport protein Sec24C                                                                                              | 2              | 0.990     |           | 0.908     | 0.949   | 0.058 |
| IPI00411706.1 | Esterase D                                                                                                                    | 1              | 1.010     | 0.997     | 0.844     | 0.950   | 0.092 |
| IPI00453476.2 | PREDICTED: similar to Phosphoglycerate mutase 1 (Phosphoglycerate mutase isozyme B) (PGAM-B) (BPG-dependent PGAM 1) isoform 1 | 16             | 1.000     | 0.911     | 0.940     | 0.950   | 0.045 |
| IPI00004416.1 | Charged multivesicular body protein 2a                                                                                        | 7              |           |           | 0.951     | 0.951   |       |
| IPI00299904.3 | Splice Isoform 1 of DNA replication licensing factor MCM7                                                                     | 5              | 0.943     | 0.958     |           | 0.951   | 0.011 |
| IPI00219622.2 | Proteasome subunit alpha type 2                                                                                               | 1              | 0.926     | 0.957     | 0.972     | 0.952   | 0.024 |
| IPI00304925.3 | Heat shock 70 kDa protein 1                                                                                                   | 15             | 1.053     | 0.937     | 0.865     | 0.952   | 0.094 |
| IPI00220362.4 | 10 kDa heat shock protein, mitochondrial                                                                                      | 14             | 1.042     | 0.831     | 0.983     | 0.952   | 0.109 |
| IPI00033030.2 | Adhesion-regulating molecule 1 precursor                                                                                      | 2              | 1.042     | 0.862     |           | 0.952   | 0.127 |
| IPI00293655.3 | ATP-dependent RNA helicase DDX1                                                                                               | 11             | 0.952     |           |           | 0.952   |       |
| IPI00009949.1 | Proteasome inhibitor PI31 subunit                                                                                             | 2              |           | 0.952     |           | 0.952   |       |
| IPI00005613.2 | Splicing factor U2AF 35 kDa subunit                                                                                           | 2              | 0.952     |           |           | 0.952   |       |
| IPI00044779.1 | TC4 protein                                                                                                                   | 7              | 0.971     | 0.904     | 0.983     | 0.952   | 0.043 |
| IPI00291922.2 | Proteasome subunit alpha type 5                                                                                               | 8              | 1.075     | 0.908     | 0.876     | 0.953   | 0.107 |
| IPI00215790.5 | 60S ribosomal protein L38                                                                                                     | 5              | 1.124     | 0.782     |           | 0.953   | 0.241 |
| IPI00016342.1 | Ras-related protein Rab-7                                                                                                     | 10             | 0.909     | 1.002     | 0.951     | 0.954   | 0.047 |
| IPI00024911.1 | Endoplasmic reticulum protein ERp29 precursor                                                                                 | 5              | 1.053     | 0.958     | 0.855     | 0.955   | 0.099 |
| IPI00005198.2 | Interleukin enhancer-binding factor 2                                                                                         | 5              | 1.136     | 0.779     | 0.951     | 0.955   | 0.179 |

| IPI number    | Protein name                                                                                                                                                                                                                                      | Peptide number | forward 1 | reverse 2 | reverse 3 | Average | S.D.  |
|---------------|---------------------------------------------------------------------------------------------------------------------------------------------------------------------------------------------------------------------------------------------------|----------------|-----------|-----------|-----------|---------|-------|
| IPI00005102.3 | Spermine synthase                                                                                                                                                                                                                                 | 3              | 0.962     |           | 0.951     | 0.956   | 0.008 |
| IPI00217661.3 | Splice Isoform 2 of Protein raver-1                                                                                                                                                                                                               | 3              |           | 0.957     |           | 0.957   |       |
| IPI00412259.2 | PREDICTED: similar to ATP-dependent DNA helicase II, 70 kDa subunit (Lupus Ku autoantigen protein p70) (Ku70) (70 kDa subunit of Ku antigen) (Thyroid-lupus autoantigen) (TLAA) (CTC box binding factor 75 kDa subunit) (CTCBF) (CTC75) isoform 1 | 6              | 1.064     | 0.974     | 0.833     | 0.957   | 0.116 |
| IPI00032831.4 | Synaptosomal-associated protein 29                                                                                                                                                                                                                | 4              | 0.990     | 1.020     | 0.865     | 0.958   | 0.082 |
| IPI00023004.6 | Eukaryotic translation initiation factor 1A, Y-chromosomal                                                                                                                                                                                        | 2              |           | 0.959     |           | 0.959   |       |
| IPI00032892.1 | Geranylgeranyl pyrophosphate synthetase                                                                                                                                                                                                           | 4              | 1.064     |           | 0.855     | 0.959   | 0.148 |
| IPI00023542.5 | Transmembrane emp24 protein transport domain containing 9                                                                                                                                                                                         | 2              |           | 0.960     |           | 0.960   |       |
| IPI00003527.4 | Ezrin-radixin-moesin-binding phosphoprotein 50                                                                                                                                                                                                    | 1              |           |           | 0.962     | 0.962   |       |
| IPI00555915.1 | Heat shock protein 90Bf                                                                                                                                                                                                                           | 1              | 0.962     |           |           | 0.962   |       |
| IPI00217053.6 | Hypothetical protein                                                                                                                                                                                                                              | 2              |           |           | 0.962     | 0.962   |       |
| IPI00155168.2 | Protein tyrosine phosphatase, receptor type, C                                                                                                                                                                                                    | 2              |           |           | 0.962     | 0.962   |       |
| IPI00165261.5 | Sec1 family domain-containing protein 1                                                                                                                                                                                                           | 2              |           |           | 0.962     | 0.962   |       |
| IPI00008167.1 | Sodium/potassium-transporting ATPase beta-3 chain                                                                                                                                                                                                 | 5              |           |           | 0.962     | 0.962   |       |
| IPI00170796.1 | Splice Isoform 1 of Vacuolar protein sorting 29                                                                                                                                                                                                   | 2              |           | 0.962     |           | 0.962   |       |
| IPI00256684.1 | Splice Isoform B of AP-2 complex subunit alpha-1                                                                                                                                                                                                  | 3              | 0.962     |           |           | 0.962   |       |
| IPI00029601.4 | Src substrate cortactin                                                                                                                                                                                                                           | 1              | 0.962     |           |           | 0.962   |       |
| IPI00004324.1 | Trafficking protein particle complex subunit 3                                                                                                                                                                                                    | 2              |           | 0.962     |           | 0.962   |       |
| IPI00305383.1 | Ubiquinol-cytochrome-c reductase complex core protein 2,                                                                                                                                                                                          | 8              | 0.962     |           |           | 0.962   |       |
| IPI00553131.2 | UDP-glucose 4-epimerase                                                                                                                                                                                                                           | 3              | 0.962     |           |           | 0.962   |       |
| IPI00009268.1 | Aminoacylase-1                                                                                                                                                                                                                                    | 2              | 0.952     | 0.962     | 0.972     | 0.962   | 0.010 |
| IPI00465430.5 | 70 kDa protein                                                                                                                                                                                                                                    | 9              | 1.010     | 1.033     | 0.844     | 0.962   | 0.103 |
| IPI00328343.7 | Spliceosome RNA helicase BAT1                                                                                                                                                                                                                     | 2              | 1.010     | 0.905     | 0.972     | 0.962   | 0.053 |
| IPI00004839.1 | Crk-like protein                                                                                                                                                                                                                                  | 3              | 1.163     | 1.034     | 0.694     | 0.964   | 0.242 |
| IPI00025252.1 | Protein disulfide-isomerase A3 precursor                                                                                                                                                                                                          | 28             | 0.971     | 0.960     | 0.962     | 0.964   | 0.006 |
| IPI00293867.6 | D-dopachrome decarboxylase                                                                                                                                                                                                                        | 4              | 0.885     | 0.960     | 1.047     | 0.964   | 0.081 |
| IPI00010896.2 | Chloride intracellular channel protein 1                                                                                                                                                                                                          | 10             | 0.990     | 0.953     | 0.951     | 0.964   | 0.022 |
| IPI00030783.1 | Signal transducer and activator of transcription 5A                                                                                                                                                                                               | 6              | 1.075     | 0.996     | 0.823     | 0.965   | 0.129 |
| IPI00220766.3 | Lactoylglutathione lyase                                                                                                                                                                                                                          | 3              | 0.980     | 0.877     | 1.036     | 0.965   | 0.081 |

| IPI number    | Protein name                                                           | Peptide number | forward 1 | reverse 2 | reverse 3 | Average | S.D.  |
|---------------|------------------------------------------------------------------------|----------------|-----------|-----------|-----------|---------|-------|
| IPI00006378.3 | Coiled-coil domain-containing protein 72                               | 3              |           | 0.965     |           | 0.965   |       |
| IPI00024971.1 | Oxysterol-binding protein 1                                            | 3              | 0.926     |           | 1.004     | 0.965   | 0.055 |
| IPI00006935.2 | Eukaryotic translation initiation factor 5A-2                          | 4              | 1.149     | 0.893     | 0.855     | 0.966   | 0.160 |
| IPI00456966.2 | 26 kDa protein                                                         | 6              | 0.980     |           | 0.951     | 0.966   | 0.021 |
| IPI00419237.2 | Leucine aminopeptidase                                                 | 3              | 1.075     | 0.841     | 0.983     | 0.966   | 0.118 |
| IPI00456635.1 | Splice Isoform 1 of Unc-13 homolog D                                   | 6              | 1.111     |           | 0.823     | 0.967   | 0.204 |
| IPI00012268.3 | 26S proteasome non-ATPase regulatory subunit 2                         | 7              | 1.075     | 0.939     | 0.887     | 0.967   | 0.097 |
| IPI00106509.2 | Splice Isoform 4 of Heterogeneous nuclear ribonucleoprotein A/B        | 7              | 1.075     | 0.860     |           | 0.968   | 0.152 |
| IPI00004860.2 | Arginyl-tRNA synthetase                                                | 4              | 1.020     | 1.019     | 0.865     | 0.968   | 0.089 |
| IPI00299155.5 | Proteasome subunit alpha type 4                                        | 5              | 1.010     | 0.881     | 1.015     | 0.969   | 0.076 |
| IPI00032826.1 | Hsc70-interacting protein                                              | 4              | 1.031     | 0.871     | 1.004     | 0.969   | 0.085 |
| IPI00029623.1 | Proteasome subunit alpha type 6                                        | 11             | 1.000     | 0.914     | 0.994     | 0.969   | 0.048 |
| IPI00005159.3 | Actin-like protein 2                                                   | 1              | 1.020     | 0.920     |           | 0.970   | 0.071 |
| IPI00184195.2 | 19 kDa protein                                                         | 2              | 1.075     | 0.866     |           | 0.971   | 0.148 |
| IPI00008274.5 | Adenylyl cyclase-associated protein 1                                  | 11             | 0.943     | 1.114     | 0.855     | 0.971   | 0.132 |
| IPI00328987.3 | Bystin                                                                 | 5              | 0.971     |           |           | 0.971   |       |
| IPI00399318.1 | Epsilon subunit of coatamer protein complex isoform b                  | 3              | 0.971     |           |           | 0.971   |       |
| IPI00006440.4 | Mitochondrial ribosomal protein S7                                     | 2              | 0.971     |           |           | 0.971   |       |
| IPI00025239.2 | NADH-ubiquinone oxidoreductase 49 kDa subunit, mitochondrial precursor | 2              | 0.971     |           |           | 0.971   |       |
| IPI00028481.1 | Ras-related protein Rab-8A                                             | 2              |           | 0.971     |           | 0.971   |       |
| IPI00100197.3 | Splice Isoform 1 of NSFL1 cofactor p47                                 | 3              | 0.971     |           |           | 0.971   |       |
| IPI00464952.2 | Splicing factor arginine/serine-rich 11                                | 2              |           | 0.971     |           | 0.971   |       |
| IPI00021428.1 | Actin, alpha skeletal muscle                                           | 4              | 0.901     | 1.000     | 1.015     | 0.972   | 0.062 |
| IPI00644079.2 | Heterogeneous nuclear ribonucleoprotein U isoform a                    | 2              |           |           | 0.972     | 0.972   |       |
| IPI00165579.6 | PP856                                                                  | 3              |           |           | 0.972     | 0.972   |       |
| IPI00043363.3 | Prickle-like protein 1                                                 | 2              |           |           | 0.972     | 0.972   |       |
| IPI00017373.1 | Replication protein A 14 kDa subunit                                   | 1              |           |           | 0.972     | 0.972   |       |
| IPI00008219.1 | UV excision repair protein RAD23 homolog A                             | 4              |           |           | 0.972     | 0.972   |       |
| IPI00385562.1 | Quaking homolog, KH domain RNA binding isoform HQK-7                   | 2              | 1.111     |           | 0.833     | 0.972   | 0.196 |
| IPI00102936.3 | Splice Isoform 2 of Signal recognition particle 68 kDa protein         | 2              |           | 0.866     | 1.079     | 0.972   | 0.151 |

| IPI number    | Protein name                                                       | Peptide number | forward 1 | reverse 2 | reverse 3 | Average | S.D.  |
|---------------|--------------------------------------------------------------------|----------------|-----------|-----------|-----------|---------|-------|
| IPI00298363.2 | Far upstream element-binding protein 2                             | 7              | 0.943     | 0.970     | 1.004     | 0.973   | 0.031 |
| IPI00171199.4 | Splice Isoform 2 of Proteasome subunit alpha type 3                | 5              | 1.010     | 0.936     | 0.972     | 0.973   | 0.037 |
| IPI00303318.2 | Protein FAM49B                                                     | 3              | 1.111     | 1.070     | 0.737     | 0.973   | 0.205 |
| IPI00017448.1 | 40S ribosomal protein S21                                          | 3              | 0.833     | 0.858     | 1.229     | 0.973   | 0.221 |
| IPI00293464.5 | DNA damage-binding protein 1                                       | 2              |           | 0.954     | 0.994     | 0.974   | 0.028 |
| IPI00009032.1 | Lupus La protein                                                   | 15             | 1.010     | 1.057     | 0.855     | 0.974   | 0.106 |
| IPI00300074.3 | Phenylalanyl-tRNA synthetase beta chain                            | 1              | 0.935     | 1.154     | 0.833     | 0.974   | 0.164 |
| IPI00019894.2 | Splice Isoform 2 of Ubiquitin-conjugating enzyme E2-25 kDa         | 1              | 0.952     | 0.997     |           | 0.975   | 0.031 |
| IPI00166865.3 | Similar to mouse 1500009M05Rik protein                             | 2              |           | 0.975     |           | 0.975   |       |
| IPI00007074.4 | Tyrosyl-tRNA synthetase, cytoplasmic                               | 5              | 1.087     | 0.878     | 0.962     | 0.976   | 0.105 |
| IPI00009071.2 | Splice Isoform 3 of FUS-interacting serine-arginine-rich protein 1 | 4              | 0.971     | 0.980     |           | 0.976   | 0.007 |
| IPI00289499.3 | Bifunctional purine biosynthesis protein PURH                      | 18             | 0.962     | 1.004     | 0.962     | 0.976   | 0.025 |
| IPI00550308.1 | RNA-binding protein 12                                             | 2              | 0.926     |           | 1.026     | 0.976   | 0.071 |
| IPI00306960.3 | Asparaginyl-tRNA synthetase, cytoplasmic                           | 10             | 1.205     |           | 0.748     | 0.976   | 0.323 |
| IPI00216298.5 | Thioredoxin                                                        | 3              |           | 0.977     |           | 0.977   |       |
| IPI00023510.1 | Ras-related protein Rab-5A                                         | 2              | 0.962     | 0.977     | 0.994     | 0.977   | 0.016 |
| IPI00007052.6 | Mitochondria fission 1 protein                                     | 4              |           | 1.175     | 0.780     | 0.977   | 0.279 |
| IPI00022830.3 | Splice Isoform 2 of NSFL1 cofactor p47                             | 2              | 0.833     |           | 1.122     | 0.978   | 0.204 |
| IPI00305668.6 | Mitochondrial 28S ribosomal protein S6                             | 2              |           | 0.978     |           | 0.978   |       |
| IPI00479786.2 | KH-type splicing regulatory protein                                | 2              | 0.952     | 1.004     |           | 0.978   | 0.037 |
| IPI00219129.8 | Ribosyldihydronicotinamide dehydrogenase                           | 4              |           | 1.050     | 0.908     | 0.979   | 0.101 |
| IPI00179330.6 | Ubiquitin and ribosomal protein S27a precursor                     | 18             | 0.962     | 1.058     | 0.919     | 0.979   | 0.071 |
| IPI00002460.2 | Splice Isoform 1 of Annexin A7                                     | 2              | 1.136     | 0.980     | 0.823     | 0.980   | 0.157 |
| IPI00014474.1 | A-kinase anchor protein 8                                          | 2              | 0.980     |           |           | 0.980   |       |
| IPI00022018.1 | Dolichol-phosphate mannosyltransferase                             | 2              | 0.980     |           |           | 0.980   |       |
| IPI00306516.1 | Import inner membrane translocase subunit TIM44, mitocho           | 4              | 0.980     |           |           | 0.980   |       |
| IPI00395887.4 | Thioredoxin domain-containing protein 1 precursor                  | 2              | 0.980     |           |           | 0.980   |       |
| IPI00045921.1 | TOB3                                                               | 2              | 0.980     |           |           | 0.980   |       |
| IPI00016613.2 | CSNK2A1 protein                                                    | 2              | 0.893     |           | 1.068     | 0.981   | 0.124 |
| IPI00374975.2 | Probable phosphoglycerate mutase 4                                 | 2              | 0.962     | 0.945     | 1.036     | 0.981   | 0.049 |
| IPI00031517.1 | DNA replication licensing factor MCM6                              | 3              | 1.064     | 1.069     | 0.812     | 0.982   | 0.147 |

| IPI number    | Protein name                                                                 | Peptide number | forward 1 | reverse 2 | reverse 3 | Average | S.D.  |
|---------------|------------------------------------------------------------------------------|----------------|-----------|-----------|-----------|---------|-------|
| IPI00025091.1 | 40S ribosomal protein S11                                                    | 12             | 0.870     | 0.857     | 1.218     | 0.982   | 0.205 |
| IPI00013508.5 | Alpha-actinin-1                                                              | 7              | 1.010     | 0.984     | 0.951     | 0.982   | 0.030 |
| IPI00219365.2 | Moesin                                                                       | 19             | 1.053     | 0.889     | 1.004     | 0.982   | 0.084 |
| IPI00015602.1 | Mitochondrial precursor proteins import receptor                             | 3              | 1.099     |           | 0.865     | 0.982   | 0.165 |
| IPI00024993.4 | Enoyl-CoA hydratase, mitochondrial precursor                                 | 8              | 1.124     | 0.970     | 0.855     | 0.983   | 0.135 |
| IPI00435950.1 | FP944                                                                        | 2              |           |           | 0.983     | 0.983   |       |
| IPI00171664.2 | Nucleoporin 43kDa                                                            | 2              |           |           | 0.983     | 0.983   |       |
| IPI00000690.1 | Splice Isoform 1 of Programmed cell death protein 8, mitochondrial precursor | 6              | 1.064     | 1.009     | 0.876     | 0.983   | 0.097 |
| IPI00016832.1 | Splice Isoform Short of Proteasome subunit alpha type 1                      | 1              | 0.990     | 0.923     | 1.036     | 0.983   | 0.057 |
| IPI00302176.5 | Splice Isoform 1 of H/ACA ribonucleoprotein complex subunit 1                | 3              | 1.031     | 0.935     |           | 0.983   | 0.068 |
| IPI00140827.2 | PREDICTED: similar to SMT3 suppressor of mif two 3 homolog 2                 | 2              | 1.124     | 0.843     |           | 0.984   | 0.198 |
| IPI00003348.2 | Guanine nucleotide-binding protein G(I)/G(S)/G(T) beta subunit 2             | 5              | 0.952     |           | 1.015     | 0.984   | 0.044 |
| IPI00031522.2 | Trifunctional enzyme alpha subunit, mitochondrial precursor                  | 27             | 1.149     | 1.193     | 0.609     | 0.984   | 0.325 |
| IPI00009901.1 | Nuclear transport factor 2                                                   | 1              |           | 0.984     |           | 0.984   |       |
| IPI00022314.1 | Superoxide dismutase [Mn], mitochondrial precursor                           | 2              |           | 0.953     | 1.015     | 0.984   | 0.043 |
| IPI00000816.1 | 14-3-3 protein epsilon                                                       | 14             | 1.020     | 0.985     | 0.951     | 0.985   | 0.035 |
| IPI00384051.4 | Proteasome activator complex subunit 2                                       | 8              | 1.031     |           | 0.940     | 0.986   | 0.064 |
| IPI00008557.3 | Insulin-like growth factor 2 mRNA binding protein 1                          | 5              | 0.971     | 0.971     | 1.015     | 0.986   | 0.025 |
| IPI00026216.4 | Puromycin-sensitive aminopeptidase                                           | 6              | 1.075     |           | 0.897     | 0.986   | 0.126 |
| IPI00169280.2 | Aflatoxin B1 aldehyde reductase member 4 (Fragment)                          | 2              | 0.820     |           | 1.154     | 0.987   | 0.236 |
| IPI00010154.3 | Rab GDP dissociation inhibitor alpha                                         | 8              | 1.010     | 0.978     | 0.972     | 0.987   | 0.020 |
| IPI00013452.8 | Glutamyl-prolyl tRNA synthetase                                              | 11             | 1.099     | 0.988     | 0.876     | 0.988   | 0.111 |
| IPI00155723.3 | DEAH (Asp-Glu-Ala-His) box polypeptide 9 isoform 2                           | 5              |           | 0.988     |           | 0.988   |       |
| IPI00025512.2 | Heat-shock protein beta-1                                                    | 15             | 0.962     | 1.053     | 0.951     | 0.988   | 0.056 |
| IPI00550363.2 | Transgelin-2                                                                 | 3              | 1.020     | 0.953     | 0.994     | 0.989   | 0.034 |
| IPI00217236.3 | Tubulin-specific chaperone A                                                 | 9              | 1.020     | 0.944     | 1.004     | 0.989   | 0.041 |
| IPI00550689.3 | HSPC117 protein                                                              | 3              | 1.020     | 0.966     | 0.983     | 0.990   | 0.028 |
| IPI00022793.4 | Trifunctional enzyme beta subunit, mitochondrial precursor                   | 3              | 1.124     | 1.226     | 0.620     | 0.990   | 0.325 |
| IPI00026519.1 | Peptidyl-prolyl cis-trans isomerase, mitochondrial precursor                 | 2              |           | 0.990     |           | 0.990   |       |
| IPI00100460.2 | Aspartyl-tRNA synthetase 2                                                   | 2              | 0.990     |           |           | 0.990   |       |



| IPI number    | Protein name                                                                             | Peptide number | forward 1 | reverse 2 | reverse 3 | Average | S.D.  |
|---------------|------------------------------------------------------------------------------------------|----------------|-----------|-----------|-----------|---------|-------|
| IPI00029264.3 | Cytochrome c1, heme protein, mitochondrial precursor                                     | 6              | 0.990     |           |           | 0.990   |       |
| IPI00162199.8 | DKFZP434B0335 protein                                                                    | 1              | 0.990     |           |           | 0.990   |       |
| IPI00260769.3 | Hypothetical protein                                                                     | 4              | 0.990     |           |           | 0.990   |       |
| IPI00641574.1 | Isoleucine-tRNA synthetase                                                               | 2              | 0.990     |           |           | 0.990   |       |
| IPI00554769.1 | Mutant GSTP1                                                                             | 2              | 0.990     |           |           | 0.990   |       |
| IPI00329600.3 | Probable saccharopine dehydrogenase                                                      | 5              | 0.990     |           |           | 0.990   |       |
| IPI00514380.1 | Pyrroline-5-carboxylate reductase family, member 2                                       | 2              | 0.990     |           |           | 0.990   |       |
| IPI00027233.3 | SCO1 protein homolog, mitochondrial precursor                                            | 3              | 0.990     |           |           | 0.990   |       |
| IPI00001676.7 | Splice Isoform 2 of Nuclear protein localization protein                                 | 2              | 0.990     |           |           | 0.990   |       |
| IPI00168235.4 | CDNA FLJ33352 fis, clone BRACE2005087, weakly similar to PRE-MRNA SPLICING HELICASE BRR2 | 6              | 0.980     | 1.000     |           | 0.990   | 0.014 |
| IPI00012066.1 | Poly(rC)-binding protein 2 isoform b                                                     | 5              | 1.042     | 0.969     | 0.962     | 0.991   | 0.044 |
| IPI00010740.1 | Splice Isoform Long of Splicing factor, proline- and glutamine-rich                      | 16             | 0.909     | 1.135     | 0.929     | 0.991   | 0.125 |
| IPI00399212.2 | PREDICTED: similar to Ran-specific GTPase-activating protein                             | 5              | 0.917     | 0.787     | 1.271     | 0.992   | 0.251 |
| IPI00013895.1 | Protein S100-A11                                                                         | 2              |           | 0.992     |           | 0.992   |       |
| IPI00302592.2 | Filamin A, alpha                                                                         | 42             | 0.980     | 1.004     | 0.994     | 0.993   | 0.012 |
| IPI00165360.4 | 3-mercaptopyruvate sulfurtransferase                                                     | 2              |           | 1.196     | 0.791     | 0.993   | 0.287 |
| IPI00376317.3 | Autoantigen RCD8                                                                         | 2              | 1.010     | 0.979     |           | 0.995   | 0.022 |
| IPI00382470.2 | Heat shock protein HSP 90-alpha 2                                                        | 20             | 0.962     | 0.956     | 1.068     | 0.995   | 0.063 |
| IPI00018349.5 | DNA replication licensing factor MCM4                                                    | 6              | 1.031     | 1.060     | 0.897     | 0.996   | 0.087 |
| IPI00026665.1 | Glutaminyl-tRNA synthetase                                                               | 2              | 0.885     | 1.191     | 0.919     | 0.998   | 0.168 |
| IPI00375704.1 | Proteasome subunit beta type (Fragment)                                                  | 8              |           | 1.046     | 0.951     | 0.998   | 0.067 |
| IPI00106668.4 | Splice Isoform A of Mannose-6-phosphate receptor-binding protein                         | 6              | 1.111     |           | 0.887     | 0.999   | 0.159 |
| IPI00291928.7 | Ras-related protein Rab-14                                                               | 5              |           | 0.919     | 1.079     | 0.999   | 0.113 |
| IPI00020436.3 | Ras-related protein Rab-11B                                                              | 11             |           | 0.930     | 1.068     | 0.999   | 0.098 |
| IPI00413451.1 | Hypothetical protein DKFZp686I04222                                                      | 2              | 1.136     | 0.921     | 0.940     | 0.999   | 0.119 |
| IPI00015148.3 | Ras-related protein Rap-1b precursor                                                     | 3              | 1.064     | 0.888     | 1.047     | 1.000   | 0.097 |
| IPI00025019.3 | Proteasome subunit beta type 1                                                           | 9              | 1.031     | 1.104     | 0.865     | 1.000   | 0.122 |
| IPI00172594.3 | 39S ribosomal protein L28, mitochondrial precursor                                       | 3              | 1.000     |           |           | 1.000   |       |
| IPI00019912.2 | Peroxisomal multifunctional enzyme type 2                                                | 2              |           | 1.000     |           | 1.000   |       |
| IPI00165230.1 | Splice Isoform 1 of DAZ-associated protein 1                                             | 3              | 1.000     |           |           | 1.000   |       |

| IPI number    | Protein name                                                                                                                                 | Peptide number | forward 1 | reverse 2 | reverse 3 | Average | S.D.  |
|---------------|----------------------------------------------------------------------------------------------------------------------------------------------|----------------|-----------|-----------|-----------|---------|-------|
| IPI00298887.5 | Splice Isoform 1 of Signal transducer and activator of transcription 3                                                                       | 2              | 1.000     |           |           | 1.000   |       |
| IPI00022202.3 | Splice Isoform A of Phosphate carrier protein, mitochondrial                                                                                 | 5              | 1.000     |           |           | 1.000   |       |
| IPI00029048.2 | Tubulin--tyrosine ligase-like protein 12                                                                                                     | 5              | 1.000     |           |           | 1.000   |       |
| IPI00293276.9 | Macrophage migration inhibitory factor                                                                                                       | 10             | 1.020     | 0.901     | 1.079     | 1.000   | 0.091 |
| IPI00031169.1 | Ras-related protein Rab-2A                                                                                                                   | 3              |           | 1.029     | 0.972     | 1.001   | 0.040 |
| IPI00020599.1 | Calreticulin precursor                                                                                                                       | 6              | 0.990     | 0.943     | 1.068     | 1.001   | 0.063 |
| IPI00016513.5 | Ras-related protein Rab-10                                                                                                                   | 2              |           | 0.901     | 1.100     | 1.001   | 0.141 |
| IPI00215914.4 | ADP-ribosylation factor 1                                                                                                                    | 3              | 1.136     | 0.980     | 0.887     | 1.001   | 0.126 |
| IPI00299571.4 | CDNA FLJ45525 fis, clone BRTHA2026311, highly similar to Protein disulfide isomerase A6                                                      | 2              | 1.010     | 0.969     | 1.026     | 1.002   | 0.029 |
| IPI00009149.2 | Splice Isoform 2 of Suppressor of G2 allele of SKP1                                                                                          | 2              | 1.064     |           | 0.940     | 1.002   | 0.087 |
| IPI00291175.6 | Splice Isoform 1 of Vinculin                                                                                                                 | 51             | 1.000     | 1.012     | 0.994     | 1.002   | 0.010 |
| IPI00002966.1 | Heat shock 70 kDa protein 4                                                                                                                  | 8              | 0.971     | 1.032     | 1.004     | 1.002   | 0.031 |
| IPI00289819.4 | Cation-independent mannose-6-phosphate receptor precursor                                                                                    | 1              |           | 1.075     | 0.929     | 1.002   | 0.103 |
| IPI00219447.6 | Serine/threonine-protein kinase PAK 2                                                                                                        | 5              | 0.820     |           | 1.186     | 1.003   | 0.259 |
| IPI00034319.2 | Splice Isoform A of Protein CutA precursor                                                                                                   | 2              | 0.909     | 1.020     | 1.079     | 1.003   | 0.086 |
| IPI00218570.5 | Phosphoglycerate mutase 2                                                                                                                    | 10             | 1.053     | 0.922     | 1.036     | 1.004   | 0.071 |
| IPI00010414.3 | PDZ and LIM domain protein 1                                                                                                                 | 2              | 1.053     | 1.329     | 0.630     | 1.004   | 0.352 |
| IPI00022881.1 | Splice Isoform 1 of Clathrin heavy chain 2                                                                                                   | 7              | 1.176     | 0.960     | 0.876     | 1.004   | 0.155 |
| IPI00441344.1 | Beta-galactosidase precursor                                                                                                                 | 8              |           |           | 1.004     | 1.004   |       |
| IPI00020906.1 | Inositol monophosphatase                                                                                                                     | 1              |           |           | 1.004     | 1.004   |       |
| IPI00168184.7 | CDNA FLJ34068 fis, clone FCBBF3001918, highly similar to SERINE/THREONINE PROTEIN PHOSPHATASE 2A, 65 kDa REGULATORY SUBUNIT A, ALPHA ISOFORM | 6              | 1.087     | 1.061     | 0.865     | 1.004   | 0.121 |
| IPI00012069.1 | NAD(P)H dehydrogenase [quinone] 1                                                                                                            | 2              | 1.010     | 0.850     | 1.154     | 1.005   | 0.152 |
| IPI00003420.1 | Splice Isoform 1 of Microtubule-associated protein RP/EB family member 2                                                                     | 2              | 0.893     | 1.117     |           | 1.005   | 0.158 |
| IPI00030770.1 | Splice Isoform 1 of Down syndrome critical region protein 2                                                                                  | 1              | 1.020     | 1.164     | 0.833     | 1.006   | 0.166 |
| IPI00549189.3 | Thimet oligopeptidase                                                                                                                        | 2              | 1.020     |           | 0.994     | 1.007   | 0.019 |
| IPI00220014.2 | Isopentenyl-diphosphate delta isomerase                                                                                                      | 2              | 1.176     | 1.183     | 0.662     | 1.007   | 0.299 |
| IPI00478861.3 | 55 kDa protein                                                                                                                               | 4              | 1.087     |           | 0.929     | 1.008   | 0.111 |
| IPI00100160.3 | Splice Isoform 1 of Cullin-associated NEDD8-dissociated protein 1                                                                            | 10             | 1.220     | 1.004     | 0.801     | 1.008   | 0.209 |

| IPI number     | Protein name                                                       | Peptide number | forward 1 | reverse 2 | reverse 3 | Average | S.D.  |
|----------------|--------------------------------------------------------------------|----------------|-----------|-----------|-----------|---------|-------|
| IPI00012345.2  | Splice Isoform SRP55-1 of Splicing factor, arginine/serine-rich 6  | 2              |           | 1.009     |           | 1.009   |       |
| IPI00024175.3  | Splice Isoform 1 of Proteasome subunit alpha type 7                | 2              | 1.020     | 0.983     | 1.026     | 1.010   | 0.024 |
| IPI00218200.7  | B-cell receptor-associated protein 31                              | 6              | 0.769     | 0.893     | 1.368     | 1.010   | 0.316 |
| IPI00007068.1  | Actin-related protein 3-beta isoform 1                             | 2              |           | 1.010     |           | 1.010   |       |
| IPI00419307.2  | Alpha isoform of regulatory subunit A, protein phosphata           | 6              | 1.010     |           |           | 1.010   |       |
| IPI00218782.2  | Capping protein (Actin filament) muscle Z-line, beta               | 2              | 1.010     |           |           | 1.010   |       |
| IPI00395425.3  | HSPC260                                                            | 2              | 1.010     |           |           | 1.010   |       |
| IPI00170877.1  | Mitochondrial ribosomal protein L10 isoform b                      | 3              | 1.010     |           |           | 1.010   |       |
| IPI00328293.2  | Serine\arginine repetitive matrix 1                                | 2              | 1.010     |           |           | 1.010   |       |
| IPI00031608.1  | Spermatogenesis associated 5-like 1                                | 2              | 1.010     |           |           | 1.010   |       |
| IPI00020194.1  | Splice Isoform Short of TATA-binding protein-associated factor 2N  | 3              | 1.010     |           |           | 1.010   |       |
| IPI00413895.2  | Golgi autoantigen, golgin subfamily A member 2                     | 2              | 1.020     | 1.000     |           | 1.010   | 0.014 |
| IPI00514082.1  | Isoleucine-tRNA synthetase                                         | 2              | 1.124     |           | 0.897     | 1.011   | 0.160 |
| IPI00295857.6  | Coatomer subunit alpha                                             | 4              | 1.031     | 0.944     | 1.058     | 1.011   | 0.059 |
| IPI00298520.3  | Hypothetical protein DKFZp686M09245                                | 2              | 0.909     | 1.186     | 0.940     | 1.012   | 0.152 |
| IPI00072377.1  | Splice Isoform 1 of Protein SET                                    | 7              | 1.031     | 1.130     | 0.876     | 1.012   | 0.128 |
| IPI00000792.1  | Quinone oxidoreductase                                             | 11             | 1.042     |           | 0.983     | 1.012   | 0.042 |
| IPI00178083.2  | 29 kDa protein                                                     | 5              | 1.042     | 0.991     | 1.004     | 1.012   | 0.026 |
| IPI00215610.2  | 55 kDa erythrocyte membrane protein                                | 7              | 1.064     | 1.152     | 0.823     | 1.013   | 0.171 |
| IPI00028004.2  | Proteasome subunit beta type 3                                     | 8              | 0.990     | 0.938     | 1.111     | 1.013   | 0.089 |
| IPI00013939.3  | Splice Isoform 1 of Replication protein A 32 kDa subunit           | 3              | 1.075     |           | 0.951     | 1.013   | 0.088 |
| IPI00030911.2  | Vesicle-associated membrane protein 8                              | 3              |           | 1.013     |           | 1.013   |       |
| IPI00182856.10 | Splice Isoform 3 of WD-repeat protein 1                            | 2              |           | 1.002     | 1.026     | 1.014   | 0.017 |
| IPI00170692.4  | Vesicle-associated membrane protein-associated protein A isoform 2 | 3              | 0.855     | 0.990     | 1.197     | 1.014   | 0.172 |
| IPI00000567.1  | HSPC269 (Fragment)                                                 | 2              |           |           | 1.015     | 1.015   |       |
| IPI00007694.4  | Protein phosphatase methylesterase-1                               | 5              | 1.111     |           | 0.919     | 1.015   | 0.136 |
| IPI00006558.3  | Splice Isoform 1 of SH3 domain GRB2-like protein B1                | 2              |           |           | 1.015     | 1.015   |       |
| IPI00217561.1  | Splice Isoform Beta-1C of Integrin beta-1 precursor                | 2              |           |           | 1.015     | 1.015   |       |
| IPI00018206.3  | Aspartate aminotransferase, mitochondrial precursor                | 5              | 1.031     | 1.020     | 0.994     | 1.015   | 0.019 |
| IPI00216318.4  | 14-3-3 protein beta/alpha                                          | 9              | 1.099     | 1.051     | 0.897     | 1.016   | 0.105 |
| IPI00216691.4  | Profilin-1                                                         | 17             | 1.010     | 0.960     | 1.079     | 1.016   | 0.060 |

| IPI number    | Protein name                                                                    | Peptide number | forward 1 | reverse 2 | reverse 3 | Average | S.D.  |
|---------------|---------------------------------------------------------------------------------|----------------|-----------|-----------|-----------|---------|-------|
| IPI00298961.3 | Exportin-1                                                                      | 3              | 1.064     | 0.918     | 1.068     | 1.017   | 0.086 |
| IPI00291412.1 | Ca(2+)/calmodulin-dependent protein kinase phosphatase                          | 3              | 1.031     | 1.241     | 0.780     | 1.017   | 0.231 |
| IPI00099730.3 | Splicing coactivator subunit SRm300                                             | 3              | 1.136     | 0.899     |           | 1.018   | 0.168 |
| IPI00014230.1 | Complement component 1, Q subcomponent-binding protein, mitochondrial precursor | 8              | 1.010     |           | 1.026     | 1.018   | 0.011 |
| IPI00145540.7 | PREDICTED: similar to tropomyosin 3 isoform 2                                   | 2              | 1.075     |           | 0.962     | 1.018   | 0.080 |
| IPI00217966.6 | Lactate dehydrogenase A                                                         | 1              | 0.980     | 1.253     | 0.823     | 1.019   | 0.218 |
| IPI00395769.2 | Splice Isoform Heart of ATP synthase gamma chain, mitochondrial precursor       | 2              | 1.020     | 0.969     | 1.068     | 1.019   | 0.050 |
| IPI00010779.3 | Tropomyosin 4                                                                   | 2              | 1.099     |           | 0.940     | 1.020   | 0.112 |
| IPI00026087.1 | Barrier-to-autointegration factor                                               | 2              | 0.917     |           | 1.122     | 1.020   | 0.145 |
| IPI00026530.4 | ERGIC-53 protein precursor                                                      | 2              | 1.176     | 1.200     | 0.684     | 1.020   | 0.291 |
| IPI00013234.2 | IARS protein                                                                    | 10             | 1.087     | 1.033     | 0.940     | 1.020   | 0.074 |
| IPI00215919.4 | ADP-ribosylation factor 5                                                       | 2              |           | 1.020     |           | 1.020   |       |
| IPI00456429.2 | Ubiquitin and ribosomal protein L40 precursor                                   | 2              |           | 1.020     |           | 1.020   |       |
| IPI00018146.1 | 14-3-3 protein theta                                                            | 7              | 1.111     | 1.074     | 0.876     | 1.020   | 0.126 |
| IPI00185146.4 | Importin-9                                                                      | 4              | 1.020     |           |           | 1.020   |       |
| IPI00658000.1 | Insulin-like growth factor 2 mRNA binding protein 3                             | 2              | 1.020     |           |           | 1.020   |       |
| IPI00182180.1 | OTU domain-containing protein 6B                                                | 2              | 1.020     |           |           | 1.020   |       |
| IPI00098827.1 | Placental protein 25                                                            | 2              |           | 1.020     |           | 1.020   |       |
| IPI00003870.1 | Putative ATP-dependent Clp protease proteolytic subunit, mitochondrial          | 3              | 1.020     |           |           | 1.020   |       |
| IPI00008380.1 | Serine/threonine-protein phosphatase 2A catalytic subunit                       | 4              | 1.020     |           |           | 1.020   |       |
| IPI00006025.1 | Splice Isoform 1 of Squamous cell carcinoma antigen recognized by T-cells 3     | 9              | 1.020     |           |           | 1.020   |       |
| IPI00006451.5 | Vesicle-fusing ATPase                                                           | 2              | 1.020     |           |           | 1.020   |       |
| IPI00298547.3 | Protein DJ-1                                                                    | 10             | 0.971     | 1.023     | 1.068     | 1.021   | 0.049 |
| IPI00026546.1 | Platelet-activating factor acetylhydrolase IB beta subunit                      | 2              | 1.075     | 1.058     | 0.929     | 1.021   | 0.080 |
| IPI00000861.1 | Splice Isoform 1 of LIM and SH3 domain protein 1                                | 4              | 1.136     | 1.137     | 0.791     | 1.021   | 0.200 |
| IPI00017367.5 | Radixin                                                                         | 8              | 1.111     | 0.960     | 0.994     | 1.022   | 0.079 |
| IPI00007682.2 | Vacuolar ATP synthase catalytic subunit A, ubiquitous isoform                   | 5              | 1.124     | 1.038     | 0.908     | 1.023   | 0.108 |
| IPI00456969.1 | Dynein heavy chain, cytosolic                                                   | 14             | 1.389     | 1.008     | 0.673     | 1.023   | 0.358 |

| IPI number        | Protein name                                                       | Peptide number | forward 1 | reverse 2 | reverse 3 | Average | S.D.  |
|-------------------|--------------------------------------------------------------------|----------------|-----------|-----------|-----------|---------|-------|
| IPI00215901.1     | Adenylate kinase 2 isoform a                                       | 3              | 1.010     | 0.852     | 1.207     | 1.023   | 0.178 |
| IPI00003588.1     | Eukaryotic translation elongation factor 1 epsilon-1               | 3              | 0.952     | 1.094     |           | 1.023   | 0.100 |
| IPI00185919.3     | Splice Isoform 1 of La-related protein 1                           | 4              | 0.885     | 1.163     |           | 1.024   | 0.197 |
| IPI00163187.9     | Fascin                                                             | 14             | 1.000     | 1.132     | 0.940     | 1.024   | 0.098 |
| IPI00218493.6     | Hypoxanthine-guanine phosphoribosyltransferase                     | 3              | 0.980     | 1.120     | 0.972     | 1.024   | 0.083 |
| IPI00418262.3     | Fructose-bisphosphate aldolase C                                   | 2              | 1.136     | 1.040     | 0.897     | 1.025   | 0.120 |
| IPI00022745.1     | Diphosphomevalonate decarboxylase                                  | 6              |           |           | 1.026     | 1.026   |       |
| REV_25025_Protein | no description                                                     | 6              |           |           | 1.026     | 1.026   |       |
| IPI00216256.2     | Splice Isoform 2 of WD-repeat protein 1                            | 1              |           |           | 1.026     | 1.026   |       |
| IPI00013214.1     | DNA replication licensing factor MCM3                              | 7              | 1.020     | 1.043     | 1.015     | 1.026   | 0.015 |
| IPI00011126.6     | 26S protease regulatory subunit 4                                  | 4              | 1.042     | 1.097     | 0.940     | 1.026   | 0.079 |
| IPI00183920.1     | BA395L14.12                                                        | 5              | 1.266     | 1.016     | 0.801     | 1.028   | 0.233 |
| IPI00294879.1     | Ran GTPase-activating protein 1                                    | 2              | 0.763     | 1.530     | 0.791     | 1.028   | 0.435 |
| IPI00299095.1     | Sorting nexin-2                                                    | 2              | 1.087     | 0.962     | 1.036     | 1.028   | 0.063 |
| IPI00063234.1     | PRKAR2A protein                                                    | 2              |           | 1.020     | 1.036     | 1.028   | 0.011 |
| IPI00303882.2     | Splice Isoform B of Mannose-6-phosphate receptor-binding protein 1 | 2              | 1.087     | 1.166     | 0.833     | 1.029   | 0.174 |
| IPI00008603.1     | Actin, aortic smooth muscle                                        | 2              | 0.962     | 0.909     | 1.218     | 1.029   | 0.165 |
| IPI00219953.5     | Cytidylate kinase                                                  | 4              | 1.136     | 0.929     | 1.026     | 1.030   | 0.104 |
| IPI00070643.6     | Splice Isoform Long of FAS-associated factor 1                     | 1              | 1.042     | 1.020     |           | 1.031   | 0.015 |
| IPI00003815.1     | Rho GDP-dissociation inhibitor 1                                   | 7              | 0.901     | 0.888     | 1.303     | 1.031   | 0.236 |
| IPI00641706.1     | 46 kDa protein                                                     | 1              | 1.031     |           |           | 1.031   |       |
| IPI00005160.2     | Actin-related protein 2/3 complex subunit 1B                       | 2              | 1.031     |           |           | 1.031   |       |
| IPI00011200.4     | D-3-phosphoglycerate dehydrogenase                                 | 2              | 1.031     |           |           | 1.031   |       |
| IPI00301107.5     | Importin-11                                                        | 2              | 1.031     |           |           | 1.031   |       |
| IPI00295625.2     | Succinyl-CoA ligase [GDP-forming] alpha-chain, mitochondrial       | 7              | 1.031     |           |           | 1.031   |       |
| IPI00220739.2     | Membrane-associated progesterone receptor component 1              | 1              | 1.266     | 0.909     | 0.919     | 1.031   | 0.203 |
| IPI00021263.3     | 14-3-3 protein zeta/delta                                          | 18             | 1.099     | 1.012     | 0.983     | 1.031   | 0.060 |
| IPI00296913.1     | ADP-sugar pyrophosphatase                                          | 3              | 1.149     | 0.812     | 1.132     | 1.031   | 0.190 |
| IPI00027175.1     | Sorcin                                                             | 3              | 0.990     | 1.076     |           | 1.033   | 0.060 |
| IPI00294911.1     | Succinate dehydrogenase [ubiquinone] iron-sulfur protein,          | 2              | 1.087     | 1.243     | 0.769     | 1.033   | 0.241 |

| IPI number    | Protein name                                                                          | Peptide number | forward 1 | reverse 2 | reverse 3 | Average | S.D.  |
|---------------|---------------------------------------------------------------------------------------|----------------|-----------|-----------|-----------|---------|-------|
|               | mitochondrial precursor                                                               |                |           |           |           |         |       |
| IPI00470467.4 | NADPH--cytochrome P450 reductase                                                      | 2              | 1.266     | 0.971     | 0.865     | 1.034   | 0.208 |
| IPI00216008.3 | Splice Isoform Long of Glucose-6-phosphate 1-dehydrogenase                            | 11             | 1.064     | 1.087     | 0.951     | 1.034   | 0.073 |
| IPI00304692.1 | Heterogeneous nuclear ribonucleoprotein G                                             | 5              | 1.266     | 0.803     |           | 1.034   | 0.327 |
| IPI00018671.1 | Dual specificity protein phosphatase 3                                                | 2              |           | 1.035     |           | 1.035   |       |
| IPI00027382.1 | Splice Isoform 2 of Serine/threonine-protein kinase PAK 3                             | 2              | 0.926     |           | 1.143     | 1.035   | 0.154 |
| IPI00183274.2 | Sorting nexin 1 isoform c                                                             | 2              | 1.136     | 0.975     | 0.994     | 1.035   | 0.088 |
| IPI00007321.1 | Splice Isoform 1 of Acyl-protein thioesterase 1                                       | 3              | 1.042     | 0.952     | 1.111     | 1.035   | 0.080 |
| IPI00002134.3 | 26S proteasome non-ATPase regulatory subunit 5                                        | 9              | 1.163     |           | 0.908     | 1.035   | 0.180 |
| IPI00027444.1 | Leukocyte elastase inhibitor                                                          | 13             | 1.163     |           | 0.908     | 1.035   | 0.180 |
| IPI00479877.4 | 4-trimethylaminobutyraldehyde dehydrogenase                                           | 5              |           |           | 1.036     | 1.036   |       |
| IPI00006663.1 | Aldehyde dehydrogenase, mitochondrial precursor                                       | 2              |           |           | 1.036     | 1.036   |       |
| IPI00003921.2 | Splice Isoform 1 of Protein 4.1                                                       | 1              | 1.111     | 0.962     |           | 1.036   | 0.106 |
| IPI00016621.6 | AP-2 complex subunit alpha-2                                                          | 1              | 1.149     | 1.000     | 0.962     | 1.037   | 0.099 |
| IPI00418823.3 | PREDICTED: similar to lactate dehydrogenase A-like 6B                                 | 2              | 1.220     |           | 0.855     | 1.037   | 0.258 |
| IPI00013297.1 | 28 kDa heat- and acid-stable phosphoprotein                                           | 2              | 1.190     | 1.120     | 0.801     | 1.037   | 0.207 |
| IPI00021812.1 | Neuroblast differentiation-associated protein AHNAK (Fragment)                        | 18             | 1.124     | 1.241     | 0.748     | 1.037   | 0.257 |
| IPI00219029.2 | Aspartate aminotransferase, cytoplasmic                                               | 7              | 1.124     | 1.070     | 0.919     | 1.037   | 0.106 |
| IPI00026089.3 | Splicing factor 3B subunit 1                                                          | 7              | 1.053     | 1.024     |           | 1.038   | 0.020 |
| IPI00024919.3 | Thioredoxin-dependent peroxide reductase, mitochondrial precursor                     | 9              | 1.031     | 1.007     | 1.079     | 1.039   | 0.037 |
| IPI00022977.1 | Creatine kinase B-type                                                                | 13             | 1.031     | 1.018     | 1.068     | 1.039   | 0.026 |
| IPI00017341.2 | Splicing factor 3A subunit 2                                                          | 2              | 0.893     |           | 1.186     | 1.039   | 0.207 |
| IPI00029267.1 | U2 small nuclear ribonucleoprotein B''                                                | 5              | 1.099     | 0.980     |           | 1.040   | 0.084 |
| IPI00103994.4 | Leucyl-tRNA synthetase, cytoplasmic                                                   | 4              | 1.124     | 0.956     |           | 1.040   | 0.119 |
| IPI00005162.2 | Actin-related protein 2/3 complex subunit 3                                           | 2              |           | 1.040     |           | 1.040   |       |
| IPI00239077.4 | Histidine triad nucleotide-binding protein 1                                          | 11             | 1.124     | 0.921     | 1.079     | 1.041   | 0.106 |
| IPI00027497.4 | Glucose-6-phosphate isomerase                                                         | 22             | 1.020     | 1.089     | 1.015     | 1.041   | 0.041 |
| IPI00060200.3 | Aldose 1-epimerase                                                                    | 2              | 1.042     |           |           | 1.042   |       |
| IPI00386354.1 | CDNA FLJ14048 fis, clone HEMBA1006650, weakly similar to ARP2/3 COMPLEX 20 KD SUBUNIT | 3              |           | 1.042     |           | 1.042   |       |
| IPI00005087.1 | Tropomodulin-3                                                                        | 3              | 1.042     |           |           | 1.042   |       |

| IPI number     | Protein name                                                    | Peptide number | forward 1 | reverse 2 | reverse 3 | Average | S.D.  |
|----------------|-----------------------------------------------------------------|----------------|-----------|-----------|-----------|---------|-------|
| IPI00024067.3  | Clathrin heavy chain 1                                          | 22             | 1.064     | 1.016     | 1.047     | 1.042   | 0.024 |
| IPI00018931.6  | Vacuolar protein sorting 35                                     | 8              | 1.042     | 1.043     |           | 1.042   | 0.001 |
| IPI00479186.4  | Pyruvate kinase 3 isoform 1                                     | 5              | 1.111     | 0.916     | 1.100     | 1.043   | 0.110 |
| IPI00037448.3  | Glyoxylate reductase/hydroxypyruvate reductase                  | 7              | 1.124     |           | 0.962     | 1.043   | 0.115 |
| IPI00291006.1  | Malate dehydrogenase, mitochondrial precursor                   | 4              | 1.087     | 1.070     | 0.972     | 1.043   | 0.062 |
| IPI00034049.1  | Splice Isoform 1 of Regulator of nonsense transcripts 1         | 3              | 1.136     | 0.952     |           | 1.044   | 0.130 |
| IPI00012837.1  | Kinesin heavy chain                                             | 6              | 1.064     | 1.163     | 0.908     | 1.045   | 0.128 |
| IPI00015955.5  | Exosome complex exonuclease RRP46                               | 2              | 1.205     | 0.885     |           | 1.045   | 0.226 |
| IPI00296053.3  | Fumarate hydratase, mitochondrial precursor                     | 6              | 1.087     | 1.023     | 1.026     | 1.045   | 0.036 |
| IPI00021327.3  | Splice Isoform 1 of Growth factor receptor-bound protein 2      | 3              |           | 1.045     |           | 1.045   |       |
| IPI00440493.2  | ATP synthase alpha chain, mitochondrial precursor               | 25             | 1.075     | 1.014     | 1.047     | 1.045   | 0.031 |
| IPI00062206.1  | DEAD (Asp-Glu-Ala-Asp) box polypeptide 39, isoform 2            | 2              | 1.042     | 0.943     | 1.154     | 1.046   | 0.105 |
| IPI00033494.3  | Myosin regulatory light chain                                   | 2              | 1.149     | 0.943     |           | 1.046   | 0.146 |
| IPI00395865.4  | Histone-binding protein RBBP7                                   | 2              |           |           | 1.047     | 1.047   |       |
| IPI00328415.10 | NADH-cytochrome b5 reductase                                    | 2              | 0.962     |           | 1.132     | 1.047   | 0.121 |
| IPI00219291.3  | Splice Isoform 2 of ATP synthase f chain, mitochondrial         | 4              |           | 1.047     |           | 1.047   |       |
| IPI00021439.1  | Actin, cytoplasmic 1                                            | 28             | 0.971     | 0.987     | 1.186     | 1.048   | 0.120 |
| IPI00643920.2  | Transketolase                                                   | 11             | 1.064     | 0.929     | 1.154     | 1.049   | 0.113 |
| IPI00021347.1  | Ubiquitin-conjugating enzyme E2 L3                              | 3              | 1.053     | 1.071     | 1.026     | 1.050   | 0.023 |
| IPI00003856.1  | Vacuolar ATP synthase subunit E                                 | 2              | 0.962     | 1.175     | 1.015     | 1.050   | 0.111 |
| IPI00017672.4  | Hypothetical protein FLJ25678                                   | 5              | 1.031     | 1.042     | 1.079     | 1.051   | 0.025 |
| IPI00303476.1  | ATP synthase beta chain, mitochondrial precursor                | 9              | 1.042     | 1.085     | 1.026     | 1.051   | 0.031 |
| IPI00022774.2  | Transitional endoplasmic reticulum ATPase                       | 28             | 1.020     | 1.075     | 1.058     | 1.051   | 0.028 |
| IPI00007423.1  | Acidic leucine-rich nuclear phosphoprotein 32 family member B   | 9              | 1.149     | 1.160     | 0.844     | 1.051   | 0.180 |
| IPI00646779.2  | TUBB6 protein                                                   | 2              | 1.282     |           | 0.823     | 1.052   | 0.325 |
| IPI00001663.1  | Splice Isoform 1 of Serine protease HTRA2, mitochondrial        | 2              | 1.053     |           |           | 1.053   |       |
| IPI00028006.1  | Proteasome subunit beta type 2                                  | 2              |           | 0.899     | 1.207     | 1.053   | 0.218 |
| IPI00169383.2  | Phosphoglycerate kinase 1                                       | 25             | 1.136     | 1.031     | 0.994     | 1.054   | 0.074 |
| IPI00219446.4  | Phosphatidylethanolamine-binding protein                        | 11             | 1.020     | 1.009     | 1.132     | 1.054   | 0.068 |
| IPI00025054.1  | Splice Isoform Long of Heterogenous nuclear ribonucleoprotein U | 2              | 1.136     | 1.024     | 1.004     | 1.055   | 0.071 |
| IPI00218693.7  | Adenine phosphoribosyltransferase                               | 9              | 1.124     | 0.953     | 1.090     | 1.055   | 0.091 |

| IPI number    | Protein name                                                                     | Peptide number | forward 1 | reverse 2 | reverse 3 | Average | S.D.  |
|---------------|----------------------------------------------------------------------------------|----------------|-----------|-----------|-----------|---------|-------|
| IPI00103467.3 | Aldehyde dehydrogenase X, mitochondrial precursor                                | 2              |           |           | 1.058     | 1.058   |       |
| IPI00025974.3 | Charged multivesicular body protein 4b                                           | 2              |           |           | 1.058     | 1.058   |       |
| IPI00604756.2 | Nuclear receptor-binding protein                                                 | 2              |           |           | 1.058     | 1.058   |       |
| IPI00009790.1 | 6-phosphofructokinase type C                                                     | 3              | 0.980     | 0.880     | 1.314     | 1.058   | 0.227 |
| IPI00147874.1 | Sialic acid synthase                                                             | 4              | 1.087     | 1.053     | 1.036     | 1.059   | 0.026 |
| IPI00334627.2 | Similar to annexin A2 isoform 1                                                  | 4              | 1.205     | 1.129     | 0.844     | 1.059   | 0.190 |
| IPI00016610.2 | Poly(rC)-binding protein 1                                                       | 12             | 1.075     | 1.057     | 1.047     | 1.060   | 0.014 |
| IPI00016786.1 | Splice Isoform 2 of Cell division control protein 42 homolog precursor           | 6              | 0.990     |           | 1.132     | 1.061   | 0.101 |
| IPI00012998.2 | Splice Isoform 1 of Cleavage and polyadenylation specificity factor 6            | 2              | 1.124     | 1.134     | 0.929     | 1.062   | 0.115 |
| IPI00218848.4 | ATP synthase e chain, mitochondrial                                              | 2              | 1.176     | 0.949     |           | 1.063   | 0.161 |
| IPI00027443.4 | Cysteinyl-tRNA synthetase isoform c                                              | 3              | 1.176     |           | 0.951     | 1.064   | 0.160 |
| IPI00026215.1 | Flap endonuclease 1                                                              | 7              | 1.064     |           |           | 1.064   |       |
| IPI00010090.1 | Glutamate--cysteine ligase regulatory subunit                                    | 4              | 1.064     |           |           | 1.064   |       |
| IPI00006213.1 | Pericentriol material 1                                                          | 2              |           | 1.064     |           | 1.064   |       |
| IPI00413587.2 | Splice Isoform 1 of BH3-interacting domain death agonist                         | 6              |           | 1.064     |           | 1.064   |       |
| IPI00024502.2 | Ubiquilin-4                                                                      | 2              | 1.064     |           |           | 1.064   |       |
| IPI00000051.4 | Prefoldin subunit 1                                                              | 2              |           | 0.870     | 1.261     | 1.065   | 0.277 |
| IPI00010270.1 | Ras-related C3 botulinum toxin substrate 2 precursor                             | 4              |           | 1.019     | 1.111     | 1.065   | 0.065 |
| IPI00337741.4 | Acylamino-acid-releasing enzyme                                                  | 4              | 1.010     | 1.000     | 1.186     | 1.065   | 0.105 |
| IPI00029468.1 | Alpha-centractin                                                                 | 2              | 1.266     | 1.087     | 0.844     | 1.066   | 0.212 |
| IPI00552186.2 | Hypothetical protein DKFZp313O211                                                | 3              | 1.031     | 1.102     |           | 1.066   | 0.050 |
| IPI00166749.3 | Mitochondrial-processing peptidase alpha subunit, mitochondrial precursor        | 1              | 1.163     |           | 0.972     | 1.068   | 0.135 |
| IPI00012011.5 | Cofilin-1                                                                        | 21             | 1.099     | 1.080     | 1.026     | 1.068   | 0.038 |
| IPI00479359.6 | villin 2                                                                         | 2              | 1.124     | 0.873     | 1.207     | 1.068   | 0.174 |
| IPI00098902.4 | Oxoglutarate (alpha-ketoglutarate) dehydrogenase (lipoamide) isoform 1 precursor | 2              |           |           | 1.068     | 1.068   |       |
| IPI00013862.7 | Thymidylate kinase                                                               | 4              |           | 1.069     |           | 1.069   |       |
| IPI00030919.3 | Mitogen-activated protein kinase kinase 1-interacting protein 1                  | 3              |           | 1.070     |           | 1.070   |       |
| IPI00258804.1 | ATPase inhibitory factor 1 isoform 3 precursor                                   | 2              |           | 1.070     |           | 1.070   |       |



| IPI number    | Protein name                                                                     | Peptide number | forward 1 | reverse 2 | reverse 3 | Average | S.D.  |
|---------------|----------------------------------------------------------------------------------|----------------|-----------|-----------|-----------|---------|-------|
| IPI0000811.2  | Proteasome subunit beta type 6 precursor                                         | 6              | 0.990     | 1.098     | 1.122     | 1.070   | 0.070 |
| IPI00216951.2 | Aspartyl-tRNA synthetase                                                         | 2              | 1.282     | 0.858     |           | 1.070   | 0.300 |
| IPI00220834.7 | ATP-dependent DNA helicase 2 subunit 2                                           | 2              | 1.042     | 1.187     | 0.983     | 1.070   | 0.105 |
| IPI00328319.7 | Histone-binding protein RBBP4                                                    | 5              | 1.031     |           | 1.111     | 1.071   | 0.057 |
| IPI00179953.2 | Splice Isoform 1 of Nuclear autoantigenic sperm protein                          | 8              | 1.149     | 1.099     | 0.972     | 1.073   | 0.091 |
| IPI00004397.1 | Ras-related protein Ral-B                                                        | 2              | 1.020     | 1.036     | 1.165     | 1.074   | 0.079 |
| IPI00002324.4 | Methionine adenosyltransferase II, beta isoform 1                                | 2              | 1.220     | 0.935     | 1.068     | 1.074   | 0.143 |
| IPI00465028.6 | Triosephosphate isomerase                                                        | 5              | 1.111     | 0.990     | 1.122     | 1.074   | 0.073 |
| IPI00008418.5 | Splice Isoform 1 of Diablo homolog, mitochondrial precursor                      | 2              |           | 1.060     | 1.090     | 1.075   | 0.021 |
| IPI00165393.1 | Acidic leucine-rich nuclear phosphoprotein 32 family member E                    | 5              | 1.149     | 1.136     | 0.940     | 1.075   | 0.117 |
| IPI00020672.4 | Splice Isoform 1 of Dipeptidyl-peptidase 3                                       | 5              | 1.111     | 1.110     | 1.004     | 1.075   | 0.061 |
| IPI00009841.4 | CDNA FLJ31747 fis, clone NT2RI2007377, highly similar to RNA-BINDING PROTEIN EWS | 2              | 1.075     |           |           | 1.075   |       |
| IPI00168317.1 | Hypothetical protein FLJ90806                                                    | 2              |           | 1.075     |           | 1.075   |       |
| IPI00005050.1 | Mitochondrial 28S ribosomal protein S14                                          | 2              |           | 1.075     |           | 1.075   |       |
| IPI00032139.1 | Serpin B9                                                                        | 4              | 1.075     |           |           | 1.075   |       |
| IPI00221106.5 | Splicing factor 3B subunit 2                                                     | 8              | 1.042     | 1.011     | 1.175     | 1.076   | 0.087 |
| IPI00419585.8 | Peptidyl-prolyl cis-trans isomerase A                                            | 3              | 1.124     | 0.974     | 1.132     | 1.077   | 0.089 |
| IPI00216697.2 | Ankyrin 1 isoform 1                                                              | 4              | 1.042     | 1.112     |           | 1.077   | 0.050 |
| IPI00025849.1 | Acidic leucine-rich nuclear phosphoprotein 32 family member A                    | 11             | 1.190     | 0.983     | 1.058     | 1.077   | 0.105 |
| IPI00248321.8 | PREDICTED: similar to peptidylprolyl isomerase A isoform 1                       | 2              | 0.990     |           | 1.165     | 1.077   | 0.123 |
| IPI00383046.2 | Hypothetical protein LOC134147                                                   | 2              |           | 1.057     | 1.100     | 1.079   | 0.031 |
| IPI00301518.5 | Mob4B protein                                                                    | 1              |           |           | 1.079     | 1.079   |       |
| IPI00514832.2 | Tripartite motif protein 56                                                      | 1              |           |           | 1.079     | 1.079   |       |
| IPI00020495.1 | Mitochondrial 28S ribosomal protein S36                                          | 7              |           | 1.080     |           | 1.080   |       |
| IPI00007102.3 | CGI-150 protein                                                                  | 2              | 1.136     | 0.982     | 1.122     | 1.080   | 0.085 |
| IPI00215884.3 | Splicing factor, arginine/serine-rich 1                                          | 4              | 1.299     | 0.862     |           | 1.080   | 0.309 |
| IPI00025084.3 | Calpain small subunit 1                                                          | 3              | 1.111     | 1.053     | 1.079     | 1.081   | 0.029 |
| IPI00003217.3 | Proteasome subunit beta type 7 precursor                                         | 2              | 1.149     |           | 1.015     | 1.082   | 0.095 |
| IPI00032830.1 | Splice Isoform 1 of Oligoribonuclease, mitochondrial precursor (Fragment)        | 2              | 1.099     | 1.154     | 0.994     | 1.082   | 0.082 |

| IPI number     | Protein name                                                               | Peptide number | forward 1 | reverse 2 | reverse 3 | Average | S.D.  |
|----------------|----------------------------------------------------------------------------|----------------|-----------|-----------|-----------|---------|-------|
| IPI00030229.4  | UDP-galactose-4-epimerase                                                  | 2              | 1.163     |           | 1.004     | 1.084   | 0.112 |
| IPI00305304.3  | LAG1 longevity assurance homolog 2                                         | 2              | 1.031     | 1.136     |           | 1.084   | 0.075 |
| IPI00397526.1  | Myosin-10                                                                  | 4              | 1.235     | 0.933     |           | 1.084   | 0.213 |
| IPI00017726.1  | Hydroxyacyl-Coenzyme A dehydrogenase, type II isoform 1                    | 10             | 1.136     | 1.037     | 1.079     | 1.084   | 0.050 |
| IPI00027442.3  | Alanyl-tRNA synthetase                                                     | 3              | 1.266     | 1.047     | 0.940     | 1.084   | 0.166 |
| IPI00013122.1  | Hsp90 co-chaperone Cdc37                                                   | 3              | 1.087     | 1.123     | 1.047     | 1.086   | 0.038 |
| IPI00099871.1  | 39S ribosomal protein L40, mitochondrial precursor                         | 2              | 1.087     |           |           | 1.087   |       |
| IPI00154975.3  | DnaJ homolog subfamily C member 9                                          | 3              | 1.087     |           |           | 1.087   |       |
| IPI00023086.3  | Mitochondrial ribosomal protein L15                                        | 3              | 1.087     |           |           | 1.087   |       |
| IPI00007928.4  | Pre-mRNA-processing-splicing factor 8                                      | 2              |           | 1.087     |           | 1.087   |       |
| IPI00028083.1  | Translation initiation factor eIF-2B beta subunit                          | 3              | 1.087     |           |           | 1.087   |       |
| IPI00019385.1  | Translocon-associated protein delta subunit precursor                      | 2              |           | 1.087     |           | 1.087   |       |
| IPI00291419.5  | Acetyl-CoA acetyltransferase, cytosolic                                    | 2              | 1.136     | 1.122     | 1.004     | 1.088   | 0.072 |
| IPI00550069.2  | Ribonuclease inhibitor                                                     | 4              | 1.250     | 1.163     | 0.855     | 1.089   | 0.208 |
| IPI00290614.7  | Endonuclease G, mitochondrial precursor                                    | 2              | 0.952     | 1.227     |           | 1.090   | 0.194 |
| IPI00038378.4  | E-1 enzyme                                                                 | 2              | 1.316     |           | 0.865     | 1.091   | 0.318 |
| IPI00451401.2  | Splice Isoform 2 of Triosephosphate isomerase                              | 11             | 1.099     | 1.067     | 1.111     | 1.092   | 0.023 |
| IPI00018188.3  | Splice Isoform 1 of Adaptin ear-binding coat-associated protein 2          | 2              | 1.020     |           | 1.165     | 1.092   | 0.102 |
| IPI00219757.12 | Glutathione S-transferase P                                                | 14             | 1.111     | 1.098     | 1.068     | 1.093   | 0.022 |
| IPI00221328.2  | Chloride intracellular channel protein 2                                   | 3              | 1.099     | 1.142     | 1.036     | 1.093   | 0.053 |
| IPI00006865.2  | Vesicle trafficking protein SEC22b                                         | 8              |           | 1.094     |           | 1.094   |       |
| IPI00005719.1  | RAB1A, member RAS oncogene family                                          | 6              |           | 0.950     | 1.239     | 1.095   | 0.205 |
| IPI00073603.3  | Peptidyl-prolyl cis-trans isomerase                                        | 2              | 1.250     |           | 0.940     | 1.095   | 0.219 |
| IPI00027341.1  | Macrophage capping protein                                                 | 2              | 1.149     | 0.855     | 1.282     | 1.095   | 0.219 |
| IPI00003269.1  | Hypothetical protein LOC345651                                             | 2              | 0.980     | 0.952     | 1.357     | 1.097   | 0.226 |
| IPI00304082.7  | ISOC1 protein                                                              | 3              | 1.149     |           | 1.047     | 1.098   | 0.072 |
| IPI00304814.3  | Phospholipid hydroperoxide glutathione peroxidase, mitochondrial precursor | 2              |           | 1.099     |           | 1.099   |       |
| IPI00470610.3  | Pyrroline-5-carboxylate reductase 2                                        | 3              | 1.099     |           |           | 1.099   |       |
| IPI00299086.3  | Syntenin-1                                                                 | 3              | 1.099     |           |           | 1.099   |       |
| IPI00025815.1  | TAR DNA-binding protein 43                                                 | 4              | 1.099     |           |           | 1.099   |       |

| IPI number    | Protein name                                                                           | Peptide number | forward 1 | reverse 2 | reverse 3 | Average | S.D.  |
|---------------|----------------------------------------------------------------------------------------|----------------|-----------|-----------|-----------|---------|-------|
| IPI00017451.1 | Splicing factor 3 subunit 1                                                            | 5              | 1.136     | 0.965     | 1.197     | 1.099   | 0.120 |
| IPI00168388.1 | Splice Isoform 1 of Signal recognition particle 68 kDa protein                         | 3              | 1.099     | 1.067     | 1.132     | 1.099   | 0.033 |
| IPI00037283.2 | Splice Isoform 5 of Dynamin-1-like protein                                             | 2              | 1.075     | 1.124     |           | 1.099   | 0.034 |
| IPI00303954.3 | Cytochrome b5 outer mitochondrial membrane precursor                                   | 4              |           |           | 1.100     | 1.100   |       |
| IPI00027165.3 | Splice Isoform R-type of Pyruvate kinase isozymes R/L                                  | 10             | 0.980     | 1.136     | 1.186     | 1.101   | 0.107 |
| IPI00063827.1 | Splice Isoform 1 of Abhydrolase domain-containing protein 14B                          | 2              | 1.266     | 1.065     | 0.972     | 1.101   | 0.150 |
| IPI00003438.1 | DnaJ (Hsp40) homolog, subfamily C, member 8                                            | 2              | 1.124     | 1.178     | 1.004     | 1.102   | 0.089 |
| IPI00030116.1 | Splice Isoform 1 of Phosphoacetylglucosamine mutase                                    | 2              | 1.449     | 1.099     | 0.759     | 1.102   | 0.345 |
| IPI00383071.1 | RcTPI1 (Fragment)                                                                      | 15             | 1.136     | 1.062     | 1.111     | 1.103   | 0.038 |
| IPI00001159.9 | GCN1-like protein 1                                                                    | 9              | 1.163     | 1.045     |           | 1.104   | 0.083 |
| IPI00024157.1 | FK506-binding protein 3                                                                | 2              | 1.042     | 1.167     |           | 1.104   | 0.089 |
| IPI00017855.1 | Aconitate hydratase, mitochondrial precursor                                           | 3              | 1.136     | 1.131     | 1.047     | 1.105   | 0.050 |
| IPI00017510.3 | Cytochrome c oxidase subunit 2                                                         | 4              |           | 1.105     |           | 1.105   |       |
| IPI00026185.5 | Splice Isoform 1 of F-actin capping protein beta subunit                               | 7              | 1.087     | 1.176     | 1.058     | 1.107   | 0.062 |
| IPI00007189.1 | Splice Isoform 1 of Cell division control protein 42 homolog precursor                 | 2              |           | 1.302     | 0.919     | 1.110   | 0.271 |
| IPI00219219.2 | Galectin-1                                                                             | 5              | 1.053     | 1.125     | 1.154     | 1.110   | 0.052 |
| IPI00165467.5 | 55 kDa protein                                                                         | 4              | 1.111     |           |           | 1.111   |       |
| IPI00017381.1 | Activator 1 37 kDa subunit                                                             | 2              | 1.111     |           |           | 1.111   |       |
| IPI00023503.3 | Cell division protein kinase 3                                                         | 2              | 1.111     |           |           | 1.111   |       |
| IPI00008453.3 | Coronin-1C                                                                             | 2              | 1.111     |           |           | 1.111   |       |
| IPI00014938.2 | Nuclear protein Hcc-1                                                                  | 7              | 1.111     |           |           | 1.111   |       |
| IPI00010080.2 | Serine/threonine-protein kinase OSR1                                                   | 2              | 1.111     |           |           | 1.111   |       |
| IPI00217952.6 | Splice Isoform 1 of Glucosamine--fructose-6-phosphate aminotransferase [isomerizing] 1 | 2              | 1.111     |           |           | 1.111   |       |
| IPI00021983.1 | Splice Isoform 1 of Nicastrin precursor                                                | 2              |           |           | 1.111     | 1.111   |       |
| IPI00176678.8 | RcADH5 (Fragment)                                                                      | 3              | 1.053     | 1.150     | 1.132     | 1.112   | 0.052 |
| IPI00514212.2 | Mps one binder kinase activator-like 1A                                                | 1              | 1.235     |           | 0.994     | 1.114   | 0.170 |
| IPI00019755.3 | Glutathione transferase omega-1                                                        | 9              | 1.031     | 1.179     | 1.132     | 1.114   | 0.076 |
| IPI00550488.2 | TALDO1 protein                                                                         | 5              | 1.190     | 1.084     | 1.068     | 1.114   | 0.066 |
| IPI00031708.1 | Fumarylacetoacetase                                                                    | 5              | 1.010     | 1.161     | 1.175     | 1.116   | 0.092 |

| IPI number    | Protein name                                                          | Peptide number | forward 1 | reverse 2 | reverse 3 | Average | S.D.  |
|---------------|-----------------------------------------------------------------------|----------------|-----------|-----------|-----------|---------|-------|
| IPI00184330.5 | DNA replication licensing factor MCM2                                 | 10             | 1.266     | 1.013     | 1.068     | 1.116   | 0.133 |
| IPI00010706.1 | Glutathione synthetase                                                | 2              | 1.053     | 1.235     | 1.068     | 1.119   | 0.101 |
| IPI00009368.3 | Sideroflexin-1                                                        | 2              | 1.163     | 1.075     |           | 1.119   | 0.062 |
| IPI00010810.1 | Electron transfer flavoprotein alpha-subunit, mitochondrial precursor | 8              | 1.205     | 1.180     | 0.972     | 1.119   | 0.128 |
| IPI00030154.1 | Proteasome activator complex subunit 1                                | 8              | 1.149     |           | 1.090     | 1.120   | 0.042 |
| IPI00015911.1 | Dihydrolipoyl dehydrogenase, mitochondrial precursor                  | 12             | 1.149     | 1.037     | 1.175     | 1.120   | 0.074 |
| IPI00000230.5 | Tropomyosin 1 alpha chain isoform 2                                   | 2              | 1.149     | 0.940     | 1.271     | 1.120   | 0.167 |
| IPI00293721.3 | Aflatoxin B1 aldehyde reductase member 3                              | 2              |           |           | 1.122     | 1.122   |       |
| IPI00418169.2 | Annexin A2 isoform 1                                                  | 4              | 1.190     | 1.141     | 1.036     | 1.123   | 0.079 |
| IPI00020956.1 | Hepatoma-derived growth factor                                        | 2              | 1.316     | 0.920     | 1.132     | 1.123   | 0.198 |
| IPI00004902.1 | Electron-transfer-flavoprotein, beta polypeptide isoform 1            | 9              | 1.111     | 1.137     | 1.122     | 1.123   | 0.013 |
| IPI00385156.1 | D-myo-inositol-3-phosphate synthase                                   | 2              | 1.111     | 1.106     | 1.154     | 1.124   | 0.026 |
| IPI00217920.4 | Aldehyde dehydrogenase 16 family, member A1                           | 2              |           | 1.124     |           | 1.124   |       |
| IPI00008986.1 | Large neutral amino acids transporter small subunit 1                 | 2              | 1.124     |           |           | 1.124   |       |
| IPI00005158.1 | Lon protease homolog, mitochondrial precursor                         | 8              | 1.124     |           |           | 1.124   |       |
| IPI00027252.6 | Prohibitin-2                                                          | 11             | 1.124     |           |           | 1.124   |       |
| IPI00305152.5 | SEC3IL1 protein                                                       | 1              | 1.124     |           |           | 1.124   |       |
| IPI00017469.1 | Sepiapterin reductase                                                 | 2              | 1.124     |           |           | 1.124   |       |
| IPI00220421.2 | Splice Isoform 2 of Centaurin-delta 2                                 | 2              |           | 1.124     |           | 1.124   |       |
| IPI00001146.1 | U6 snRNA-associated Sm-like protein LSM6                              | 2              | 1.124     |           |           | 1.124   |       |
| IPI00030363.1 | Acetyl-CoA acetyltransferase, mitochondrial precursor                 | 5              | 1.266     | 1.090     | 1.015     | 1.124   | 0.129 |
| IPI00004503.5 | LAMP1 protein                                                         | 3              | 1.190     |           | 1.058     | 1.124   | 0.094 |
| IPI00024871.1 | Core-binding factor, beta subunit isoform 1                           | 1              |           | 1.125     |           | 1.125   |       |
| IPI00014808.1 | Platelet-activating factor acetylhydrolase IB gamma subunit           | 3              | 1.099     | 1.111     | 1.165     | 1.125   | 0.035 |
| IPI00000015.2 | Splicing factor, arginine/serine-rich 4                               | 2              | 1.389     | 0.862     |           | 1.125   | 0.373 |
| IPI00009342.1 | Ras GTPase-activating-like protein IQGAP1                             | 1              | 1.299     | 1.142     | 0.940     | 1.127   | 0.180 |
| IPI00015550.6 | Prothymosin alpha                                                     | 2              | 0.952     |           | 1.303     | 1.128   | 0.248 |
| IPI00410214.1 | Splice Isoform 1 of 3'(2'),5'-bisphosphate nucleotidase               | 2              | 1.220     |           | 1.036     | 1.128   | 0.130 |
| IPI00291005.7 | Malate dehydrogenase, cytoplasmic                                     | 1              | 1.149     | 1.167     | 1.068     | 1.128   | 0.053 |
| IPI00294158.1 | Biliverdin reductase A precursor                                      | 4              | 1.124     | 1.205     | 1.058     | 1.129   | 0.074 |
| IPI00022430.1 | Glyceraldehyde-3-phosphate dehydrogenase, testis-specific             | 2              |           |           | 1.132     | 1.132   |       |

| IPI number     | Protein name                                                                             | Peptide number | forward 1 | reverse 2 | reverse 3 | Average | S.D.  |
|----------------|------------------------------------------------------------------------------------------|----------------|-----------|-----------|-----------|---------|-------|
| IPI00030144.1  | Peptidyl-prolyl cis-trans isomerase                                                      | 3              | 1.075     | 1.041     | 1.282     | 1.133   | 0.130 |
| IPI00220487.3  | ATP synthase, H <sup>+</sup> transporting, mitochondrial F0 complex, subunit d isoform a | 6              | 1.266     | 1.001     |           | 1.133   | 0.187 |
| IPI00017592.1  | Leucine zipper-EF-hand-containing transmembrane protein 1, mitochondrial precursor       | 4              | 1.064     |           | 1.207     | 1.136   | 0.101 |
| IPI00014439.3  | Dihydropteridine reductase                                                               | 2              | 1.149     |           | 1.122     | 1.136   | 0.020 |
| IPI00647400.1  | 68 kDa protein                                                                           | 2              | 1.075     |           | 1.197     | 1.136   | 0.086 |
| IPI00016634.1  | Protein C20orf11                                                                         | 2              | 1.136     |           |           | 1.136   |       |
| IPI00014718.4  | RcDNAJ9 (Fragment)                                                                       | 4              | 1.136     |           |           | 1.136   |       |
| IPI00033022.2  | Splice Isoform 1 of Dynamin-2                                                            | 3              | 1.136     |           |           | 1.136   |       |
| IPI00006684.3  | Splice Isoform 4 of Apoptosis inhibitor 5                                                | 3              | 1.136     |           |           | 1.136   |       |
| IPI00012585.1  | Beta-hexosaminidase beta chain precursor                                                 | 2              | 1.042     |           | 1.239     | 1.140   | 0.140 |
| IPI00008964.3  | Ras-related protein Rab-1B                                                               | 6              |           | 1.139     | 1.143     | 1.141   | 0.003 |
| IPI00744692.1  | Transaldolase                                                                            | 11             | 1.176     | 1.216     | 1.036     | 1.143   | 0.094 |
| IPI00019450.2  | Splice Isoform Long of 60-kDa SS-A/Ro ribonucleoprotein                                  | 3              | 1.282     | 1.220     | 0.929     | 1.144   | 0.188 |
| IPI00010471.3  | Plastin-2                                                                                | 4              | 1.010     | 1.173     | 1.250     | 1.144   | 0.122 |
| IPI00013004.1  | Splice Isoform 1 of Pyridoxal kinase                                                     | 2              | 1.220     | 1.085     | 1.132     | 1.146   | 0.068 |
| IPI00219669.4  | Carbonic anhydrase-related protein                                                       | 8              | 1.235     |           | 1.058     | 1.146   | 0.125 |
| IPI00003406.2  | Drebrin                                                                                  | 2              | 1.266     | 1.031     |           | 1.148   | 0.166 |
| IPI00011285.1  | Calpain-1 catalytic subunit                                                              | 7              | 1.149     |           |           | 1.149   |       |
| IPI00328715.4  | Protein LYRIC                                                                            | 2              | 1.149     |           |           | 1.149   |       |
| IPI00024466.1  | UDP-glucose ceramide glucosyltransferase-like 1 isoform                                  | 2              | 1.149     |           |           | 1.149   |       |
| IPI00016801.1  | Glutamate dehydrogenase 1, mitochondrial precursor                                       | 6              | 1.064     |           | 1.239     | 1.152   | 0.124 |
| IPI00007346.1  | Peptidyl-prolyl cis-trans isomerase H                                                    | 3              |           | 1.152     |           | 1.152   |       |
| IPI00003168.1  | Phosphoribosyl pyrophosphate synthetase-associated protein 2                             | 4              |           | 1.153     |           | 1.153   |       |
| IPI00021828.1  | Cystatin B                                                                               | 5              | 1.149     | 1.169     | 1.143     | 1.154   | 0.013 |
| IPI00329801.11 | Annexin A5                                                                               | 7              | 1.190     | 1.213     | 1.068     | 1.157   | 0.078 |
| IPI00018871.1  | ADP-ribosylation factor-like protein 8B                                                  | 5              |           | 1.198     | 1.122     | 1.160   | 0.054 |
| IPI00456887.2  | PREDICTED: similar to heterogeneous nuclear ribonucleoprotein U                          | 5              | 1.333     | 1.153     | 0.994     | 1.160   | 0.170 |
| IPI00007058.1  | Coronin-1B                                                                               | 3              | 1.075     |           | 1.250     | 1.163   | 0.124 |
| IPI00023530.6  | Cell division protein kinase 5                                                           | 1              | 1.163     |           |           | 1.163   |       |

| IPI number    | Protein name                                                               | Peptide number | forward 1 | reverse 2 | reverse 3 | Average | S.D.  |
|---------------|----------------------------------------------------------------------------|----------------|-----------|-----------|-----------|---------|-------|
| IPI00027485.3 | Eukaryotic translation initiation factor 4E                                | 2              | 1.163     |           |           | 1.163   |       |
| IPI00414384.1 | Hydroxysteroid dehydrogenase-like protein                                  | 2              | 1.163     |           |           | 1.163   |       |
| IPI00002412.1 | Palmitoyl-protein thioesterase 1 precursor                                 | 3              | 1.163     |           |           | 1.163   |       |
| IPI00014177.3 | Septin-2                                                                   | 2              | 1.163     |           |           | 1.163   |       |
| IPI00216348.1 | Splice Isoform 2C of Cytoplasmic dynein 1 intermediate chain 2             | 1              | 1.163     |           |           | 1.163   |       |
| IPI00022597.1 | NEDD8-conjugating enzyme Ubc12                                             | 6              |           | 1.164     |           | 1.164   |       |
| IPI00419258.3 | High mobility group protein B1                                             | 4              | 1.099     | 1.230     |           | 1.164   | 0.092 |
| IPI00007611.1 | ATP synthase O subunit, mitochondrial precursor                            | 8              | 1.031     | 1.053     | 1.410     | 1.165   | 0.213 |
| IPI00012382.2 | U1 small nuclear ribonucleoprotein A                                       | 4              | 1.220     | 1.366     | 0.919     | 1.168   | 0.228 |
| IPI00033600.1 | Yeast sds22 homolog                                                        | 2              | 1.124     |           | 1.218     | 1.171   | 0.067 |
| IPI00218733.5 | Superoxide dismutase                                                       | 5              | 1.235     | 1.231     | 1.047     | 1.171   | 0.107 |
| IPI00168479.2 | Apolipoprotein A-I binding protein precursor                               | 2              | 1.087     | 1.106     | 1.325     | 1.172   | 0.132 |
| IPI00024989.7 | Protein-L-isoaspartate (D-aspartate) O-methyltransferase                   | 7              | 1.250     | 1.107     | 1.165     | 1.174   | 0.072 |
| IPI00027350.2 | Peroxiredoxin-2                                                            | 1              | 1.087     | 1.196     | 1.239     | 1.174   | 0.078 |
| IPI00011268.2 | RNA binding protein (Fragment)                                             | 3              |           | 1.174     |           | 1.174   |       |
| IPI00555956.1 | Proteasome subunit beta type 4 precursor                                   | 5              | 1.587     | 0.931     | 1.004     | 1.174   | 0.359 |
| IPI00007019.1 | Peptidyl-prolyl cis-trans isomerase-like 1                                 | 1              |           | 1.175     |           | 1.175   |       |
| IPI00008982.1 | Splice Isoform Long of Delta 1-pyrroline-5-carboxylate synthetase          | 2              | 1.124     | 1.226     |           | 1.175   | 0.072 |
| IPI00018452.1 | Copine-1                                                                   | 2              | 1.250     |           | 1.100     | 1.175   | 0.106 |
| IPI00023529.1 | Cell division protein kinase 6                                             | 4              |           |           | 1.175     | 1.175   |       |
| IPI00299608.3 | Splice Isoform 1 of 26S proteasome non-ATPase regulatory subunit 1         | 4              | 1.587     | 1.020     | 0.919     | 1.175   | 0.360 |
| IPI00298994.5 | Talin-1                                                                    | 37             | 1.176     | 1.209     | 1.143     | 1.176   | 0.033 |
| IPI00001960.3 | Chloride intracellular channel protein 4                                   | 6              | 1.176     |           |           | 1.176   |       |
| IPI00010402.2 | Hypothetical protein                                                       | 2              |           | 1.176     |           | 1.176   |       |
| IPI00294619.1 | Protein TFG                                                                | 2              | 1.176     |           |           | 1.176   |       |
| IPI00179589.2 | Myotrophin                                                                 | 4              | 1.163     | 1.183     | 1.186     | 1.177   | 0.012 |
| IPI00005668.4 | Aldo-keto reductase family 1 member C2                                     | 3              | 1.163     | 1.226     | 1.143     | 1.177   | 0.044 |
| IPI00300567.1 | Splice Isoform 1 of 3,2-trans-enoyl-CoA isomerase, mitochondrial precursor | 6              | 1.235     | 1.295     | 1.004     | 1.178   | 0.154 |
| IPI00301109.3 | Splice Isoform 1 of Inorganic pyrophosphatase 2, mitochondrial             | 4              | 1.449     |           | 0.908     | 1.179   | 0.383 |

| IPI number    | Protein name                                                                            | Peptide number | forward 1 | reverse 2 | reverse 3 | Average | S.D.  |
|---------------|-----------------------------------------------------------------------------------------|----------------|-----------|-----------|-----------|---------|-------|
|               | precursor                                                                               |                |           |           |           |         |       |
| IPI00216699.1 | Splice Isoform 2 of Unc-112-related protein 2                                           | 3              | 1.250     | 1.111     |           | 1.181   | 0.098 |
| IPI00645078.1 | Ubiquitin-activating enzyme E1                                                          | 5              | 1.124     | 1.178     | 1.250     | 1.184   | 0.063 |
| IPI00002745.1 | Cathepsin Z precursor                                                                   | 2              | 1.429     |           | 0.940     | 1.184   | 0.345 |
| IPI00292140.4 | Caspase-3 precursor                                                                     | 2              |           |           | 1.186     | 1.186   |       |
| IPI00479997.3 | Stathmin                                                                                | 14             | 1.220     | 1.132     | 1.207     | 1.186   | 0.047 |
| IPI00002048.2 | PREDICTED: aldo-keto reductase, truncated                                               | 2              | 1.124     |           | 1.250     | 1.187   | 0.089 |
| IPI00294578.1 | Splice Isoform 1 of Protein-glutamine gamma-glutamyltransferase 2                       | 2              | 1.149     | 1.538     | 0.876     | 1.188   | 0.333 |
| IPI00010120.4 | C-terminal-binding protein 2                                                            | 2              | 1.190     |           |           | 1.190   |       |
| IPI00183503.7 | Novel protein                                                                           | 3              | 1.190     |           |           | 1.190   |       |
| IPI00025874.2 | Dolichyl-diphosphooligosaccharide--protein glycosyltransferase 67 kDa subunit precursor | 3              | 0.990     | 1.021     | 1.571     | 1.194   | 0.326 |
| IPI00642211.3 | Aminopeptidase B                                                                        | 1              | 1.266     | 1.152     | 1.165     | 1.194   | 0.062 |
| IPI00641319.1 | Ubiquitin-activating enzyme E1                                                          | 2              | 1.149     |           | 1.239     | 1.194   | 0.064 |
| IPI00026119.6 | Ubiquitin-activating enzyme E1                                                          | 6              | 1.149     | 1.165     | 1.271     | 1.195   | 0.066 |
| IPI00030357.5 | Dihydrofolate reductase                                                                 | 2              |           | 1.061     | 1.335     | 1.198   | 0.194 |
| IPI00465436.3 | Catalase                                                                                | 8              | 1.205     | 1.263     | 1.132     | 1.200   | 0.066 |
| IPI00107531.1 | Splice Isoform 3 of DNA repair protein RAD50                                            | 4              | 1.471     |           | 0.934     | 1.202   | 0.379 |
| IPI00552452.1 | Ubiquitin-activating enzyme E1                                                          | 2              | 1.235     | 1.190     | 1.186     | 1.204   | 0.027 |
| IPI00329742.1 | Fumarylacetoacetate hydrolase domain containing 2A                                      | 2              | 1.205     |           |           | 1.205   |       |
| IPI00297635.5 | SA hypertension-associated homolog isoform 1                                            | 2              | 1.205     |           |           | 1.205   |       |
| IPI00300026.5 | Sulfotransferase 1A1                                                                    | 2              | 1.205     |           |           | 1.205   |       |
| IPI00297477.3 | U2 small nuclear ribonucleoprotein A'                                                   | 4              | 1.205     |           |           | 1.205   |       |
| IPI00218667.2 | Stathmin-2                                                                              | 3              | 1.176     | 1.211     | 1.229     | 1.205   | 0.027 |
| IPI00007001.1 | 39S ribosomal protein L11, mitochondrial precursor                                      | 2              |           | 1.206     |           | 1.206   |       |
| IPI00604707.3 | Dihydrolipoamide S-acetyltransferase (Fragment)                                         | 2              | 1.205     |           | 1.207     | 1.206   | 0.002 |
| IPI00217143.2 | SDHA protein                                                                            | 2              | 1.149     | 1.361     | 1.132     | 1.214   | 0.127 |
| IPI00060181.1 | EF-hand domain-containing protein 2                                                     | 3              | 1.449     |           | 0.983     | 1.216   | 0.330 |
| IPI00008454.1 | DnaJ homolog subfamily B member 11 precursor                                            | 2              | 1.220     |           |           | 1.220   |       |
| IPI00013774.1 | Histone deacetylase 1                                                                   | 2              | 1.220     |           |           | 1.220   |       |
| IPI00465373.1 | Kynurenine aminotransferase III isoform 1                                               | 2              | 1.220     |           |           | 1.220   |       |

| IPI number        | Protein name                                                                            | Peptide number | forward 1 | reverse 2 | reverse 3 | Average | S.D.  |
|-------------------|-----------------------------------------------------------------------------------------|----------------|-----------|-----------|-----------|---------|-------|
| IPI00017256.5     | Ras suppressor protein 1                                                                | 2              | 1.220     |           |           | 1.220   |       |
| IPI00032134.1     | Serpin B8                                                                               | 2              | 1.220     |           |           | 1.220   |       |
| IPI00023785.5     | Splice Isoform 1 of Probable ATP-dependent RNA helicase                                 | 2              | 1.220     |           |           | 1.220   |       |
| IPI00306825.3     | Splice Isoform 1 of Tumor protein D54                                                   | 2              | 1.220     |           |           | 1.220   |       |
| IPI00296337.2     | Splice Isoform 1 of DNA-dependent protein kinase catalytic subunit                      | 16             | 1.299     | 1.152     |           | 1.225   | 0.104 |
| IPI00174852.4     | TRF-proximal protein homolog                                                            | 2              |           | 1.227     |           | 1.227   |       |
| IPI00021997.1     | CREG1 protein precursor                                                                 | 2              | 1.333     |           | 1.122     | 1.228   | 0.150 |
| IPI00157820.2     | Splice Isoform 2 of Thioredoxin reductase 2, mitochondrial precursor                    | 2              |           |           | 1.229     | 1.229   |       |
| IPI00374732.3     | PREDICTED: similar to peptidylprolyl isomerase A isoform 1                              | 2              | 1.126     | 1.430     | 1.132     | 1.229   | 0.174 |
| IPI00181135.4     | Splice Isoform B of Branched-chain-amino-acid aminotransferase, mitochondrial precursor | 1              | 1.493     |           | 0.972     | 1.232   | 0.368 |
| IPI00014198.2     | Exosome complex exonuclease RRP42                                                       | 2              | 1.235     |           |           | 1.235   |       |
| IPI00465006.1     | Hypothetical protein DKFZp686D19113                                                     | 2              | 1.235     |           |           | 1.235   |       |
| IPI00017412.1     | Splice Isoform 1 of Activator 1 40 kDa subunit                                          | 2              | 1.235     |           |           | 1.235   |       |
| IPI00025156.4     | Splice Isoform 1 of STIP1 homology and U box-containing protein 1                       | 3              | 1.235     |           |           | 1.235   |       |
| IPI00005979.2     | Splice Isoform 1 of Translation initiation factor eIF-2B                                | 3              | 1.235     |           |           | 1.235   |       |
| IPI00305978.4     | Aflatoxin B1 aldehyde reductase member 2                                                | 3              | 1.429     |           | 1.047     | 1.238   | 0.270 |
| REV_20262_Protein | no description                                                                          | 2              |           |           | 1.239     | 1.239   |       |
| IPI00024913.1     | Splice Isoform Long of ES1 protein homolog, mitochondrial precursor                     | 5              | 1.220     |           | 1.261     | 1.240   | 0.029 |
| IPI00007926.1     | c-Myc-responsive protein Rcl                                                            | 3              | 1.190     | 1.302     |           | 1.246   | 0.079 |
| IPI00219299.2     | Talin-2                                                                                 | 5              | 1.220     | 1.258     | 1.271     | 1.250   | 0.027 |
| IPI00220503.9     | Dynactin 2                                                                              | 4              | 1.250     |           |           | 1.250   |       |
| IPI00005040.1     | Medium-chain specific acyl-CoA dehydrogenase, mitochondrial precursor                   | 1              | 1.064     | 1.163     | 1.528     | 1.251   | 0.244 |
| IPI00029133.4     | ATP synthase B chain, mitochondrial precursor                                           | 4              | 1.515     | 0.997     |           | 1.256   | 0.367 |
| IPI00010860.1     | Splice Isoform p27-L of 26S proteasome non-ATPase regulatory subunit 9                  | 2              | 1.316     | 1.172     | 1.282     | 1.257   | 0.075 |
| IPI00300086.3     | Nicotinate-nucleotide pyrophosphorylase                                                 | 10             | 1.235     |           | 1.282     | 1.258   | 0.034 |
| IPI00010865.1     | Casein kinase II subunit beta                                                           | 1              |           | 1.266     |           | 1.266   |       |
| IPI00017283.2     | Isoleucyl-tRNA synthetase, mitochondrial precursor                                      | 6              | 1.266     |           |           | 1.266   |       |



| IPI number        | Protein name                                                              | Peptide number | forward 1 | reverse 2 | reverse 3 | Average | S.D.  |
|-------------------|---------------------------------------------------------------------------|----------------|-----------|-----------|-----------|---------|-------|
| IPI00303568.3     | Prostaglandin E synthase 2                                                | 1              | 1.266     |           |           | 1.266   |       |
| IPI00014587.1     | Splice Isoform Brain of Clathrin light chain A                            | 1              | 1.266     |           |           | 1.266   |       |
| IPI00026516.1     | Succinyl-CoA:3-ketoacid-coenzyme A transferase 1, mitochondrial precursor | 2              |           | 1.190     | 1.346     | 1.268   | 0.110 |
| IPI00171798.1     | Metastasis-associated protein MTA2                                        | 4              | 1.111     | 1.427     |           | 1.269   | 0.223 |
| IPI00216319.2     | 14-3-3 protein eta                                                        | 3              | 1.250     | 1.326     | 1.239     | 1.272   | 0.047 |
| IPI00218918.4     | Annexin A1                                                                | 31             | 1.235     | 1.209     | 1.389     | 1.278   | 0.097 |
| IPI00427330.2     | Shwachman-Bodian-Diamond syndrome protein                                 | 2              | 1.613     | 0.943     |           | 1.278   | 0.473 |
| IPI00219575.5     | Bleomycin hydrolase                                                       | 3              |           |           | 1.282     | 1.282   |       |
| IPI00028109.1     | Dpy-30-like protein                                                       | 2              | 1.282     |           |           | 1.282   |       |
| REV_20581_Protein | no description                                                            | 2              |           |           | 1.282     | 1.282   |       |
| IPI00018246.4     | Splice Isoform 1 of Hexokinase-1                                          | 3              | 1.282     |           |           | 1.282   |       |
| IPI00169400.1     | Splice Isoform 1 of Mitochondrial 28S ribosomal protein S5                | 2              |           | 1.282     |           | 1.282   |       |
| IPI00010271.3     | Splice Isoform A of Ras-related C3 botulinum toxin substrate 1 precursor  | 2              |           | 1.290     |           | 1.290   |       |
| IPI00448095.3     | L-xylulose reductase                                                      | 2              |           | 1.290     |           | 1.290   |       |
| IPI00220740.1     | Splice Isoform 2 of Nucleophosmin                                         | 36             | 1.190     | 1.041     | 1.656     | 1.296   | 0.321 |
| IPI00031107.1     | HSDL2 protein                                                             | 4              | 1.299     |           |           | 1.299   |       |
| IPI00301994.5     | Hypothetical protein DKFZp434N062                                         | 3              | 1.299     |           |           | 1.299   |       |
| IPI00009747.1     | Lanosterol synthase                                                       | 2              | 1.299     |           |           | 1.299   |       |
| IPI00465044.2     | Protein RCC2                                                              | 1              | 1.299     |           |           | 1.299   |       |
| IPI00104050.3     | Thyroid hormone receptor-associated protein 3                             | 2              | 1.351     | 1.250     |           | 1.301   | 0.072 |
| IPI00029997.1     | 6-phosphogluconolactonase                                                 | 2              | 0.901     | 1.193     | 1.816     | 1.303   | 0.468 |
| IPI00003031.1     | Hypothetical protein FLJ23469                                             | 2              |           |           | 1.303     | 1.303   |       |
| IPI00025318.1     | SH3 domain-binding glutamic acid-rich-like protein                        | 3              |           | 1.307     |           | 1.307   |       |
| IPI00019502.2     | Myosin-9                                                                  | 20             | 1.111     | 1.043     | 1.774     | 1.309   | 0.403 |
| IPI00414320.1     | Annexin A11                                                               | 2              | 1.266     | 1.563     | 1.111     | 1.313   | 0.229 |
| IPI00001352.1     | 21 kDa protein                                                            | 3              |           | 1.315     |           | 1.315   |       |
| IPI00219841.6     | DNA ligase 1                                                              | 2              | 1.316     |           |           | 1.316   |       |
| IPI00181231.9     | Hypothetical protein LOC55037                                             | 2              | 1.316     |           |           | 1.316   |       |
| IPI00186711.3     | Plectin 1 isoform 6                                                       | 2              | 1.316     |           |           | 1.316   |       |

| IPI number    | Protein name                                                                                                       | Peptide number | forward 1 | reverse 2 | reverse 3 | Average | S.D.  |
|---------------|--------------------------------------------------------------------------------------------------------------------|----------------|-----------|-----------|-----------|---------|-------|
| IPI00171412.1 | Splice Isoform 1 of Sulfatase-modifying factor 2 precursor                                                         | 3              | 1.316     |           |           | 1.316   |       |
| IPI00003482.1 | 2,4-dienoyl-CoA reductase, mitochondrial precursor                                                                 | 7              | 1.163     | 1.188     | 1.603     | 1.318   | 0.247 |
| IPI00384992.6 | Myosin light polypeptide 4                                                                                         | 2              | 1.282     | 1.220     | 1.453     | 1.318   | 0.121 |
| IPI00011229.1 | Cathepsin D precursor                                                                                              | 3              | 1.429     | 1.311     | 1.218     | 1.319   | 0.106 |
| IPI00029733.1 | Aldo-keto reductase family 1 member C1                                                                             | 2              | 1.429     | 1.471     | 1.079     | 1.326   | 0.215 |
| IPI00018342.5 | Adenylate kinase isoenzyme 1                                                                                       | 3              | 1.429     |           | 1.229     | 1.329   | 0.141 |
| IPI00219910.1 | Flavin reductase                                                                                                   | 18             | 1.316     | 1.411     | 1.261     | 1.329   | 0.076 |
| IPI00021338.1 | Dihydrolipoyllysine-residue acetyltransferase component of pyruvate dehydrogenase complex, mitochondrial precursor | 2              | 1.389     | 1.224     | 1.378     | 1.330   | 0.092 |
| IPI00020530.1 | Thioesterase superfamily member 2                                                                                  | 4              |           | 1.455     | 1.206     | 1.331   | 0.176 |
| IPI00010219.1 | Spindle pole body component 25                                                                                     | 3              | 1.333     |           |           | 1.333   |       |
| IPI00013475.1 | Tubulin, beta 2                                                                                                    | 4              | 1.333     |           |           | 1.333   |       |
| IPI00003925.5 | Splice Isoform 1 of Pyruvate dehydrogenase E1 component subunit beta, mitochondrial precursor                      | 4              | 1.471     |           | 1.207     | 1.339   | 0.186 |
| IPI00011416.2 | Enoyl Coenzyme A hydratase 1, peroxisoma                                                                           | 3              | 1.299     | 1.523     | 1.197     | 1.339   | 0.167 |
| IPI00011107.2 | Isocitrate dehydrogenase [NADP], mitochondrial precursor                                                           | 5              | 1.299     | 1.187     | 1.538     | 1.342   | 0.179 |
| IPI00024915.2 | Peroxiredoxin-5, mitochondrial precursor                                                                           | 2              | 1.190     | 1.355     | 1.485     | 1.344   | 0.148 |
| IPI00013860.3 | 3-hydroxyisobutyrate dehydrogenase, mitochondrial precursor                                                        | 2              | 1.299     | 1.471     | 1.271     | 1.347   | 0.108 |
| IPI00002459.4 | Annexin VI isoform 2                                                                                               | 5              |           |           | 1.357     | 1.357   |       |
| IPI00301489.3 | Uroporphyrinogen decarboxylase                                                                                     | 6              | 1.266     | 1.458     | 1.357     | 1.360   | 0.096 |
| IPI00335168.8 | Myosin, light polypeptide 6, alkali, smooth muscle and non-muscle isoform 1                                        | 2              | 1.136     |           | 1.592     | 1.364   | 0.322 |
| IPI00219097.3 | High mobility group protein B2                                                                                     | 2              | 1.429     | 1.322     |           | 1.375   | 0.075 |
| IPI00022334.1 | Ornithine aminotransferase, mitochondrial precursor                                                                | 4              | 1.351     | 1.414     | 1.389     | 1.385   | 0.031 |
| IPI00304435.3 | Protein NipSnap1                                                                                                   | 3              | 1.389     |           |           | 1.389   |       |
| IPI00017305.2 | Ribosomal protein S6 kinase alpha-1                                                                                | 3              | 1.389     |           |           | 1.389   |       |
| IPI00028031.2 | Splice Isoform 1 of Very-long-chain specific acyl-CoA dehydrogenase, mitochondrial precursor                       | 3              | 1.235     | 1.817     | 1.132     | 1.395   | 0.369 |
| IPI00061507.1 | Hypothetical protein C11orf54                                                                                      | 2              |           |           | 1.400     | 1.400   |       |
| IPI00220271.2 | Alcohol dehydrogenase                                                                                              | 8              | 1.149     | 1.581     | 1.471     | 1.400   | 0.224 |
| IPI00017184.2 | EH-domain-containing protein 1                                                                                     | 2              | 1.389     |           | 1.421     | 1.405   | 0.023 |
| IPI00179700.3 | High mobility group AT-hook 1 isoform a                                                                            | 2              | 1.408     |           |           | 1.408   |       |

| IPI number    | Protein name                                                                  | Peptide number | forward 1 | reverse 2 | reverse 3 | Average | S.D.  |
|---------------|-------------------------------------------------------------------------------|----------------|-----------|-----------|-----------|---------|-------|
| IPI00218235.4 | Dehydrogenase/reductase (SDR family) member 2 isoform 2                       |                |           | 1.416     |           | 1.416   |       |
| IPI00060627.1 | Hypothetical protein LOC115098                                                | 2              | 1.429     |           |           | 1.429   |       |
| IPI00328257.4 | Splice Isoform A of AP-1 complex subunit beta-1                               | 3              | 1.429     |           |           | 1.429   |       |
| IPI00021389.1 | Copper chaperone for superoxide dismutase                                     | 2              | 1.449     | 1.411     |           | 1.430   | 0.027 |
| IPI00031681.1 | Cell division protein kinase 2                                                | 1              | 1.449     |           |           | 1.449   |       |
| IPI00177817.4 | Splice Isoform SERCA2A of Sarcoplasmic/endoplasmic reticulum calcium ATPase 2 | 2              | 1.449     |           |           | 1.449   |       |
| IPI00179713.5 | Insulin-like growth factor 2 mRNA binding protein 2                           | 2              | 1.471     |           |           | 1.471   |       |
| IPI00059762.5 | Lysophospholipase-like 1                                                      | 1              | 1.471     |           |           | 1.471   |       |
| IPI00011494.3 | Methyltransferase-like protein 1 isoform c                                    | 2              | 1.471     |           |           | 1.471   |       |
| IPI00294380.4 | Phosphoenolpyruvate carboxykinase (GTP) family protein                        | 3              | 1.471     |           |           | 1.471   |       |
| IPI00291930.5 | Splice Isoform 1 of Epsin-4                                                   | 1              | 1.471     |           |           | 1.471   |       |
| IPI00216308.4 | Voltage-dependent anion-selective channel protein 1                           | 3              | 1.471     |           |           | 1.471   |       |
| IPI00155601.1 | Protein LRP16                                                                 | 4              | 1.818     |           | 1.168     | 1.493   | 0.460 |
| IPI00216125.6 | SRP9 protein                                                                  | 2              |           | 1.495     |           | 1.495   |       |
| IPI00020127.1 | Replication protein A 70 kDa DNA-binding subunit                              | 2              |           |           | 1.496     | 1.496   |       |
| IPI00156689.3 | Synaptic vesicle membrane protein VAT-1 homolog                               | 6              | 1.538     | 1.573     | 1.390     | 1.500   | 0.097 |
| IPI00295741.4 | Cathepsin B precursor                                                         | 6              | 1.587     | 1.672     | 1.250     | 1.503   | 0.223 |
| IPI00217357.2 | Cell division cycle and apoptosis regulator protein 1                         | 2              | 1.429     |           | 1.586     | 1.507   | 0.111 |
| IPI00027776.6 | Ferrochelatase, mitochondrial precursor                                       | 5              | 1.754     | 1.532     | 1.324     | 1.537   | 0.215 |
| IPI00024145.1 | Splice Isoform 1 of Voltage-dependent anion-selective channel 2               | 4              | 1.587     |           | 1.545     | 1.566   | 0.030 |
| IPI00220835.6 | Protein transport protein Sec61 beta subunit                                  | 1              |           | 1.587     | 1.552     | 1.570   | 0.025 |
| IPI00218568.6 | Pterin-4-alpha-carbinolamine dehydratase                                      | 1              | 1.470     | 1.587     | 1.685     | 1.581   | 0.108 |
| IPI00021924.1 | Histone H1x                                                                   | 4              | 1.786     | 1.385     | 1.592     | 1.588   | 0.200 |
| IPI00642144.2 | Aldehyde dehydrogenase 1 family, member A1                                    | 2              | 1.587     | 1.832     | 1.357     | 1.592   | 0.238 |
| IPI00744503.1 | 17 kDa protein                                                                | 1              | 1.721     |           | 1.474     | 1.598   | 0.174 |
| IPI00093057.6 | Coproporphyrinogen III oxidase, mitochondrial precursor                       | 5              | 1.639     | 1.907     | 1.282     | 1.609   | 0.314 |
| IPI00028160.1 | Splice Isoform 1 of Porphobilinogen deaminase                                 | 8              | 1.887     | 1.850     | 1.752     | 1.830   | 0.070 |
| IPI00337541.3 | NAD(P) transhydrogenase, mitochondrial precursor                              | 1              | 1.887     |           | 1.923     | 1.905   | 0.026 |
| IPI00219038.8 | Histone H3.3                                                                  | 1              | 2.083     | 2.343     | 1.907     | 2.111   | 0.219 |

| IPI number    | Protein name                   | Peptide number | forward 1 | reverse 2 | reverse 3 | Average | S.D.  |
|---------------|--------------------------------|----------------|-----------|-----------|-----------|---------|-------|
| IPI00220706.9 | Hemoglobin gamma-1 subunit     | 4              | 2.000     | 3.125     | 1.506     | 2.210   | 0.830 |
| IPI00217465.4 | Histone H1.2                   | 10             | 2.632     | 1.728     | 2.404     | 2.255   | 0.470 |
| IPI00030809.1 | Gamma-G globin                 | 6              | 2.128     | 2.971     | 1.934     | 2.344   | 0.552 |
| IPI00003935.5 | Histone H2B                    | 7              | 3.030     | 2.370     | 1.641     | 2.347   | 0.695 |
| IPI00410714.4 | Hemoglobin alpha subunit       | 6              | 2.222     | 3.171     | 1.677     | 2.357   | 0.756 |
| IPI00449049.4 | Poly [ADP-ribose] polymerase 1 | 7              | 2.632     | 2.703     | 1.941     | 2.425   | 0.421 |
| IPI00171611.5 | Histone H3.1                   | 4              | 3.030     | 2.575     | 2.218     | 2.608   | 0.407 |
| IPI00217471.2 | Hemoglobin epsilon subunit     | 5              | 2.174     | 3.613     | 2.447     | 2.745   | 0.765 |
| IPI00026272.1 | Histone H2A                    | 4              | 3.333     | 1.975     | 2.938     | 2.749   | 0.699 |
| IPI00554676.1 | Hemoglobin gamma-2 subunit     | 1              | 2.778     | 3.448     | 2.286     | 2.837   | 0.583 |
| IPI00217473.4 | Hemoglobin zeta subunit        | 12             | 2.778     | 4.311     | 1.987     | 3.025   | 1.182 |
| IPI00453473.5 | Histone H4                     | 8              | 4.000     | 2.690     | 2.496     | 3.062   | 0.818 |

**Table S2.** Detailed quantification results for proteins with substantial changes.

| <b>IPI number</b> | <b>Protein name</b>                                                                                                                                                               | <b>Peptide number</b> | <b>Forward 1</b> | <b>Reverse 2</b> | <b>Reverse 3</b> | <b>Average</b> |
|-------------------|-----------------------------------------------------------------------------------------------------------------------------------------------------------------------------------|-----------------------|------------------|------------------|------------------|----------------|
| IPI00032561.1     | Calcium-binding protein 39<br>R.DLKRPAQQE.A<br>K.VFVANPNKTQPILDILLK.N                                                                                                             | 2                     | 0.353            |                  | 0.438            | 0.396          |
| IPI00002214.1     | Importin alpha-2 subunit<br>R.QDQIQVNVNHGLVPFLVSVLSKADFK.T<br>K.TGVVPQLVKLLGASELPIVTPALR.A<br>K.LLGASELPIVTPALR.A<br>K.TGVVPQLVK.L<br>R.NKNPAPPIDAVEQILPTLVR.L<br>R.EKQPPIDNIIR.A | 6                     | 0.505            | 0.535            | 0.524            | 0.521          |
| IPI00221108.4     | Thymidylate synthase<br>-.PVAGSELPR.R<br>-.PVAGSELPRRPLPPAAQER.D                                                                                                                  | 2                     | 0.485            | 0.513            | 0.569            | 0.522          |
| IPI00011631.5     | Centromere/kinetochore protein zw10 homolog<br>K.AMGTLLNTAISEVIGK.I                                                                                                               | 1                     |                  | 0.493            | 0.609            | 0.493          |
| IPI00010349.1     | Alkyldihydroxyacetonephosphate synthase,<br>peroxisomal precursor<br>K.NIYGNIEDLVVHIK.M<br>K.GFDPNQLSVATLLFEGDREK.V                                                               | 2                     | 0.504            | 0.642            | 0.524            | 0.557          |
| IPI00013068.1     | Eukaryotic translation initiation factor 3 subunit 6<br>K.NLYSDDIPHALR.E<br>R.TTVVAQLKQLQAETEPIVK.M                                                                               | 2                     | 0.685            |                  | 0.450            | 0.567          |
| IPI00005045.1     | ATP-binding cassette sub-family F member 2<br>R.VALVGPNGAGK.S<br>R.ILHGLGFTPAMQR.K                                                                                                | 5                     | 0.568            | 0.534            | 0.605            | 0.569          |

| <b>IPI number</b> | <b>Protein name</b>                                                                                                                         | <b>Peptide number</b> | <b>Forward</b> | <b>Reverse 1</b> | <b>Reverse 2</b> | <b>Reverse 3</b> | <b>Average</b> |
|-------------------|---------------------------------------------------------------------------------------------------------------------------------------------|-----------------------|----------------|------------------|------------------|------------------|----------------|
|                   | K.SMLLSAIGKR.E<br>K.LLTGELLPTDGMIR.K<br>R.EVPIPEHIDIYHLTR.E                                                                                 |                       |                |                  |                  |                  |                |
| IPI00026182.4     | F-actin capping protein alpha-2 subunit<br>K.FIIHAPPGEFNEVFNDVR.L<br>K.FTITPSTTQVVGILK.I                                                    | 2                     | 0.508          |                  |                  | 0.652            | 0.580          |
| IPI00218505.6     | Protein FAM112B<br>K.LATCPFNAR.H<br>K.SLPYVLPWKNNNGNA.Q                                                                                     | 2                     | 0.611          | 0.595            |                  | 0.550            | 0.585          |
| IPI00337602.4     | 56 kDa protein<br>R.ESVLTATSILNNPIVK.A                                                                                                      | 1                     |                |                  | 0.651            | 0.524            | 0.588          |
| IPI00218292.2     | Splice Isoform Short of Ubiquitin fusion degradation protein<br>R.LNITYPMLFK.L<br>R.AFSGSGNRLDGK.K<br>R.FVAFSGEGQSLR.K<br>K.IIMPPSALDQLSR.L | 4                     | 0.758          |                  |                  | 0.438            | 0.598          |
| IPI00306043.1     | Splice Isoform 1 of YTH domain protein 2<br>K.LGSTEVASNVPK.V                                                                                | 1                     | 0.588          | 0.611            |                  | 0.602            | 0.600          |
| IPI00009010.3     | UPF0315 protein AD-001<br>R.ICPVEFNPNFVAR.M<br>R.GIPNMLLSEEETE.S                                                                            | 2                     | 0.660          | 0.549            |                  | 0.609            | 0.606          |
| IPI00743544.1     | 15 kDa protein<br>K.LYTLVTYVTVTTFK.N                                                                                                        | 1                     |                |                  | 0.624            | 0.591            | 0.607          |
| IPI00220113.1     | Splice Isoform 2 of Microtubule-associated protein 4                                                                                        | 11                    | 0.568          | 0.629            |                  | 0.630            | 0.609          |

| <b>IPI number</b> | <b>Protein name</b>                                                                                                                                                                                                                                         | <b>Peptide number</b> | <b>Forward 1</b> | <b>Reverse 2</b> | <b>Reverse 3</b> | <b>Average</b> |
|-------------------|-------------------------------------------------------------------------------------------------------------------------------------------------------------------------------------------------------------------------------------------------------------|-----------------------|------------------|------------------|------------------|----------------|
|                   | K.NVVLPTEVEVAPAKDVTLLKETER.A<br>K.TTTLSGTAPAAGVVPSRVK.A<br>R.LATNTSAPDLKNVR.S<br>K.KPMSLASGLVPAAPPK.R<br>K.VGSLDNVGHLPAGGAVK.T<br>R.ASPSKPASAPASR.S<br>K.TTTAAAVASTGPSSR.S<br>R.SPSTLLPK.K<br>K.KPTSAKPSSTTPR.L<br>R.LATNTSAPDLK.N<br>K.TEAAATTRKPESNAVTK.T |                       |                  |                  |                  |                |
| IPI00183294.3     | Nuclear pore complex protein Nup214<br>R.TPSIQSLLPHAAPFAK.S<br>K.TPHPVLTPVAANQAK.Q<br>K.QGSLINSLKPSGPTPASGQLSSGDKASGTAK.I<br>K.ASSTSLTSTQPTK.T<br>K.TSGVPSGFNFTAPPVLGK.H<br>R.IFDSPEELPKER.S<br>K.AAPGPGPSTFSFVPPSK.A                                       | 7                     | 0.439            | 0.743            | 0.650            | 0.610          |
| IPI00221035.3     | Splice Isoform 1 of Transcription factor BTF3<br>K.VQASLAANTFTITGHAETK.Q<br>K.QLTEMLPSILNQLGADSLTSLR.R<br>K.QLTEMLPSILNQLGADSLTSLRR.L                                                                                                                       | 3                     | 0.559            | 0.702            | 0.577            | 0.612          |
| IPI00291669.3     | Ubiquitin-like domain containing CTD phosphatase 1<br>K.TLTGVLPER.Q<br>R.GLIDVKPLGVIWGK.F                                                                                                                                                                   | 2                     | 0.699            | 0.568            | 0.588            | 0.618          |
| IPI00305166.1     | Succinate dehydrogenase [ubiquinone] flavoprotein subunit, mitochondrial precursor<br>R.GVIALCIEDGSIHR.I                                                                                                                                                    | 1                     |                  | 0.590            | 0.652            | 0.621          |

| <b>IPI number</b> | <b>Protein name</b>                                                                                                                                                                                             | <b>Peptide number</b> | <b>Forward 1</b> | <b>Reverse 2</b> | <b>Reverse 3</b> | <b>Average</b> |
|-------------------|-----------------------------------------------------------------------------------------------------------------------------------------------------------------------------------------------------------------|-----------------------|------------------|------------------|------------------|----------------|
| IPI00329625.2     | Cell cycle progression 2 protein isoform 1<br>K.LLGSLYALGIPK.A<br>K.ELQSVEQEV.R.W                                                                                                                               | 2                     | 0.794            |                  | 0.449            | 0.621          |
| IPI00021266.1     | 60S ribosomal protein L23a<br>R.LAPDYDALDVANK.I<br>R.LAPDYDALDVANKIGI.I<br>K.KEAPAPPKAEAK.A<br>K.EAPAPPKAEAK.A<br>R.TSPTFR.R<br>K.KLYDIDVAK.V<br>K.LYDIDVAKVNTLIRPDGEK.K<br>K.VNTLIRPDGEK.K<br>K.VNTLIRPDGEKK.A | 9                     | 0.613            | 0.764            | 0.510            | 0.629          |
| IPI00009057.1     | Splice Isoform A of Ras-GTPase-activating protein-binding protein 2<br>R.VEAKPEVQSQPPR.V<br>K.GVGGKLPNFGFVVFDDSEPVQR.I<br>R.VEAKPEVQSQPPRVR.E<br>K.VLSLNFSECHTK.I<br>R.VEAKPEVQSQPPRVR.E<br>R.ILIAKPIMFR.G      | 6                     | 0.629            | 0.675            | 0.589            | 0.631          |
| IPI00176692.7     | PREDICTED: similar to Heterogeneous nuclear ribonucleoprotein A1<br>R.EDSQRPGAHLTVK.K<br>R.GFAFVTFDDHDSVDKIVIQK.Y<br>R.AVSREDSQRPGAHLTVK.K<br>R.GFAFVTFDDHDSVDK.I                                               | 4                     | 0.775            | 0.773            | 0.353            | 0.634          |
| IPI00029266.1     | Small nuclear ribonucleoprotein E<br>K.VMVQPINLIFR.Y                                                                                                                                                            | 2                     | 0.368            | 0.763            | 0.780            | 0.637          |



| <b>IPI number</b> | <b>Protein name</b>                                                                                                                                                                                                                                                                                                                     | <b>Peptide number</b> | <b>Forward 1</b> | <b>Reverse 2</b> | <b>Reverse 3</b> | <b>Average</b> |
|-------------------|-----------------------------------------------------------------------------------------------------------------------------------------------------------------------------------------------------------------------------------------------------------------------------------------------------------------------------------------|-----------------------|------------------|------------------|------------------|----------------|
|                   | R.IMLKGDNITLLQSVS.N                                                                                                                                                                                                                                                                                                                     |                       |                  |                  |                  |                |
| IPI00017895.2     | Splice Isoform 1 of Glycerol-3-phosphate dehydrogenase, mitochondrial precursor<br>R.VIFFLPWK.M<br>R.LAFLNVQAAEEALPR.I<br>R.YGAATANYMEVVSLK.K                                                                                                                                                                                           | 3                     | 0.573            | 0.708            | 0.630            | 0.637          |
| IPI00012535.1     | DnaJ homolog subfamily A member 1<br>K.NVVHQLSVTLEDLYNGATR.K<br>K.QISQAYEVLSDAK.K<br>R.TIVITSHPGQIVK.H                                                                                                                                                                                                                                  | 3                     | 0.813            | 0.608            | 0.502            | 0.641          |
| IPI00299573.11    | 60S ribosomal protein L7a<br>K.KVAPAPAVVK.K<br>K.VAPAPAVVK.K<br>R.LKVPPAINQFTQALDR.Q<br>R.QTATQLLK.L<br>R.AGVNTVTTLVENK.K<br>R.AGVNTVTTLVENKK.A<br>K.VPPAINQFTQALDR.Q<br>K.TCTTVAFTQVNSEDKGALAK.L<br>R.HWGGNVLGPK.S<br>K.VAPAPAVVKKQEAK.K<br>R.LKVPPAINQFTQALDRQTATQLLK.L<br>K.ELATKL.G<br>R.RHWGGNVLGPK.S<br>R.KTCTTVAFTQVNSEDKGALAK.L | 14                    | 0.758            | 0.711            | 0.470            | 0.646          |
| IPI00026260.1     | Nucleoside diphosphate kinase B<br>K.YMNSGPVAMVWEGLNVVK.T<br>K.SCAHDWVY.E<br>K.SAEKEISLWFKPEELVDYK.S                                                                                                                                                                                                                                    | 5                     |                  | 0.489            | 0.806            | 0.648          |

| <b>IPI number</b> | <b>Protein name</b>                                                                                                                                                                                                                                                                                                       | <b>Peptide number</b> | <b>Forward 1</b> | <b>Reverse 2</b> | <b>Reverse 3</b> | <b>Average</b> |
|-------------------|---------------------------------------------------------------------------------------------------------------------------------------------------------------------------------------------------------------------------------------------------------------------------------------------------------------------------|-----------------------|------------------|------------------|------------------|----------------|
|                   | R.NIIHGSDSVK.S<br>K.DRPFFPGLVK.Y                                                                                                                                                                                                                                                                                          |                       |                  |                  |                  |                |
| IPI00013415.1     | 40S ribosomal protein S7<br>R.KAIIIFVVPQLK.S<br>K.AIIIFVVPQLK.S<br>R.TLTAVHDAILEDLVFPSEIVGK.R<br>R.TLTAVHDAILEDLVFPSEIVGKR.I<br>K.DVNFEPPEFQ.L<br>R.SRTLTA VHDAILEDLVFPSEIVGKR.I<br>K.KLTGKDVNFEPPEFQ.L<br>K.LTGKDVNFEPPEFQ.L                                                                                             | 8                     | 0.714            | 0.435            | 0.801            | 0.650          |
| IPI00027493.1     | 4F2 cell-surface antigen heavy chain<br>R.IGDLQAFQGHGAGNLAGLK.G<br>R.LLTSFLPAQLLR.L<br>K.GQSEDPGSLLSLFR.R<br>K.ADLLLSTQPGREEGSPLER.L<br>R.LKLEPHEGLLLRFPYA.A                                                                                                                                                              | 5                     | 0.704            | 0.700            | 0.556            | 0.653          |
| IPI00016910.1     | Eukaryotic translation initiation factor 3 subunit 8<br>K.SIVDKEGVPR.F<br>R.AKELLGQGLLLR.S<br>K.VWDLFPEADKVR.T<br>K.ELLGQGLLLR.S<br>R.TEPTAQNLALQLAEKLGSLVENNER.V<br>K.RLDEEEEDNEGGEWERVR.G<br>K.LGSLVENNER.V<br>K.GTEITHAVVIKKLNEILQAR.G<br>K.LNEILQAR.G<br>K.DAHNALLDIQSSGR.A<br>R.TEPTAQNLALQLAEKLGSLVENNERVFDHK<br>.Q | 11                    | 0.680            | 0.708            | 0.577            | 0.655          |

| <b>IPI number</b> | <b>Protein name</b>               | <b>Peptide number</b> | <b>Forward 1</b> | <b>Reverse 2</b> | <b>Reverse 3</b> | <b>Average</b> |
|-------------------|-----------------------------------|-----------------------|------------------|------------------|------------------|----------------|
| IPI00186290.5     | Elongation factor 2               | 31                    | 0.649            | 0.688            | 0.630            | 0.656          |
|                   | R.YVEPIEDVPCGNIVGLVGVDQFLVK.T     |                       |                  |                  |                  |                |
|                   | R.IMGPNYTPGKK.E                   |                       |                  |                  |                  |                |
|                   | K.KEDLYLKPIQR.T                   |                       |                  |                  |                  |                |
|                   | K.EDLYLKPIQR.T                    |                       |                  |                  |                  |                |
|                   | K.TGTITTFEHAHNMR.V                |                       |                  |                  |                  |                |
|                   | R.TILMMGR.Y                       |                       |                  |                  |                  |                |
|                   | R.RWLPAGDALLQMITIHLPSVTAQK.Y      |                       |                  |                  |                  |                |
|                   | R.VMKFSVSPVVR.V                   |                       |                  |                  |                  |                |
|                   | R.WLPAGDALLQMITIHLPSVTAQK.Y       |                       |                  |                  |                  |                |
|                   | K.FSVSPVVR.V                      |                       |                  |                  |                  |                |
|                   | R.CELLYEGPPDDEAAMGIK.S            |                       |                  |                  |                  |                |
|                   | R.VAVEAKNPADLPK.L                 |                       |                  |                  |                  |                |
|                   | K.SCDPKGPLMMYISK.M                |                       |                  |                  |                  |                |
|                   | K.GPLMMYISK.M                     |                       |                  |                  |                  |                |
|                   | R.VFSGLVSTGLK.V                   |                       |                  |                  |                  |                |
|                   | R.YFDPANGKFSK.S                   |                       |                  |                  |                  |                |
|                   | R.TFCQLILDPIFK.V                  |                       |                  |                  |                  |                |
|                   | K.QFAEMYVAK.F                     |                       |                  |                  |                  |                |
|                   | R.IKPVLMMNKMDR.A                  |                       |                  |                  |                  |                |
|                   | K.FAAKGEGQLGPAER.A                |                       |                  |                  |                  |                |
|                   | R.ALLELQLEPEELYQTFQR.I            |                       |                  |                  |                  |                |
|                   | R.IKPVLMMNK.M                     |                       |                  |                  |                  |                |
|                   | K.GEGQLGPAER.A                    |                       |                  |                  |                  |                |
|                   | K.STAISLFYELSENDLNFIKQSK.D        |                       |                  |                  |                  |                |
|                   | K.STAISLFYELSENDLNFIK.Q           |                       |                  |                  |                  |                |
|                   | K.AGIIASAR.A                      |                       |                  |                  |                  |                |
|                   | K.STLTDSLVCAGIIASAR.A             |                       |                  |                  |                  |                |
|                   | K.STLTDSLVC.A                     |                       |                  |                  |                  |                |
|                   | R.NMSVIAHVDHGKSTLTDSLVC.A         |                       |                  |                  |                  |                |
|                   | R.NMSVIAHVDHGKSTLTDSLVCAGIIASAR.A |                       |                  |                  |                  |                |
|                   | -.VNFTVDQIR.A                     |                       |                  |                  |                  |                |

| <b>IPI number</b> | <b>Protein name</b>                                                                                                                                                                                                                                                             | <b>Peptide number</b> | <b>Forward 1</b> | <b>Reverse 2</b> | <b>Reverse 3</b> | <b>Average</b> |
|-------------------|---------------------------------------------------------------------------------------------------------------------------------------------------------------------------------------------------------------------------------------------------------------------------------|-----------------------|------------------|------------------|------------------|----------------|
| IPI00012479.1     | FKSG17<br>K.NILFVITKPDVYK.S                                                                                                                                                                                                                                                     | 1                     | 0.617            |                  | 0.705            | 0.661          |
| IPI00219155.4     | 60S ribosomal protein L27<br>K.VVLVLAGR.Y<br>R.YSVDIPLDK.T                                                                                                                                                                                                                      | 2                     | 0.565            | 0.738            | 0.682            | 0.662          |
| IPI00013495.1     | Splice Isoform 2 of ATP-binding cassette sub-family F<br>K.TLLIVSHDQGFLDDVCTDIIHLDAQR.L<br>R.FTFDPPPLSPPVLGLHGVTFGYQGQKPLFK.<br>N                                                                                                                                               | 2                     | 0.662            | 0.625            | 0.701            | 0.663          |
| IPI00030179.3     | 60S ribosomal protein L7<br>K.EVPAVPETLK.K<br>K.EVPAVPETLKK.K<br>R.KAGNFYVPAEPK.L<br>K.AGNFYVPAEPK.L<br>K.ASINMLR.I<br>K.SVNELIYKR.G                                                                                                                                            | 6                     | 0.709            | 0.789            | 0.491            | 0.663          |
| IPI00017617.1     | Probable ATP-dependent RNA helicase DDX5<br>K.QVSDLISVLR.E<br>R.RTAQEVETYRR.S<br>K.LLQLVEDR.G<br>R.GDGPICLVLAPTR.E<br>R.ELAQQVQQVAAEYCR.A<br>K.STCIYGGAPK.G<br>R.GVEICATPGR.L<br>R.LIDFLECGKTNLRR.T<br>R.DWVLNEFKHKGKAPILIATDVASR.G<br>R.EANQAINPK.L<br>K.QVSDLISVLREANQAINPK.L | 13                    | 0.585            | 0.639            | 0.769            | 0.664          |

| <b>IPI number</b> | <b>Protein name</b>                                                                                                                                                                                                                                   | <b>Peptide number</b> | <b>Forward 1</b> | <b>Reverse 2</b> | <b>Reverse 3</b> | <b>Average</b> |
|-------------------|-------------------------------------------------------------------------------------------------------------------------------------------------------------------------------------------------------------------------------------------------------|-----------------------|------------------|------------------|------------------|----------------|
|                   | K.APILIATDVASR.G<br>K.TGTAYTFFTPNNIKQVSDLISVLR.E                                                                                                                                                                                                      |                       |                  |                  |                  |                |
| IPI00023748.3     | Nascent polypeptide-associated complex alpha subunit<br>K.NILFVITKPDVYKSPASDTYIVFGGEAK.I<br>K.SPASDTYIVFGGEAK.I<br>K.IEDLSQQAQLAAAEKFK.V<br>R.ALKNNSNDIVNAIMELT.M<br>K.SPASDTYIVFGGEAKIEDLSQQAQLAAAEKFK.V<br>K.IEDLSQQAQLAAAEK.F<br>K.DIELVMSQANVSR.A | 7                     | 0.641            | 0.715            | 0.641            | 0.666          |
| IPI00220373.3     | Insulin-degrading enzyme<br>R.ESLDDLTLNLVVK.L                                                                                                                                                                                                         | 2                     |                  | 0.705            | 0.630            | 0.668          |
| IPI00219678.2     | Eukaryotic translation initiation factor 2 subunit 1<br>R.ADIEVACYGYEGIDAVKEALR.A<br>K.VVTDTDETELAR.Q                                                                                                                                                 | 2                     | 0.642            | 0.581            | 0.780            | 0.668          |
| IPI00397828.2     | 20 kDa protein<br>R.LGGPEAGLGEYLFER.L                                                                                                                                                                                                                 | 1                     | 0.651            | 0.658            | 0.694            | 0.668          |
| IPI00444704.2     | Splice Isoform 2 of G-rich sequence factor 1<br>R.GLPFQANAQDIINFFAPLKPVR.I                                                                                                                                                                            | 1                     |                  | 0.674            | 0.662            | 0.668          |
| IPI00037619.2     | Ribosomal protein L39 variant<br>K.QNRPIPQWIR.M                                                                                                                                                                                                       | 1                     | 0.694            | 0.699            | 0.611            | 0.668          |
| IPI00219229.2     | U6 snRNA-associated Sm-like protein LSm3<br>R.GDGVVLVAPPLR.V<br>R.GDGVVLVAPPLRV.G                                                                                                                                                                     | 2                     | 0.725            | 0.552            | 0.728            | 0.668          |

| <b>IPI number</b> | <b>Protein name</b>                                                                                                                                                                                                                                                                                                                                                             | <b>Peptide number</b> | <b>Forward 1</b> | <b>Reverse 2</b> | <b>Reverse 3</b> | <b>Average</b> |
|-------------------|---------------------------------------------------------------------------------------------------------------------------------------------------------------------------------------------------------------------------------------------------------------------------------------------------------------------------------------------------------------------------------|-----------------------|------------------|------------------|------------------|----------------|
| IPI00008475.1     | Hydroxymethylglutaryl-CoA synthase, cytoplasmic<br>R.IGVFSYGSGLAATLYSLK.V<br>R.IGVFSYGSGLAATLYSLKVTQDATPGSALDKI<br>TASLCDLK.S<br>K.VTQDATPGSALDKITASLCDLK.S<br>R.TGVAPDVFAENMK.L<br>R.RTPNDDTLDEGVGLVHSNIATEHIPSPAK.K<br>R.NNLSYDCIGRLEVGTETIIDKSK.S<br>R.LEVGTETIIDKSK.S<br>R.PTGGVGAVALLIGNAPLIFER.G<br>K.ITASLCDLK.S<br>K.LSIQCYLSALDR.C<br>R.MLLNDFLNDQNR.D<br>K.ASELFSQK.T | 12                    | 0.671            | 0.875            | 0.459            | 0.669          |
| IPI00010157.1     | S-adenosylmethionine synthetase isoform type-2<br>K.AVVPAKYLDEDTIYHLQPSGR.F<br>R.FVIGGPQGDAGLTGR.K<br>K.NFDLRPGVIVR.D<br>R.DLDLKKPIYQR.T                                                                                                                                                                                                                                        | 4                     | 0.676            | 0.674            | 0.658            | 0.669          |
| IPI00000728.3     | Splice Isoform 1 of Ubiquitin carboxyl-terminal<br>hydrolase 15<br>R.FSKADTIDTIEKEIR.K<br>R.KIFSIPDEKETR.L<br>R.TLEVYLVR.M<br>R.NNTEDKLYNLLLLR.M<br>K.AAYVLFYQR.Q                                                                                                                                                                                                               | 5                     | 0.787            | 0.622            | 0.598            | 0.669          |
| IPI00156689.3     | Synaptic vesicle membrane protein VAT-1 homolog<br>K.VVTYGMANLLTGPK.R<br>R.LLALYNQGHKPHIDSVWPF EK.V<br>K.VLLVPGPEKE.N<br>R.PAAPPAPGPGQLTLR.L                                                                                                                                                                                                                                    | 6                     | 1.538            | 1.573            | 1.390            | 1.500          |

| <b>IPI number</b> | <b>Protein name</b>                                                                                                                                                 | <b>Peptide number</b> | <b>Forward 1</b> | <b>Reverse 2</b> | <b>Reverse 3</b> | <b>Average</b> |
|-------------------|---------------------------------------------------------------------------------------------------------------------------------------------------------------------|-----------------------|------------------|------------------|------------------|----------------|
|                   | R.ACGLNFADLMAR.Q<br>K.LQSRPAAPPAPGPGQLTLR.L                                                                                                                         |                       |                  |                  |                  |                |
| IPI00295741.4     | Cathepsin B precursor<br>K.LPASFDAREQWPQCPTIK.E<br>K.LPASFDAR.E<br>R.EQWPQCPTIK.E<br>R.EQWPQCPTIKEIR.D<br>K.ILRGQDHCGIESEVVAGIPR.T<br>R.GQDHCGIESEVVAGIPR.T         | 6                     | 1.587            | 1.672            | 1.250            | 1.503          |
| IPI00217357.2     | Cell division cycle and apoptosis regulator protein 1<br>R.IQTLPNQNSQTQPLLK.T<br>K.AGLLQPPVR.I                                                                      | 2                     | 1.429            |                  | 1.586            | 1.507          |
| IPI00027776.6     | Ferrochelatase, mitochondrial precursor<br>R.IGGGSPIKIWTSK.Q<br>K.LLDELSPNTAPHKYYIGFR.Y<br>R.YVHPLTEEAIEEMERDGLER.A<br>R.GDPYPQEVSATVQK.V<br>K.ALADLVHSHIQSNELCSK.Q | 5                     | 1.754            | 1.532            | 1.324            | 1.537          |
| IPI00024145.1     | Splice Isoform 1 of Voltage-dependent anion-selective channel 2<br>R.NNFAVGYR.T<br>K.YQLDPTASISAK.V<br>K.VNNSSLIGVGYTQTLRPGVK.L<br>K.LTLSALVDGK.S                   | 4                     | 1.587            |                  | 1.545            | 1.566          |
| IPI00220835.6     | Protein transport protein Sec61 beta subunit<br>-.PGPTPSGTNVGSSGR.S                                                                                                 | 1                     |                  | 1.587            | 1.552            | 1.570          |
| IPI00218568.6     | Pterin-4-alpha-carbinolamine dehydratase                                                                                                                            | 1                     | 1.470            | 1.587            | 1.685            | 1.581          |

| <b>IPI number</b> | <b>Protein name</b>                                                                                                                                                                                                                              | <b>Peptide number</b> | <b>Forward 1</b> | <b>Reverse 2</b> | <b>Reverse 3</b> | <b>Average</b> |
|-------------------|--------------------------------------------------------------------------------------------------------------------------------------------------------------------------------------------------------------------------------------------------|-----------------------|------------------|------------------|------------------|----------------|
|                   | R.LSAEERDQLLPNLR.A                                                                                                                                                                                                                               |                       |                  |                  |                  |                |
| IPI00021924.1     | Histone H1x<br>K.YSQLVVETIRR.L<br>K.ALVQNDTLLQVK.G<br>R.GAPAAATAPAPTAHK.A<br>R.RGAPAAATAPAPTAHK.A                                                                                                                                                | 4                     | 1.786            | 1.385            | 1.592            | 1.588          |
| IPI00642144.2     | Aldehyde dehydrogenase 1 family, member A1<br>R.QAFQIGSPWR.T<br>R.YCAGWADKIQGR.T                                                                                                                                                                 | 2                     | 1.587            | 1.832            | 1.357            | 1.592          |
| IPI00744503.1     | 17 kDa protein<br>K.VLTSLGDATK.H                                                                                                                                                                                                                 | 1                     | 1.721            |                  | 1.474            | 1.598          |
| IPI00093057.6     | Coproporphyrinogen III oxidase, mitochondrial precursor<br>R.ATSLGRPEEEDELAHR.C<br>R.AVVPSYIPLVK.K<br>R.GIGGIFDLDLSPSKEEVFR.F<br>R.IESILMSLPLTAR.W<br>K.EAEILEVLR.H                                                                              | 5                     | 1.639            | 1.907            | 1.282            | 1.609          |
| IPI00028160.1     | Splice Isoform 1 of Porphobilinogen deaminase<br>R.IQTDSVVATLK.A<br>R.ENPHDAVVFHPK.F<br>K.TLETLPEKSVVGTSSLR.R<br>R.GPQLAAQNGLISLANLLLSK.G<br>R.KFPHLEFR.S<br>R.KLDEQQEFSAILATAGLQR.M<br>R.AKDQDILDVGVLDHPETLLR.C<br>R.NIPRGPQLAAQNGLISLANLLLSK.G | 8                     | 1.887            | 1.850            | 1.752            | 1.830          |



| <b>IPI number</b> | <b>Protein name</b>                                                                                                                                                                                                                     | <b>Peptide number</b> | <b>Forward 1</b> | <b>Reverse 2</b> | <b>Reverse 3</b> | <b>Average</b> |
|-------------------|-----------------------------------------------------------------------------------------------------------------------------------------------------------------------------------------------------------------------------------------|-----------------------|------------------|------------------|------------------|----------------|
| IPI00337541.3     | NAD(P) transhydrogenase, mitochondrial precursor<br>R.VALSPAGVQNLVK.Q                                                                                                                                                                   | 1                     | 1.887            |                  | 1.923            | 1.905          |
| IPI00219038.8     | Histone H3.3<br>R.FQSAAGALQEASEAYLVGLFEDTNLCAIHA<br>K.R                                                                                                                                                                                 | 1                     | 2.083            | 2.343            | 1.907            | 2.111          |
| IPI00220706.9     | Hemoglobin gamma-1 subunit<br>-.GHFTEEDKATITSLWGK.V<br>-.GHFTEEDKATITSLWGKVNVEDAGGETLGR.L<br>K.MVTAVASALSSR.Y<br>K.MVTAVASALSSRY.H                                                                                                      | 4                     | 2.000            | 3.125            | 1.506            | 2.210          |
| IPI00217465.4     | Histone H1.2<br>K.SLVSKGTLVQTK.G<br>R.KASGPPVSELITK.A<br>K.ASGPPVSELITK.A<br>K.ASGPPVSELITKAVAASKER.S<br>R.SGVSLAALK.K<br>R.SGVSLAALKK.A<br>R.SGVSLAALKKALAAAGYDVEK.N<br>K.KALAAAGYDVEKNNSR.I<br>K.ALAAAGYDVEK.N<br>K.ALAAAGYDVEKNNSR.I | 10                    | 2.632            | 1.728            | 2.404            | 2.255          |
| IPI00030809.1     | Gamma-G globin (Fragment)<br>K.VNVEDAGGETLGR.L<br>R.LLVVYPWTQR.F<br>R.LLVVYPWTQRFFDSFGNLSSASAIMGNPK.V<br>R.FFDSFGNLSSASAIMGNPK.V<br>K.VLTSLGDAIK.H<br>K.EFTPEVQASWQK.M                                                                  | 6                     | 2.128            | 2.971            | 1.934            | 2.344          |

| <b>IPI number</b> | <b>Protein name</b>                                                                                                                                                                           | <b>Peptide number</b> | <b>Forward 1</b> | <b>Reverse 2</b> | <b>Reverse 3</b> | <b>Average</b> |
|-------------------|-----------------------------------------------------------------------------------------------------------------------------------------------------------------------------------------------|-----------------------|------------------|------------------|------------------|----------------|
| IPI00003935.5     | Histone H2B<br>K.AMGIMNSFVNDIFER.I<br>R.STITSREIQTAVR.L<br>R.EIQTAVRLLLLPGELAK.H<br>R.EIQTAVRLLLLPGELAKHAVSEGTK.A<br>R.LLLPGELAKHAVSEGTK.A<br>K.QVHPDTGISSK.A<br>R.EIQTAVR.L                  | 7                     | 3.030            | 2.370            | 1.641            | 2.347          |
| IPI00410714.4     | Hemoglobin alpha subunit<br>-.VLSPADKTNVK.A<br>K.AAWGKVGAAHAGEYGAEALER.M<br>K.VGAHAGEYGAEALER.M<br>R.MFLSFPTTK.T<br>K.TYFPHFDLSHGSAQVK.G<br>K.VADALTNAVAHVDDMPNALSALSSDLHAHK.<br>L            | 6                     | 2.222            | 3.171            | 1.677            | 2.357          |
| IPI00449049.4     | Poly [ADP-ribose] polymerase 1<br>R.TTNFAGILSQGLR.I<br>K.TLGDFAAEYAK.S<br>K.GFSLLATEDKEALKK.Q<br>K.SLQELFLAHILSPWGAEVKAEPVEVVAPR.G<br>K.KFYPLEIDYGQDEEAVK.K<br>K.LTVNPGTK.S<br>K.MIFDVESMKK.A | 7                     | 2.632            | 2.703            | 1.941            | 2.425          |
| IPI00171611.5     | histone H3.1<br>R.YRPGTVALR.E<br>K.STELLIR.K<br>R.LVREIAQDFKTDLR.F<br>R.EIAQDFKTDLR.F                                                                                                         | 4                     | 3.030            | 2.575            | 2.218            | 2.608          |

| <b>IPI number</b> | <b>Protein name</b>                                                                                                                                                                                                                                                                                    | <b>Peptide number</b> | <b>Forward 1</b> | <b>Reverse 2</b> | <b>Reverse 3</b> | <b>Average</b> |
|-------------------|--------------------------------------------------------------------------------------------------------------------------------------------------------------------------------------------------------------------------------------------------------------------------------------------------------|-----------------------|------------------|------------------|------------------|----------------|
| IPI00217471.2     | Hemoglobin epsilon subunit<br>K.AAVTSLWSK.M<br>K.AAVTSLWSKMNVEEAGGEALGR.L<br>K.MNVEEAGGEALGR.L<br>R.LLVVYPWTQRFFDSFGNLSSPSAILGNPK.V<br>R.FFDSFGNLSSPSAILGNPK.V                                                                                                                                         | 5                     | 2.174            | 3.613            | 2.447            | 2.745          |
| IPI00026272.1     | Histone H2A<br>R.VTIAQGGVLPNIQAVLLPK.K<br>R.HLQLAIRNDEELNK.L<br>R.NDEELNKLLGKVTIAQGGVLPNIQAVLLPK.K<br>R.AGLQFPVGR.V                                                                                                                                                                                    | 4                     | 3.333            | 1.975            | 2.938            | 2.749          |
| IPI00554676.1     | Hemoglobin gamma-2 subunit<br>K.MVTGVASALSSR. Y                                                                                                                                                                                                                                                        | 1                     | 2.778            | 3.448            | 2.286            | 2.837          |
| IPI00217473.4     | Hemoglobin zeta subunit<br>R.TIIVSMWAK.I<br>K.ISTQADTIGTETLER.L<br>K.ISTQADTIGTETLERLFLSHPQTK.T<br>R.LFLSHPQTK.T<br>K.TYFPHFDLHPGSAQLR.A<br>R.AHGSKVVAAVGDAVK.S<br>K.VVAAVGDAVK.S<br>K.SIDDIGGALSK.L<br>K.SIDDIGGALSKLSELHAYILR.V<br>K.SIDDIGGALSKLSELHAYILRVDPVNFK.L<br>K.LSELHAYILR.V<br>R.VDPVNFK.L | 12                    | 2.778            | 4.311            | 1.987            | 3.025          |
| IPI00453473.5     | Histone H4<br>R.DNIQGITKPAIR.R<br>R.DNIQGITKPAIRR.L                                                                                                                                                                                                                                                    | 8                     | 4.000            | 2.690            | 2.496            | 3.062          |

| <b>IPI number</b> | <b>Protein name</b>         | <b>Peptide number</b> | <b>Forward 1</b> | <b>Reverse 2</b> | <b>Reverse 3</b> | <b>Average</b> |
|-------------------|-----------------------------|-----------------------|------------------|------------------|------------------|----------------|
|                   | R.GVLKVFLENVIRDAVITYTEHAK.R |                       |                  |                  |                  |                |
|                   | R.ISGLIYEETR.G              |                       |                  |                  |                  |                |
|                   | R.KTVTAMDVVYALKR.Q          |                       |                  |                  |                  |                |
|                   | K.VFLENVIR.D                |                       |                  |                  |                  |                |
|                   | K.VFLENVIRDAVITYTEHAK.R     |                       |                  |                  |                  |                |
|                   | K.TVTAMDVVYALKR.Q           |                       |                  |                  |                  |                |
